# Supplementary material for: Copper-catalyzed three-component reaction to synthesize polysubstituted imidazo[1,2-a]pyridines
Source: Royal Society of Chemistry journal article supplement (doi:10.1039/d2ra02722d), 2022-01-01

**Supporting Online Material for**

**Copper-catalyzed three-component reaction to synthesize  
polysubstituted imidazo[1,2-*a*]pyridines**

Zitong Zhou,<sup>a</sup> Danyang Luo,<sup>a</sup> Guanrong Li,<sup>a</sup> Zhongtao Yang,<sup>a</sup> Liao Cui\*<sup>a</sup> and  
Weiguang Yang\*<sup>a,b,c</sup>

<sup>a</sup> *Public Service Platform of South China Sea for R&D Marine Biomedicine Resources, The Marine Biomedical Research Institute, Guangdong Medical University, Zhanjiang, 524023, China.*

<sup>b</sup> *The Marine Biomedical Research Institute of Guangdong Zhanjiang, Zhanjiang, Guangdong, 524023, China.*

<sup>c</sup> *Southern Marine Science and Engineering Guangdong Laboratory (Zhanjiang), Zhanjiang, Guangdong, 524023, China.*

Email: [luohui@gdmu.edu.cn](mailto:luohui@gdmu.edu.cn); [cuiliao@163.com](mailto:cuiliao@163.com), [09ywg@163.com](mailto:09ywg@163.com)

**Table of Contents**

|                                              |    |
|----------------------------------------------|----|
| 1. The structures of starting materials..... | S2 |
| 2. General information.....                  | S3 |
| 3. NMR Spectra.....                          | S4 |

1. The structures of starting materials.

The structures of starting materials **1a-1g**.

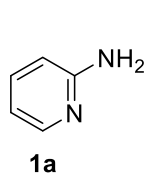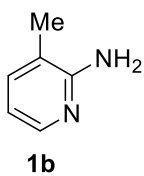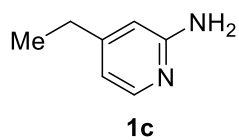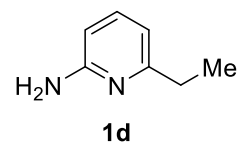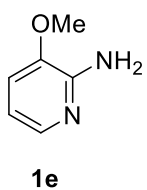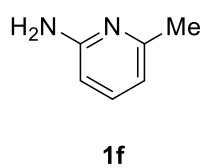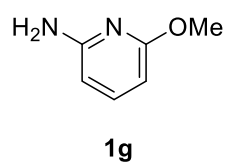

The structures of starting materials **2a-2g**.

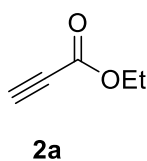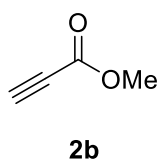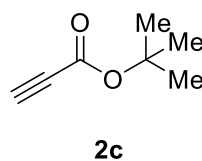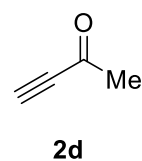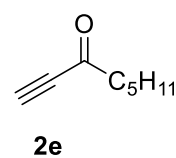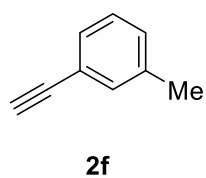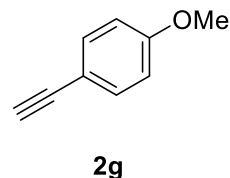

The structures of starting materials **3a-3i**.

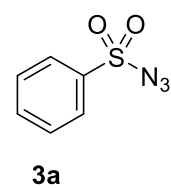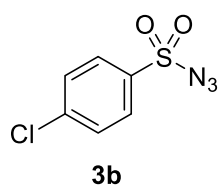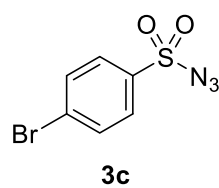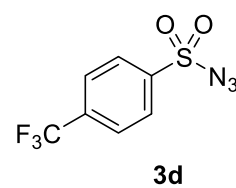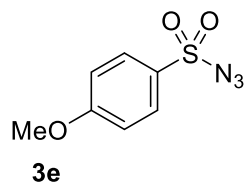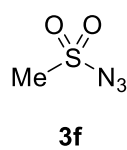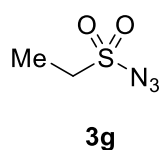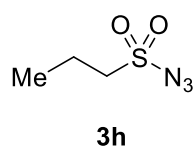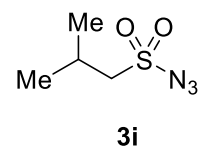

## 2. General Information

$^1\text{H}$  and  $^{13}\text{C}\{^1\text{H}\}$  NMR spectra were recorded at ambient temperatures on a 400 MHz Bruker spectrometer using  $\text{CDCl}_3$  or  $\text{DMSO}-d_6$  as solvent and tetramethylsilane (TMS) as the internal standard. Chemical shifts are presented as  $\delta$  values relative to TMS and  $^1\text{H}$ - $^1\text{H}$  coupling constants ( $J$  values) are given in Hz. IR spectra were recorded as KBr pellets on a Nicolet FT-IR 5DX spectrometer while HRMS measurements were carried out on a Bruker micrOTOF-Q II spectrometer. Melting points were determined on a Yanaco melting point apparatus and are uncorrected.

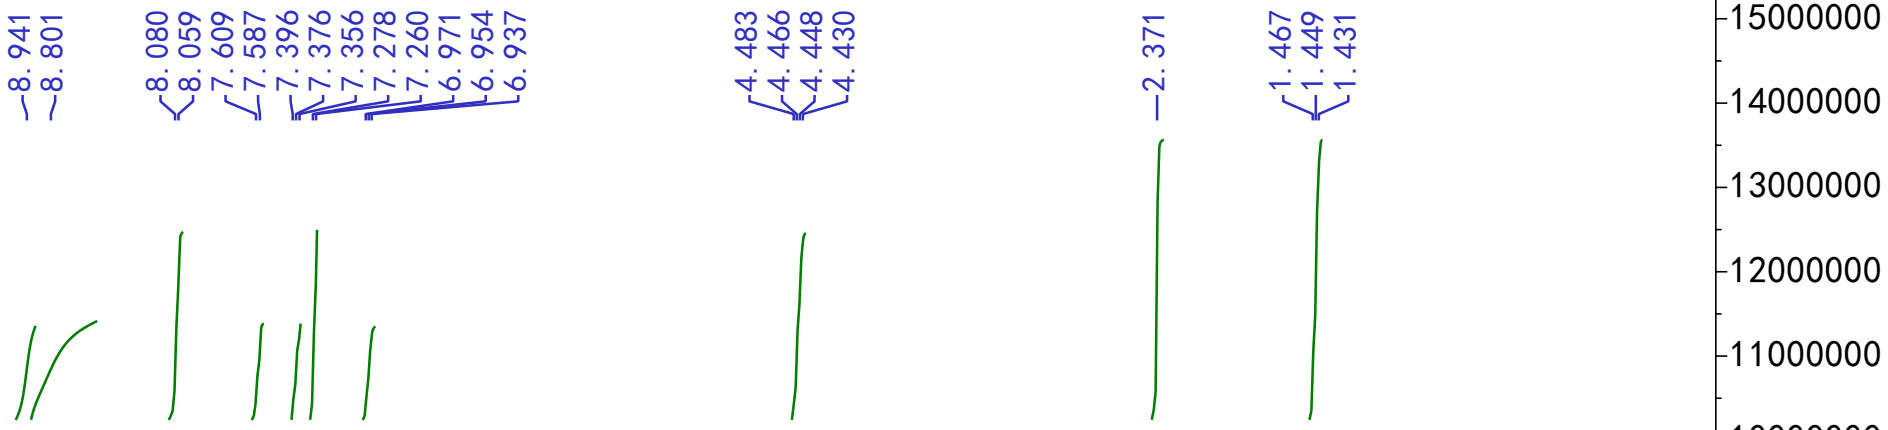

**Figure S1. 400 MHz  $^1\text{H}$  NMR spectrum of compound 4a (recorded in  $\text{CDCl}_3$ ).**

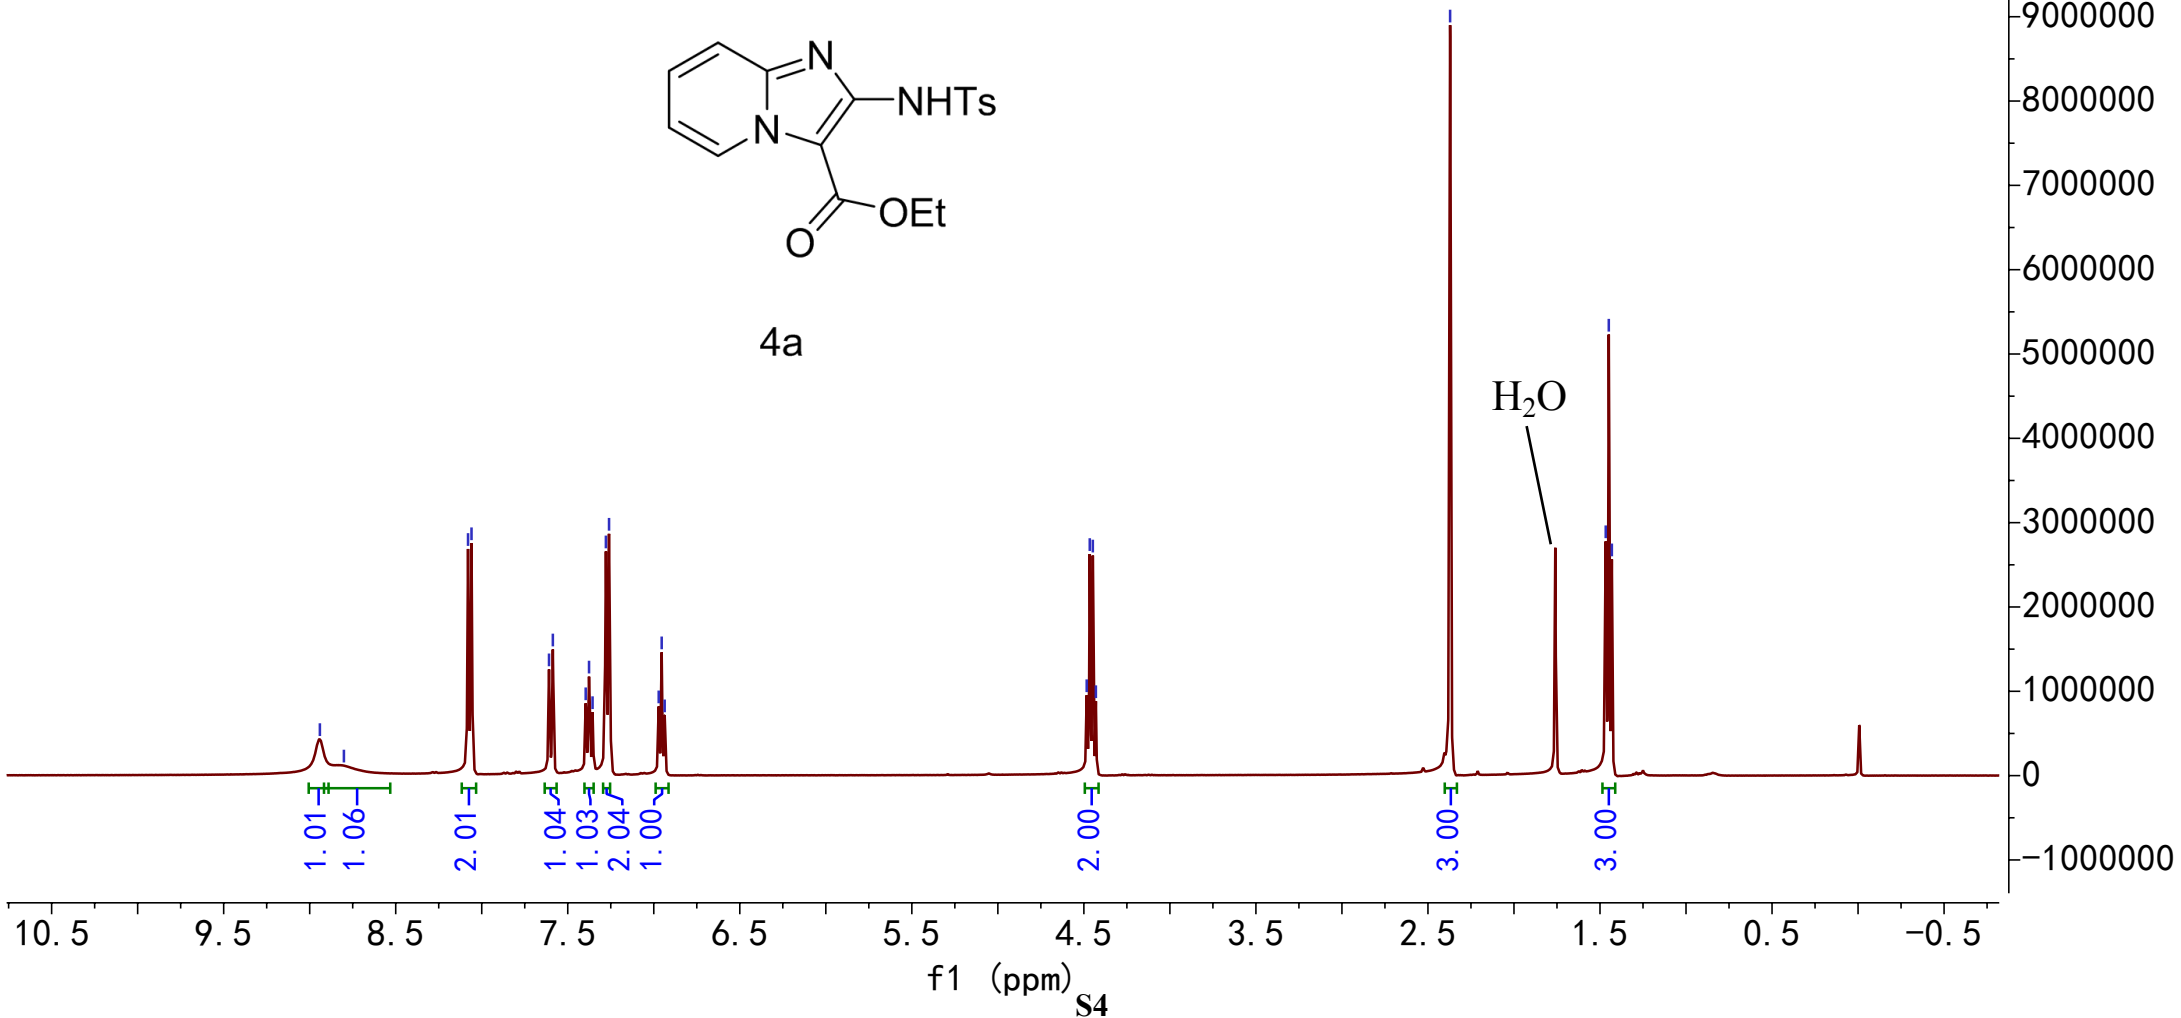

**Figure S2. 100 MHz  $^{13}\text{C}\{^1\text{H}\}$  NMR spectrum of compound 4a (recorded in  $\text{CDCl}_3$ ).**

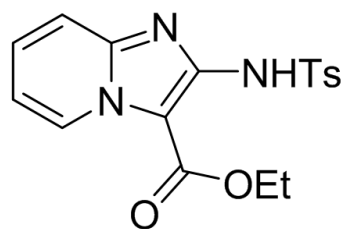

4a

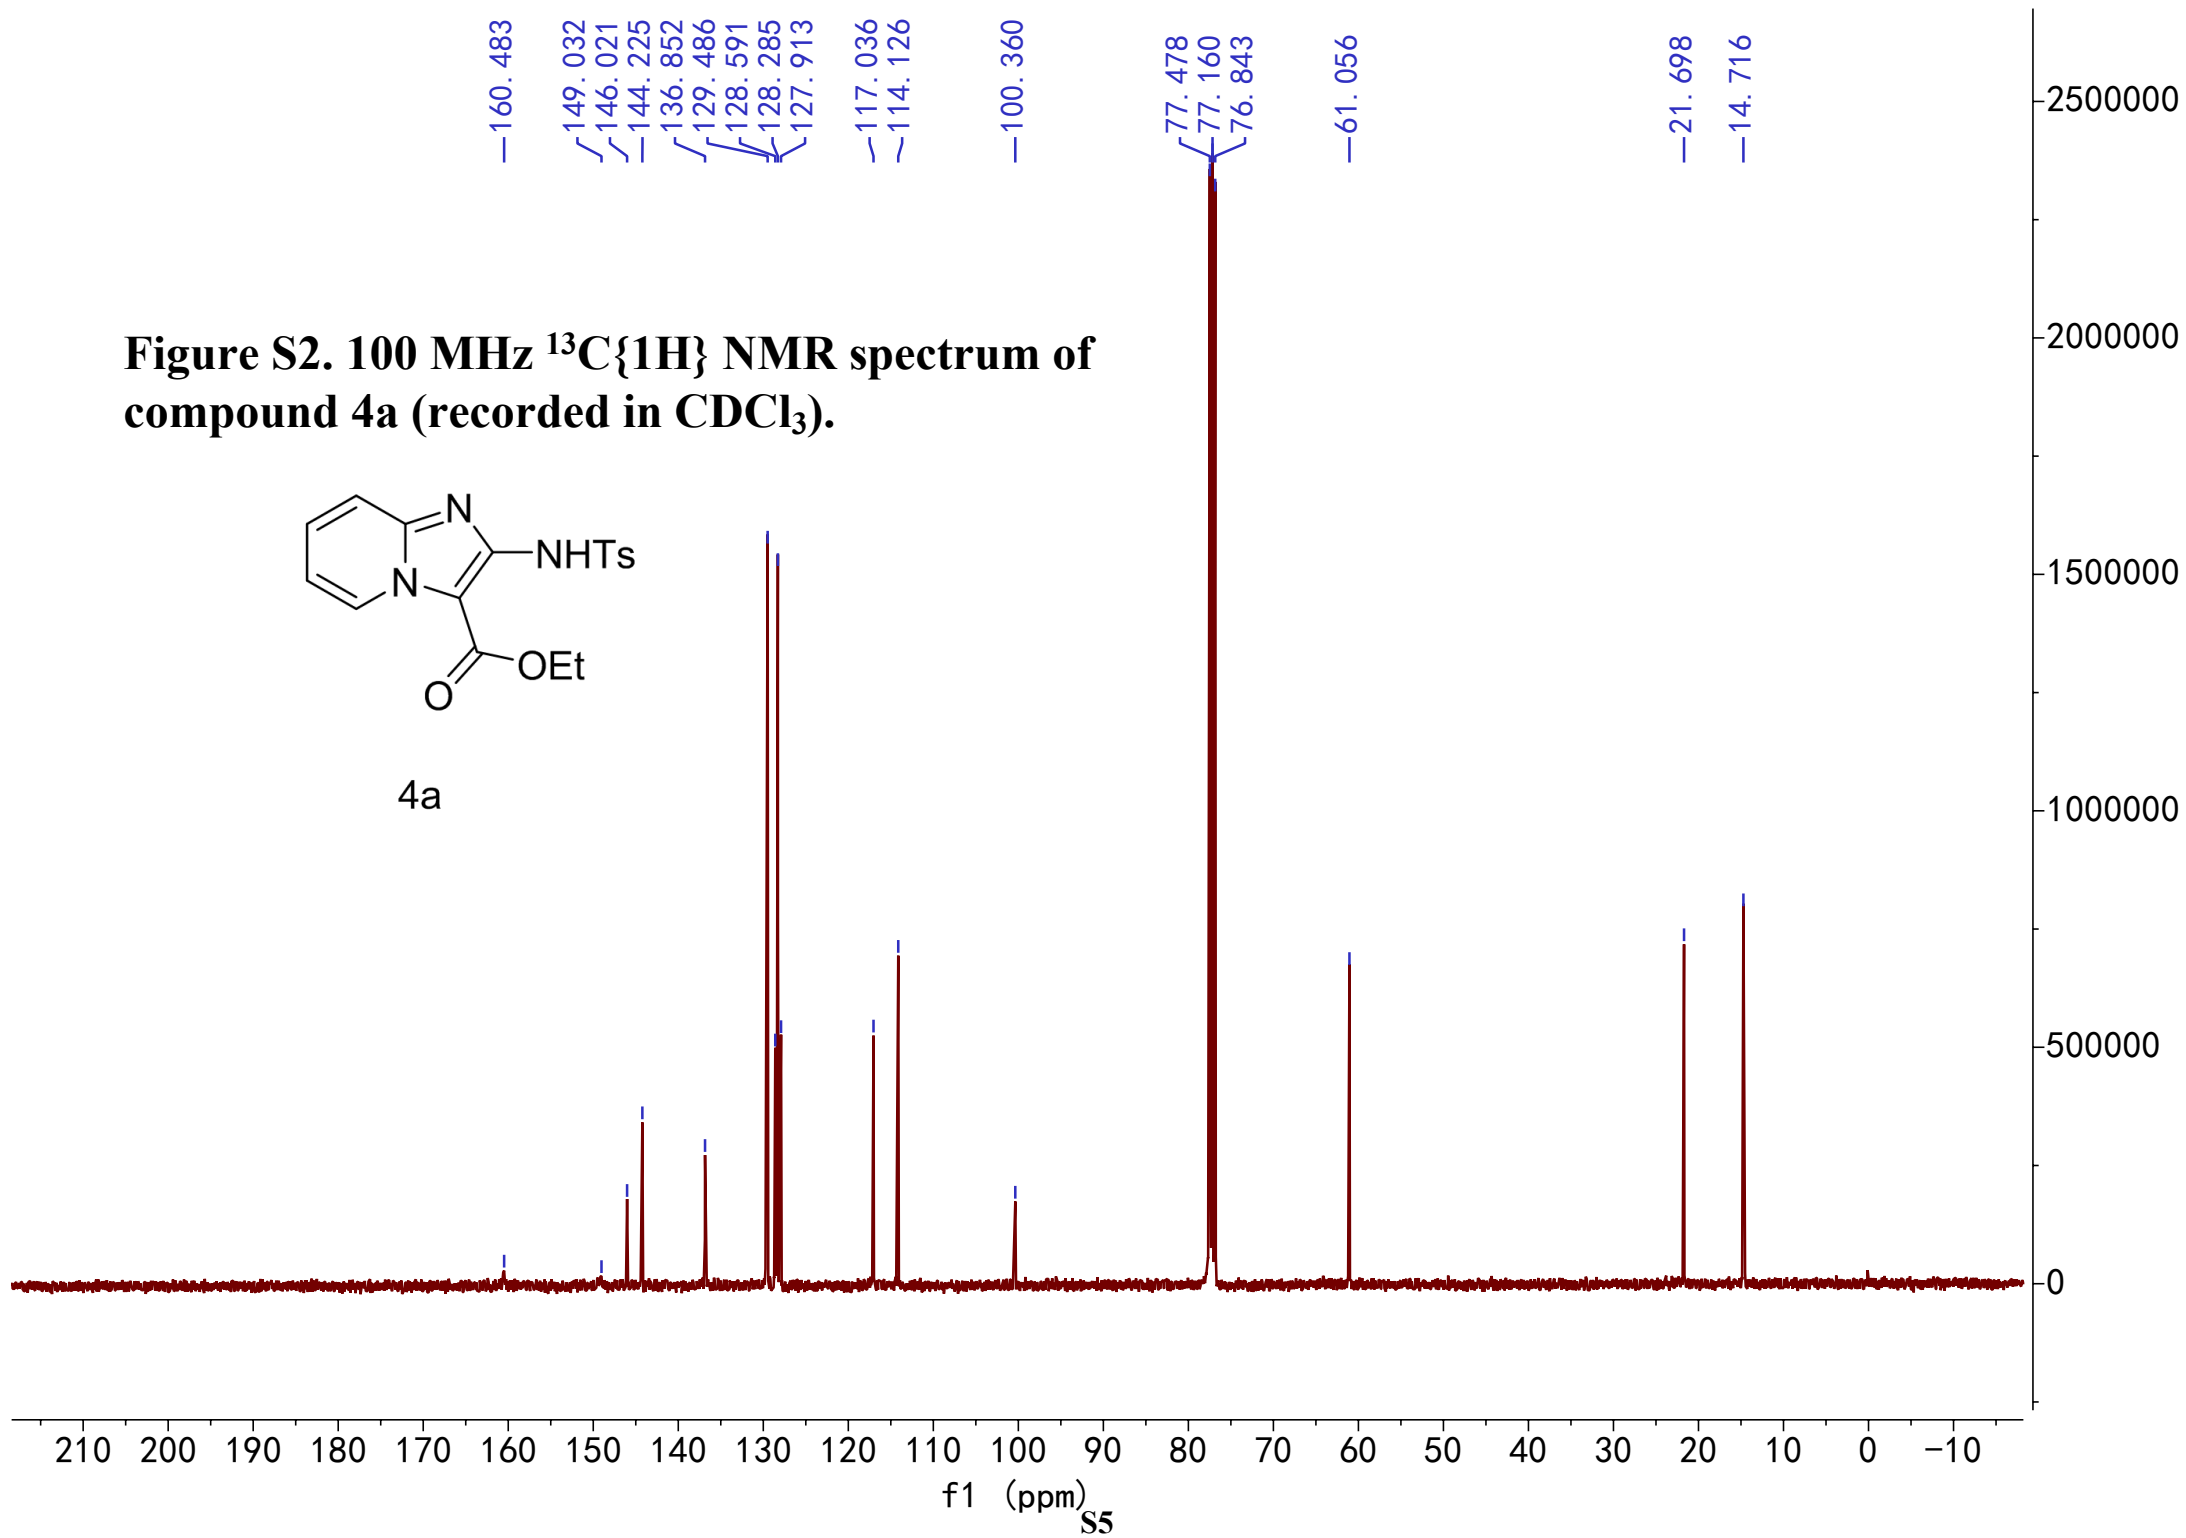

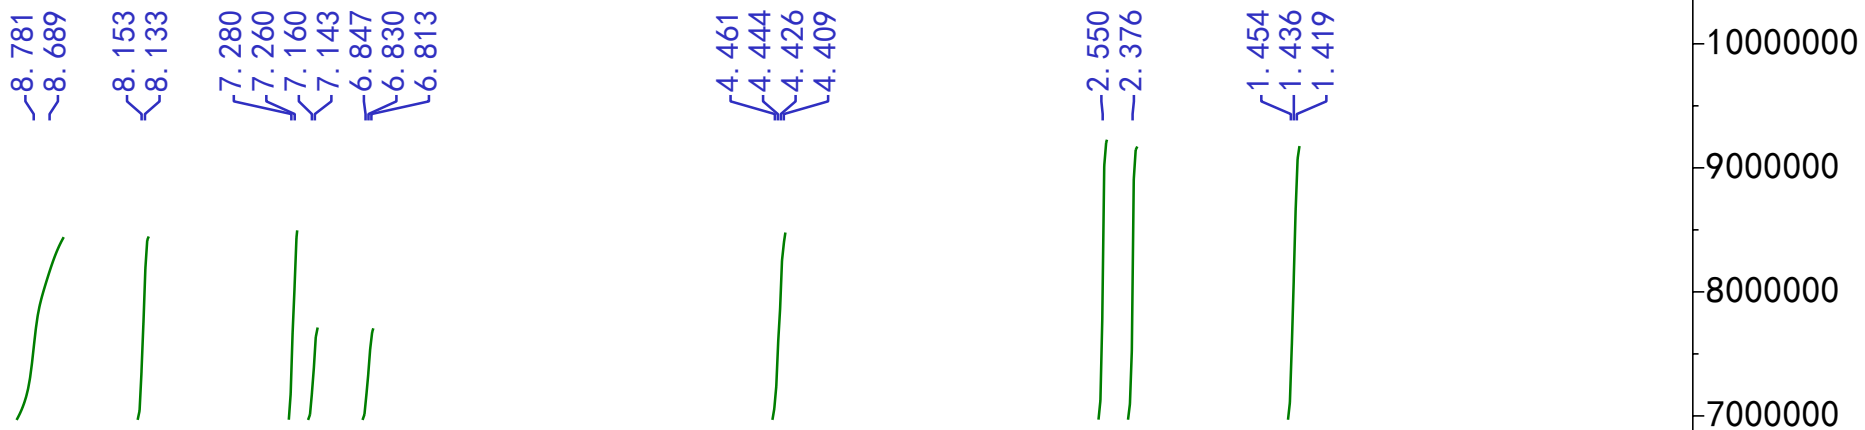

**Figure S3. 400 MHz <sup>1</sup>H NMR spectrum of compound 4b (recorded in CDCl<sub>3</sub>).**

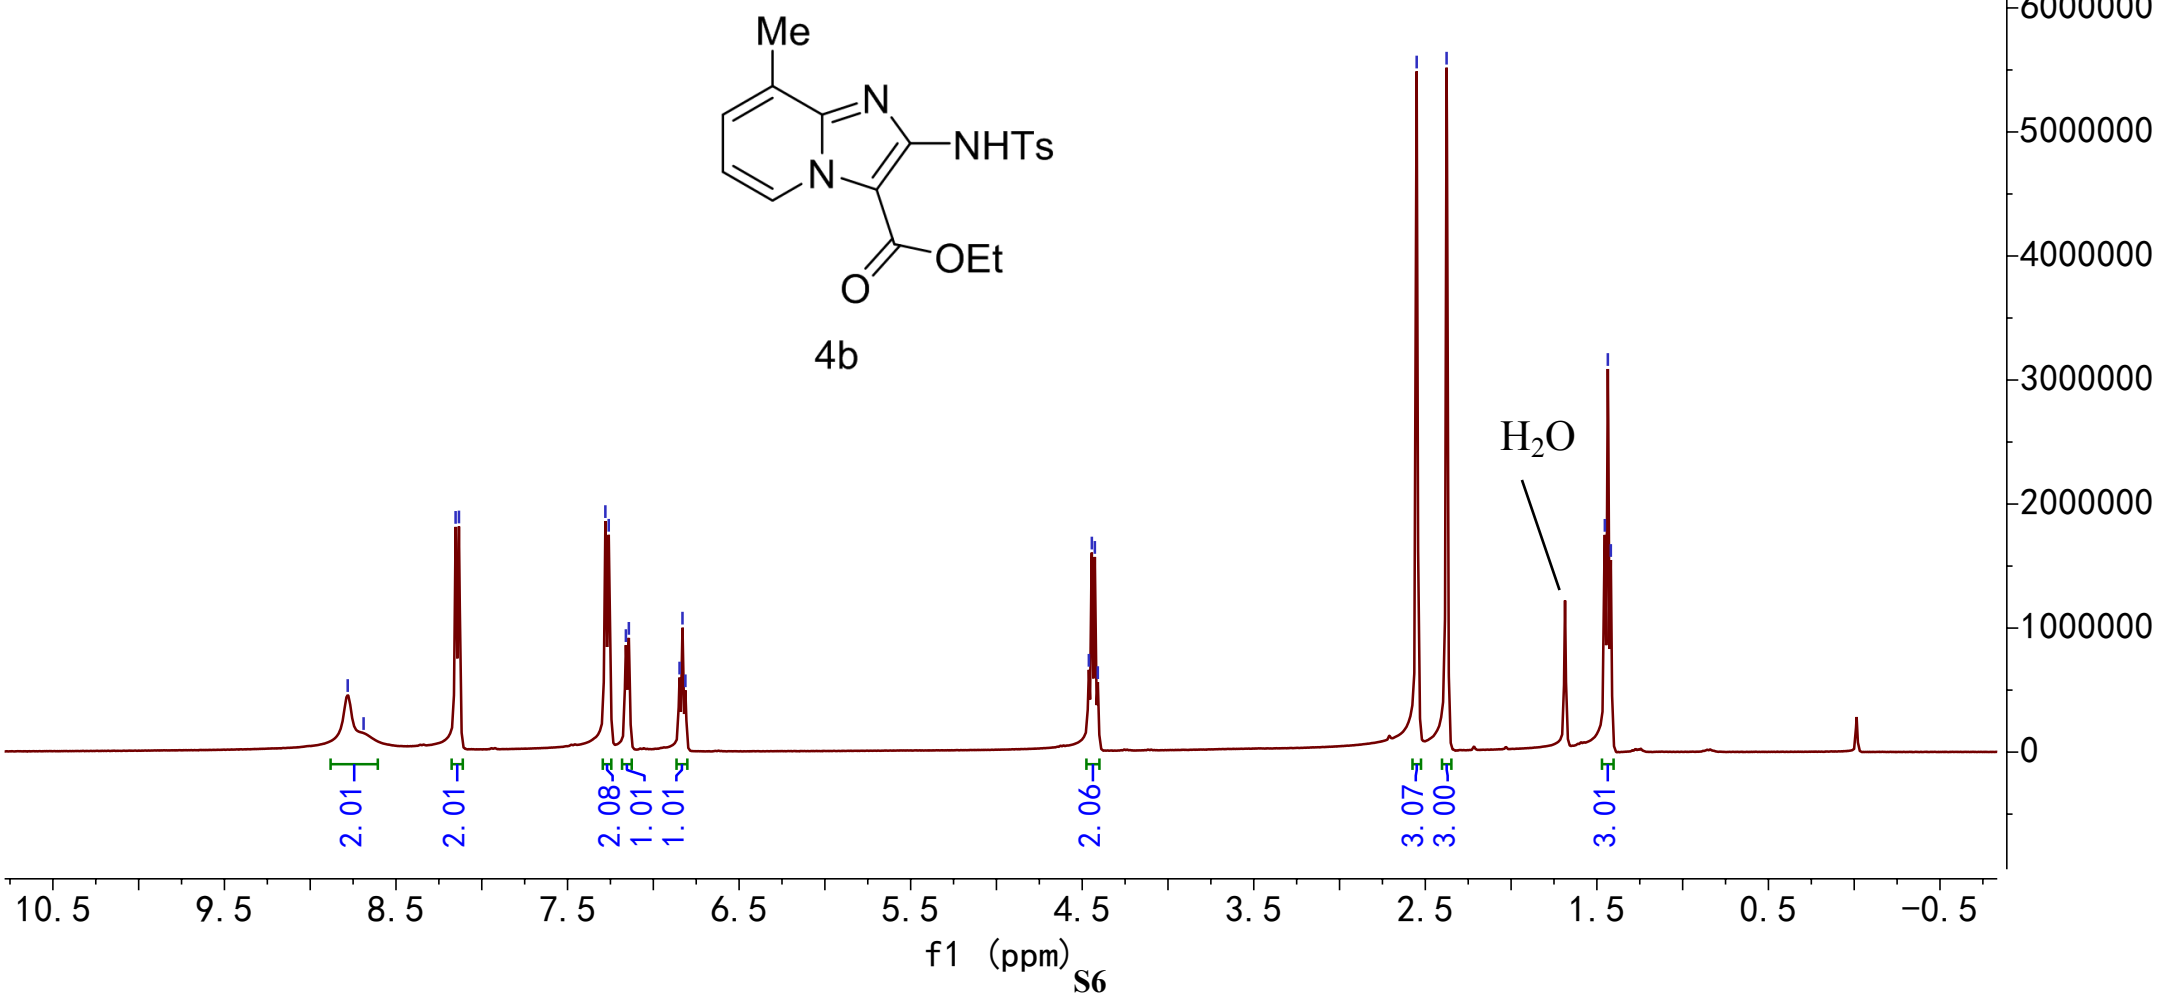

**Figure S4. 100 MHz  $^{13}\text{C}\{^1\text{H}\}$  NMR spectrum of compound 4b (recorded in  $\text{CDCl}_3$ ).**

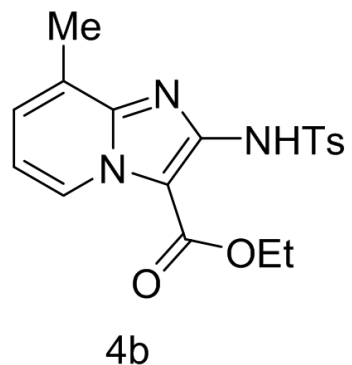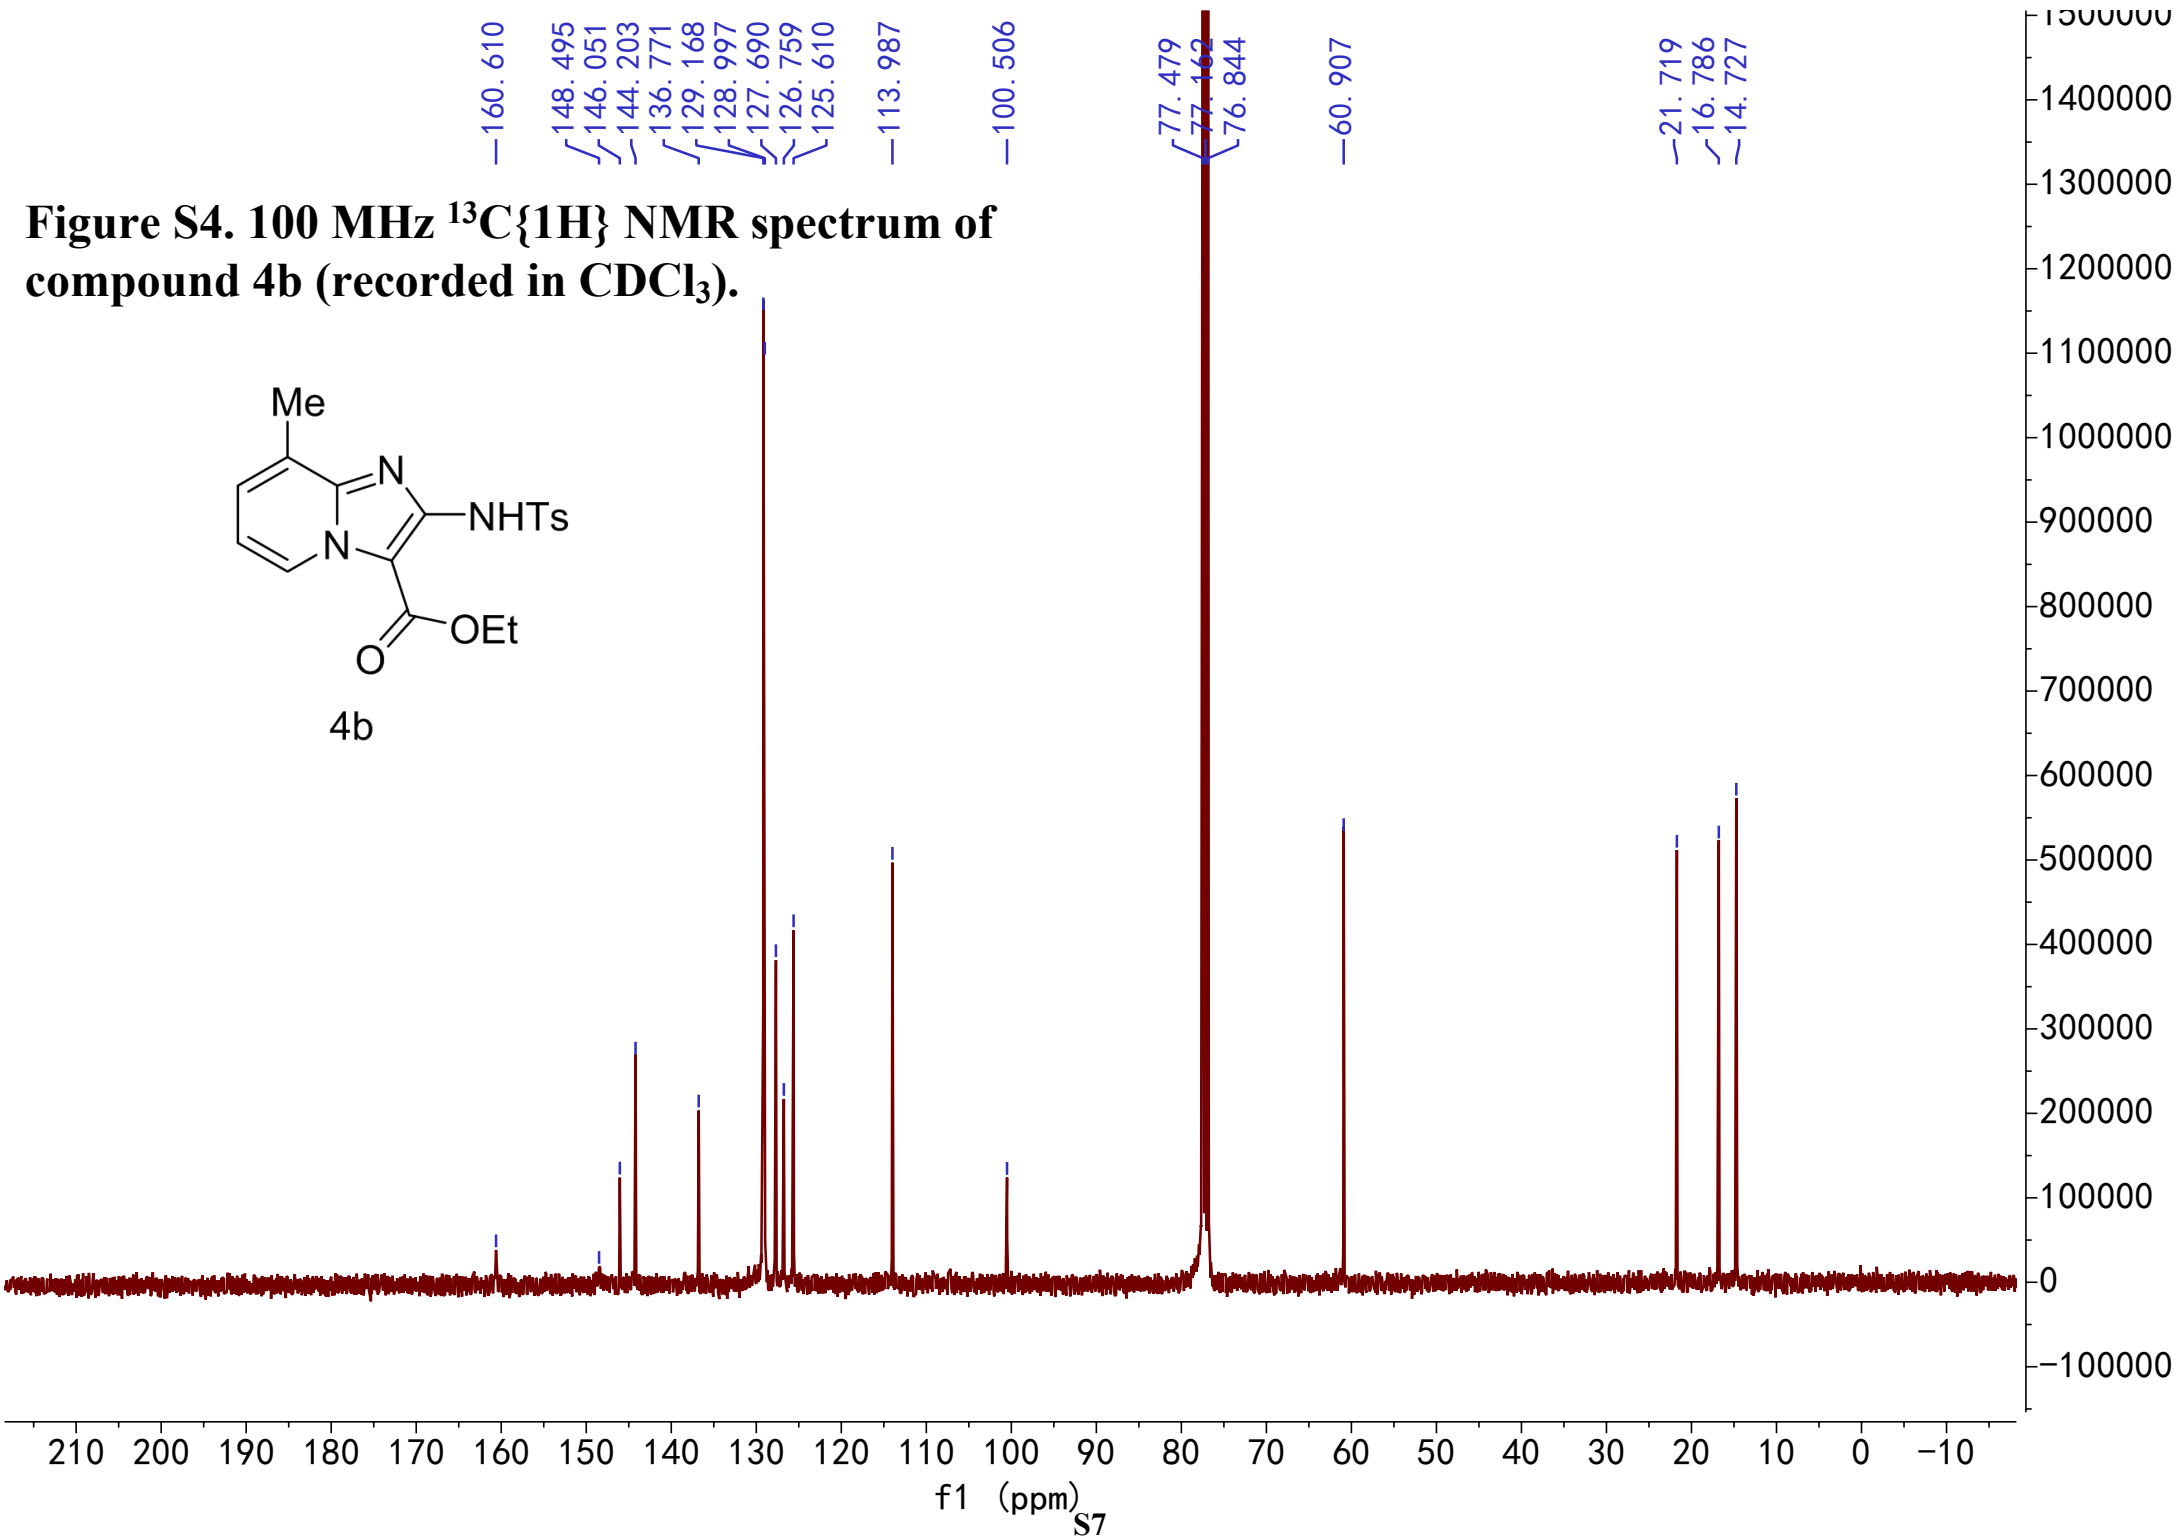

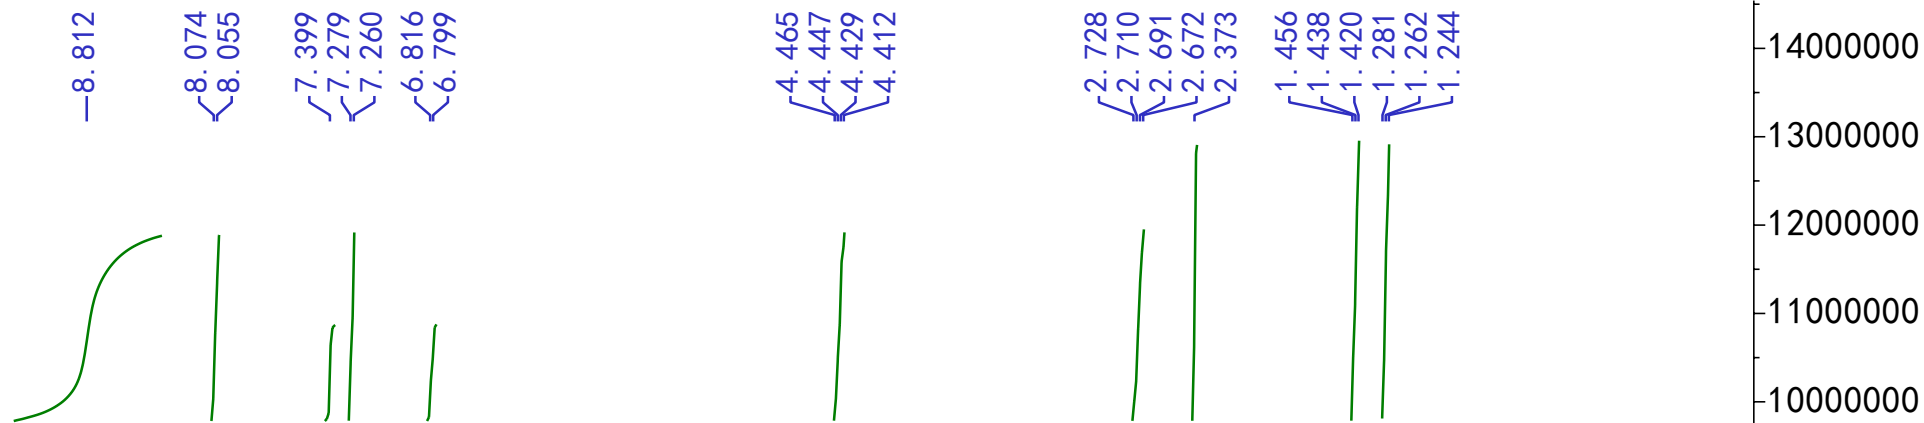

**Figure S5. 400 MHz  $^1\text{H}$  NMR spectrum of compound 4c (recorded in  $\text{CDCl}_3$ ).**

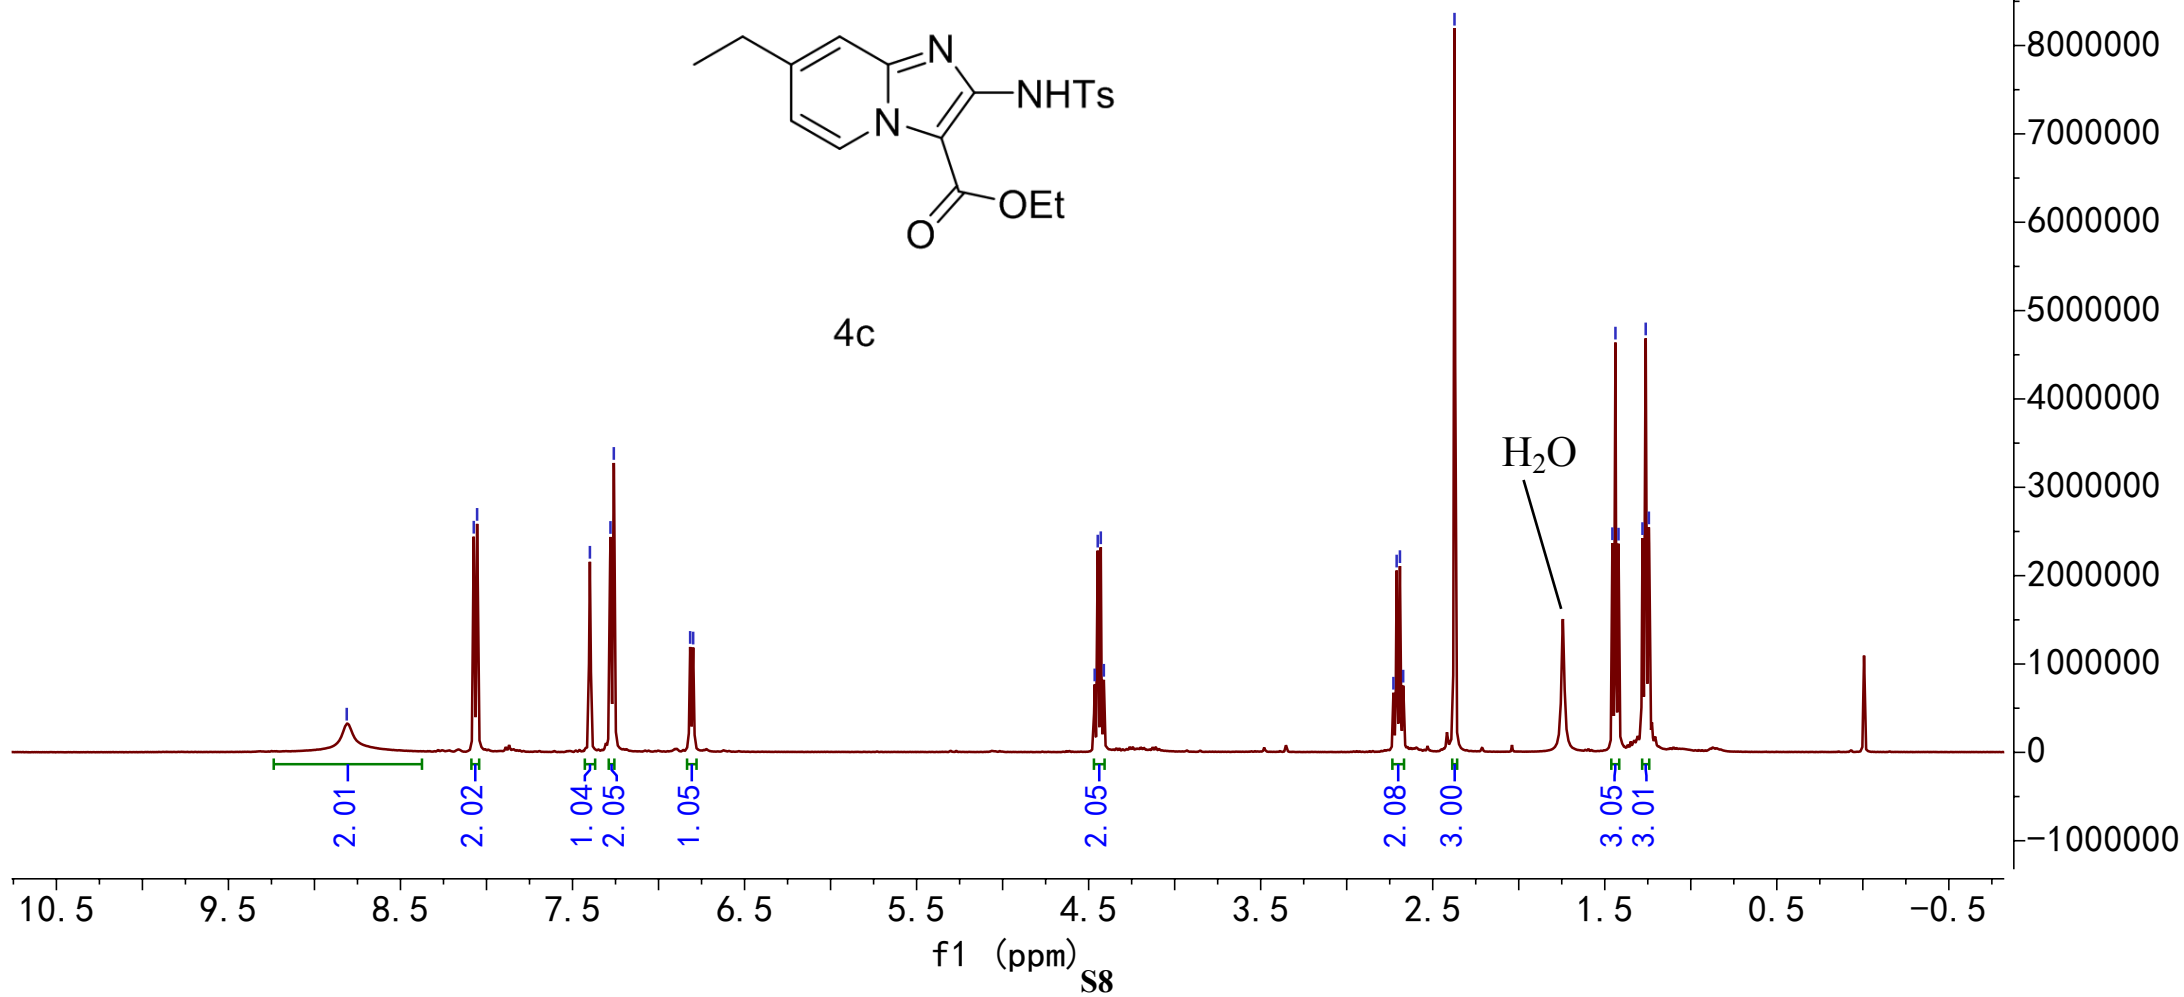



**Figure S6. 100 MHz  $^{13}\text{C}\{^1\text{H}\}$  NMR spectrum of compound 4c (recorded in  $\text{CDCl}_3$ ).**

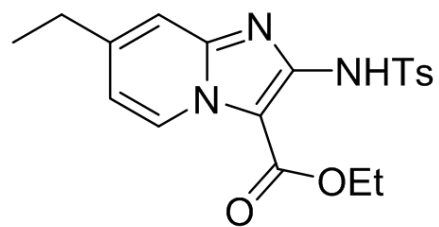

4c

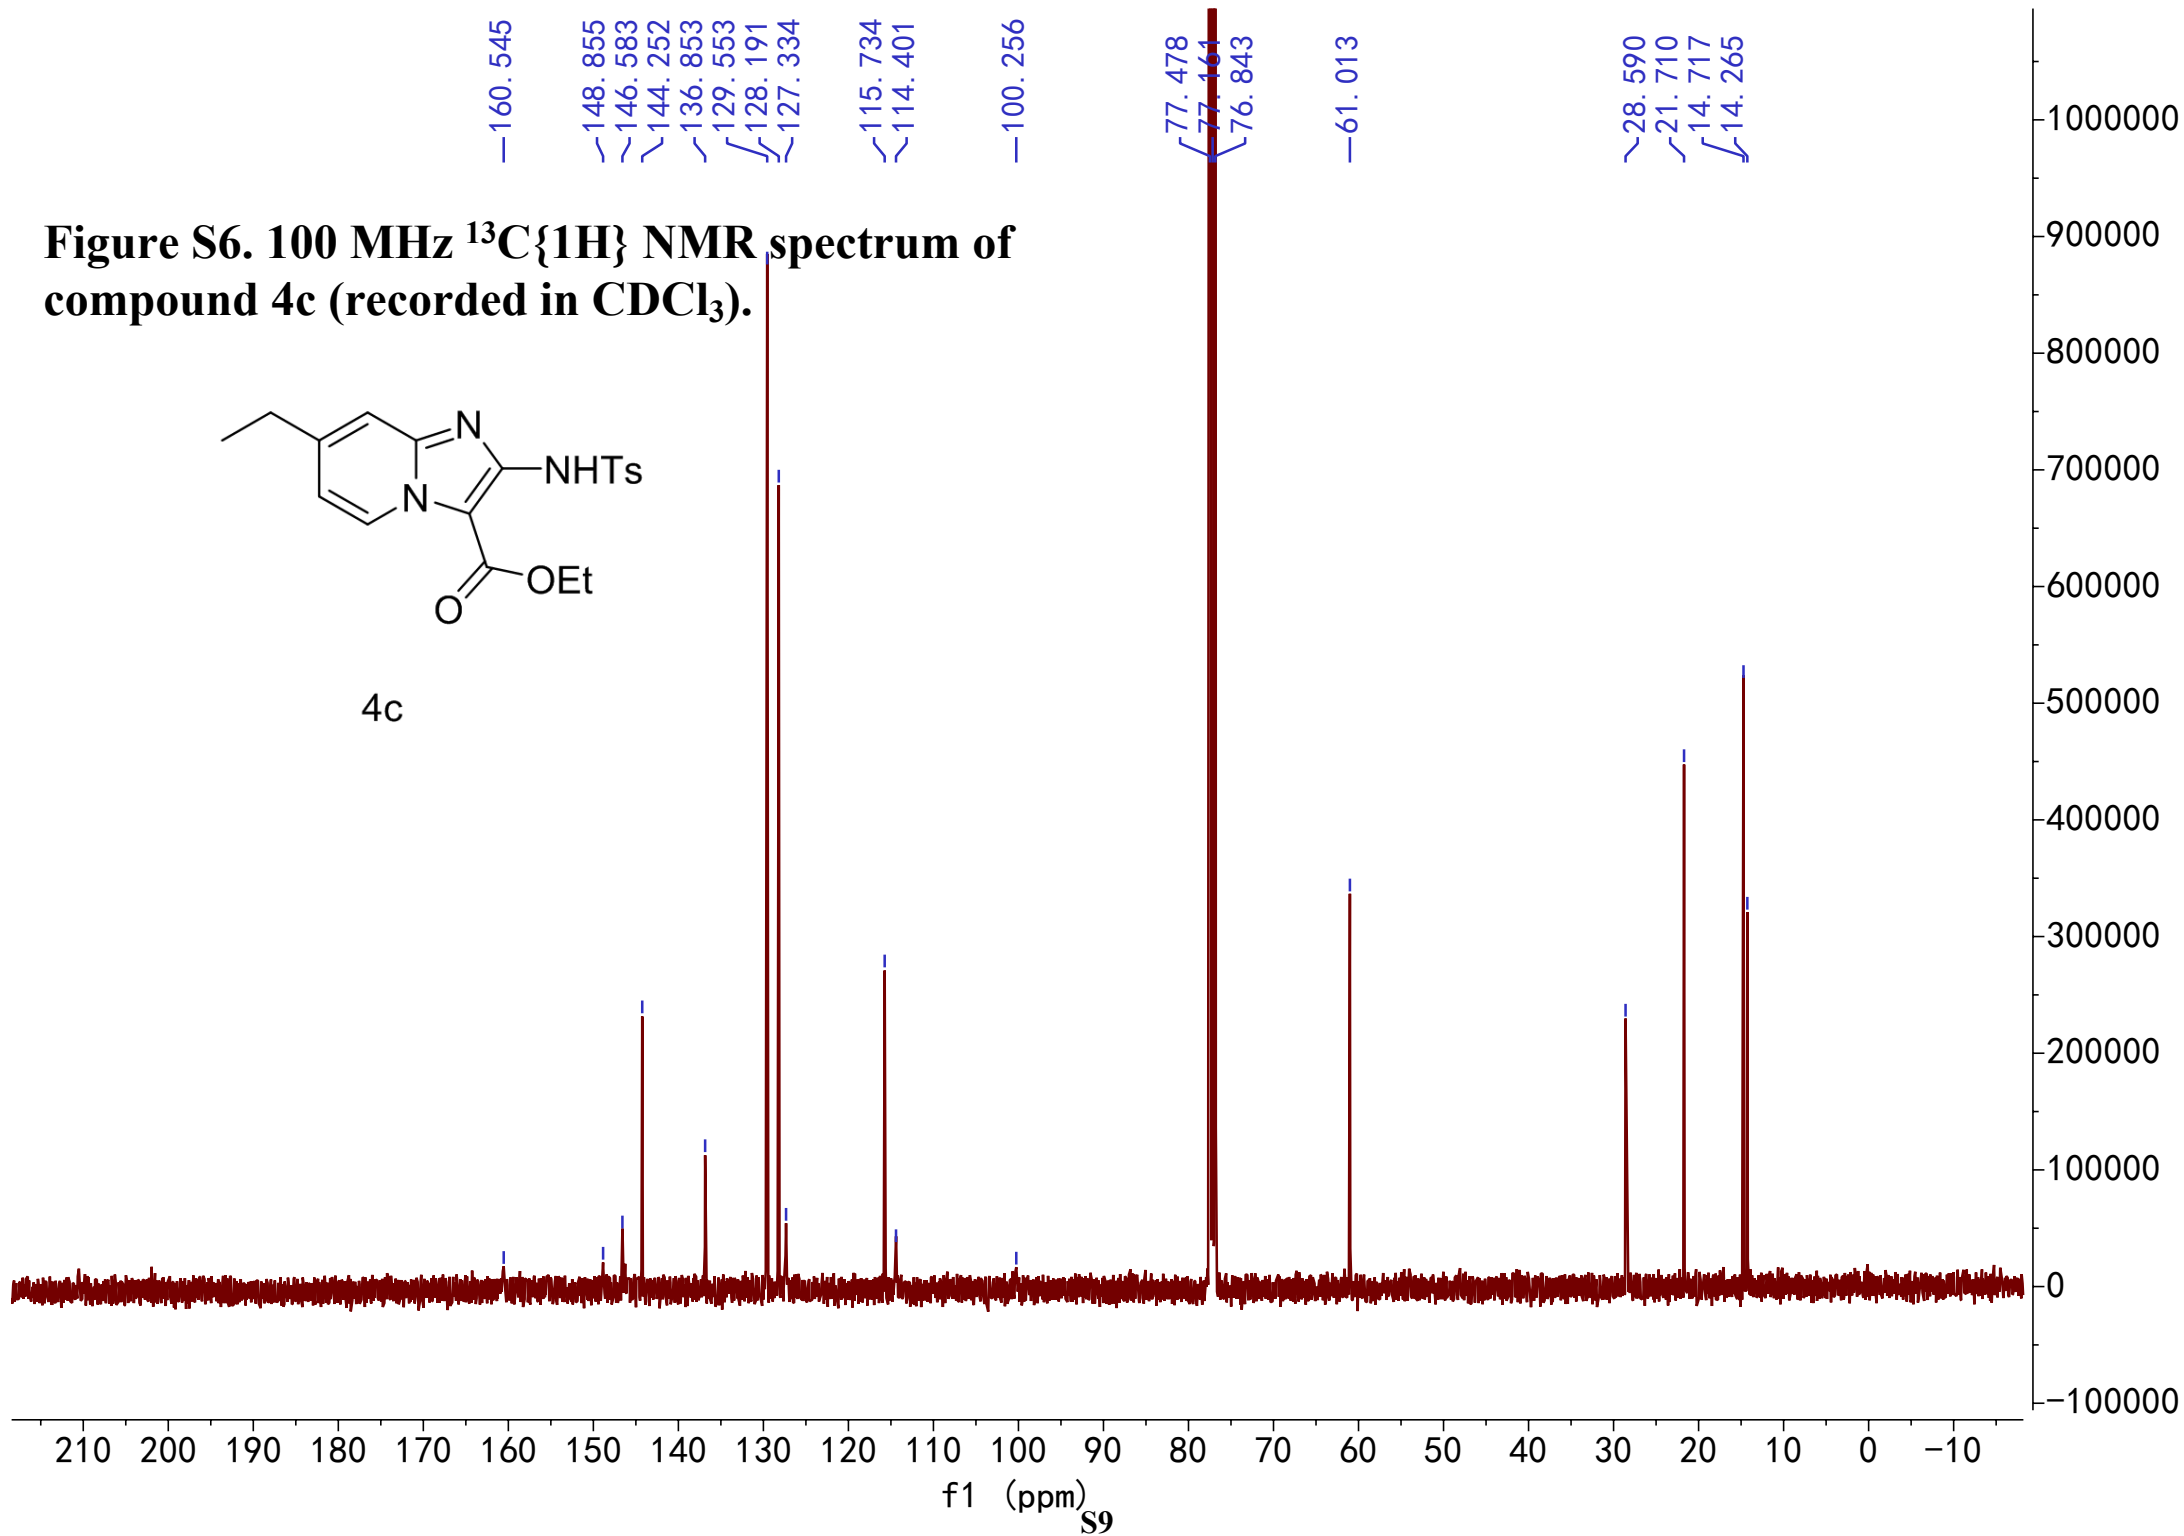

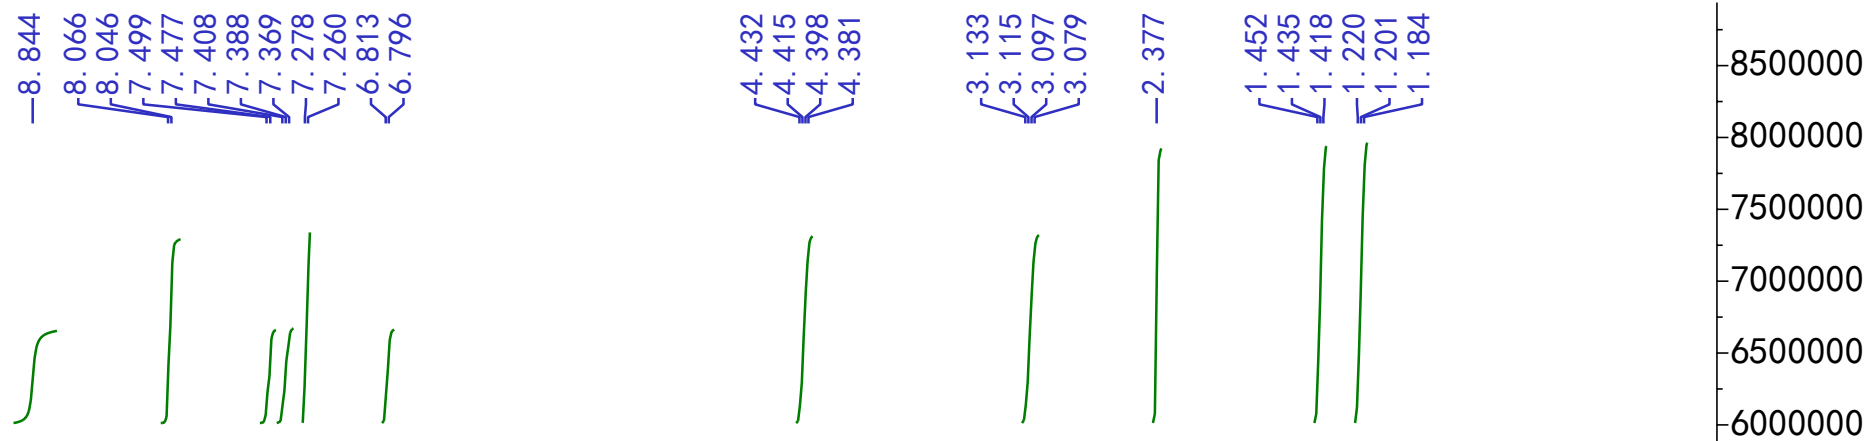

**Figure S7. 400 MHz  $^1\text{H}$  NMR spectrum of compound 4d (recorded in  $\text{CDCl}_3$ ).**

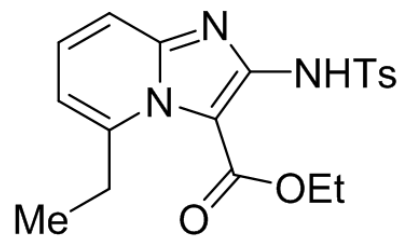

4d

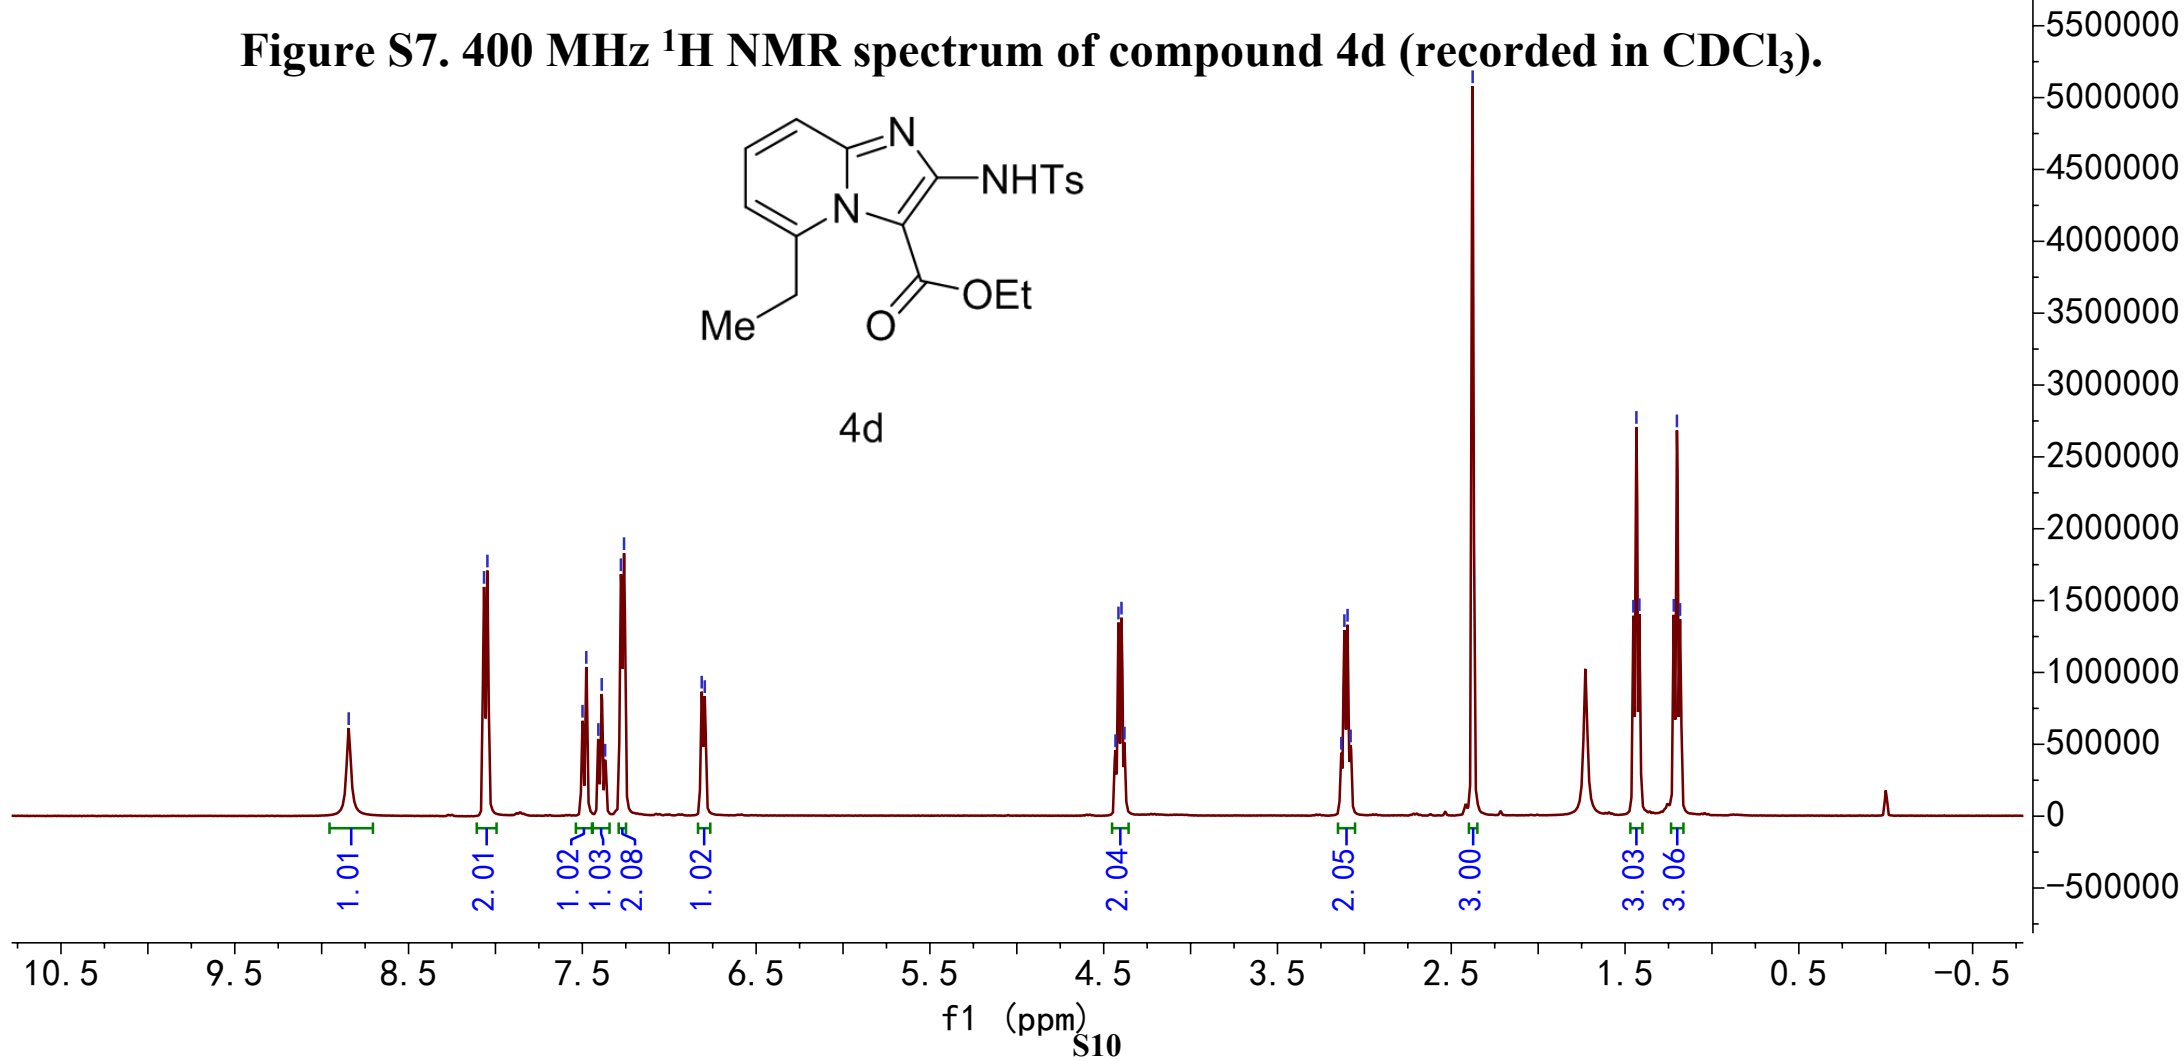

**Figure S8. 100 MHz  $^{13}\text{C}\{^1\text{H}\}$  NMR spectrum of compound 4d (recorded in  $\text{CDCl}_3$ ).**

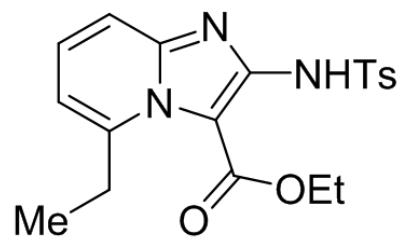

4d

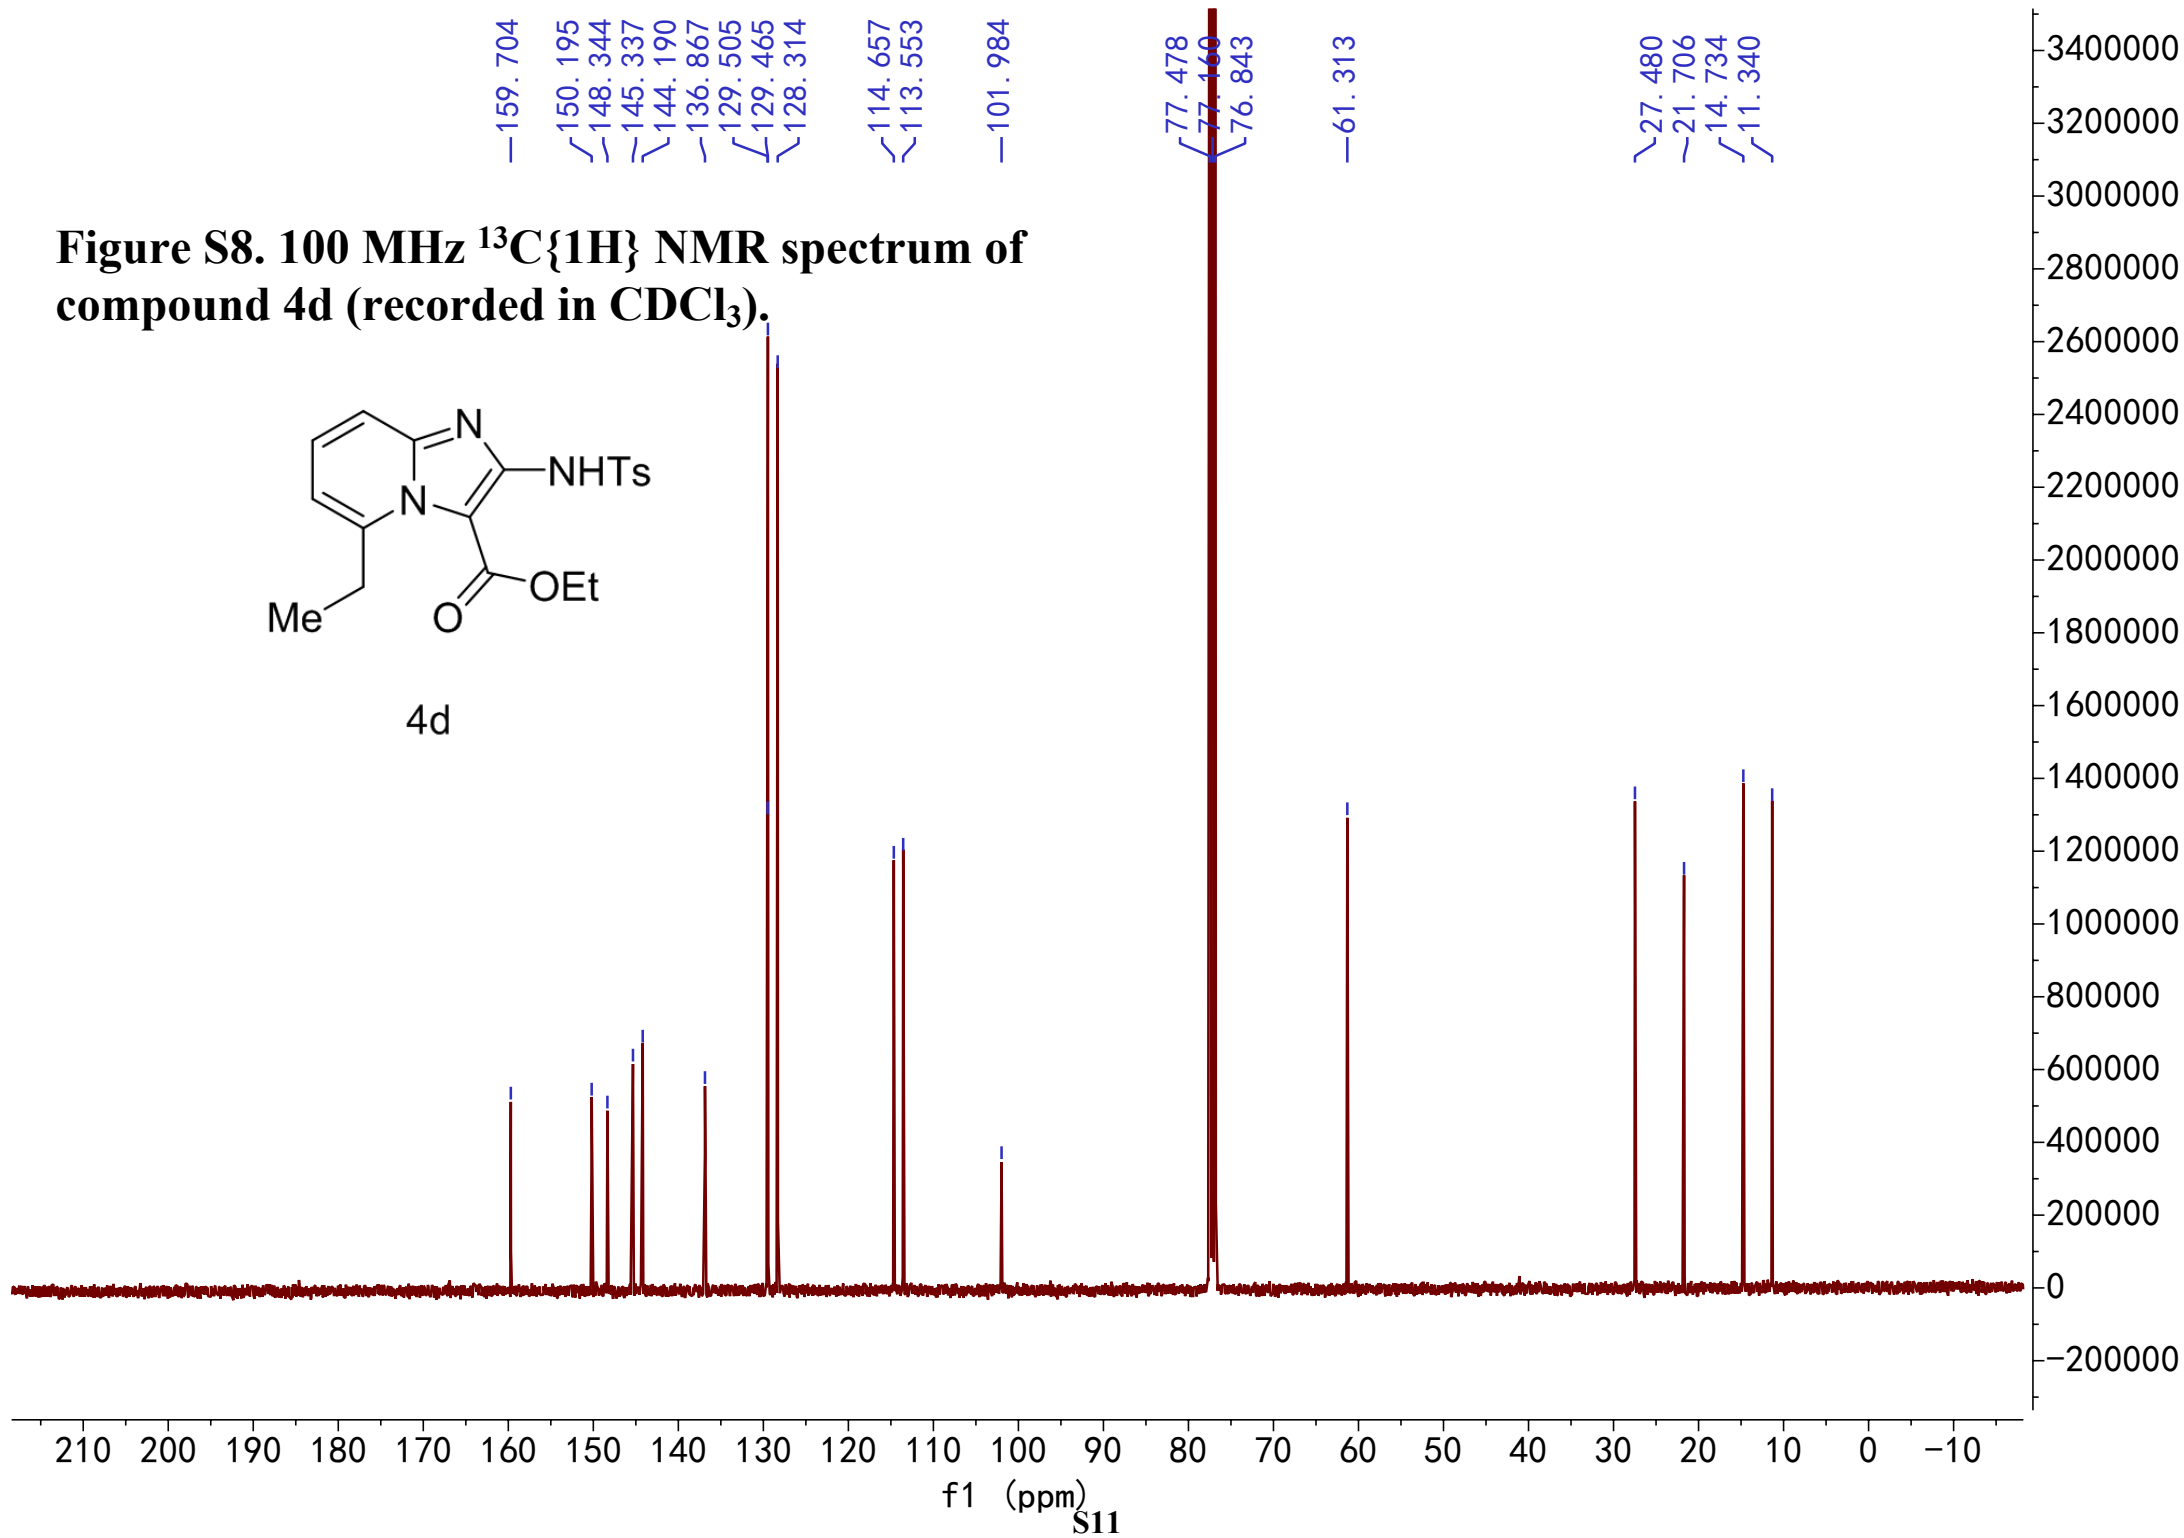

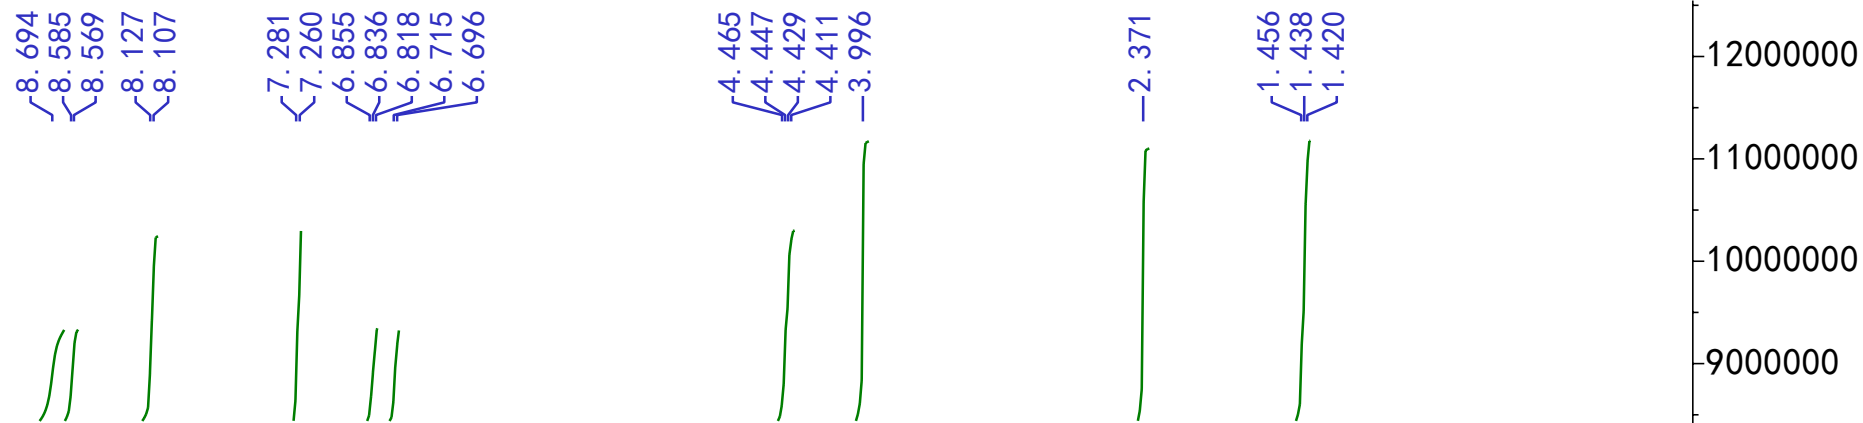

**Figure S9. 400 MHz  $^1\text{H}$  NMR spectrum of compound 4e (recorded in  $\text{CDCl}_3$ ).**

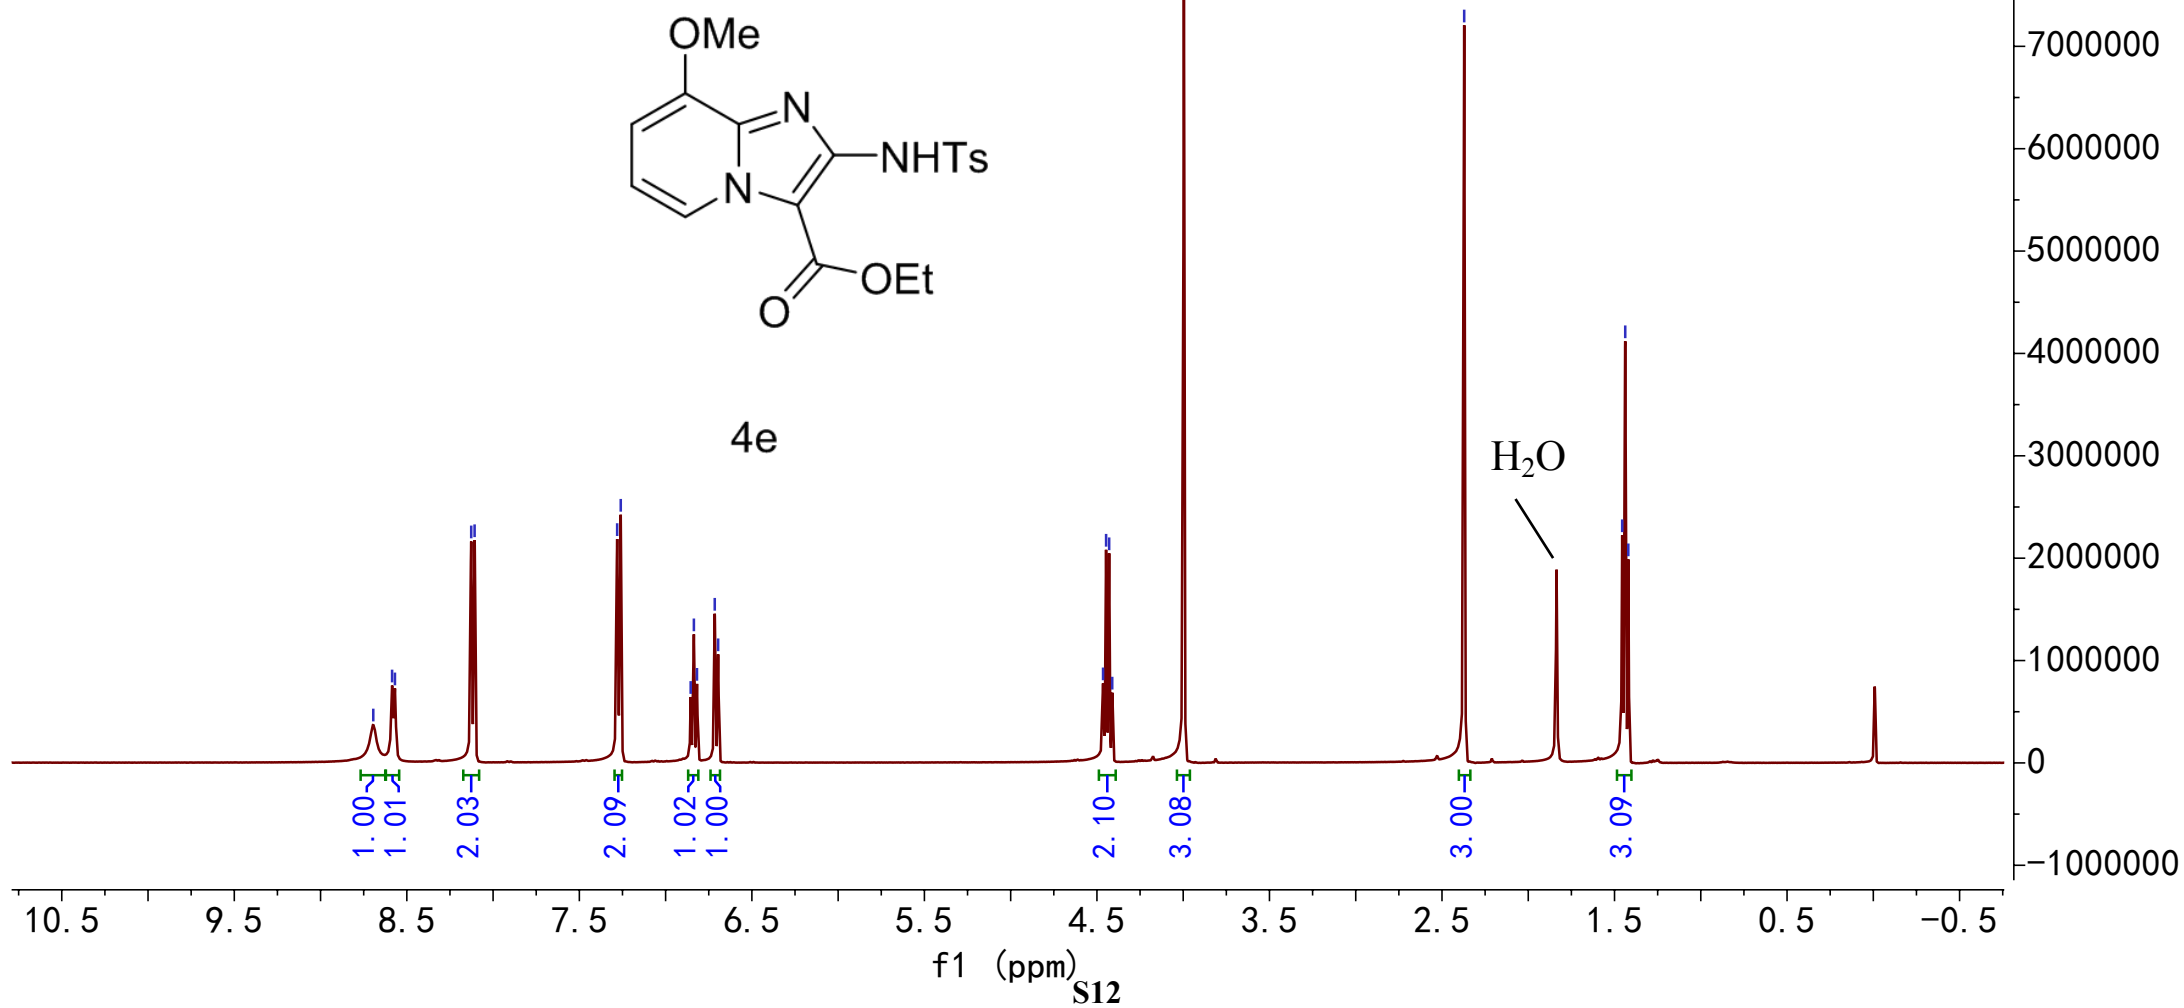

**Figure S10. 100 MHz  $^{13}\text{C}\{^1\text{H}\}$  NMR spectrum of compound 4e (recorded in  $\text{CDCl}_3$ ).**

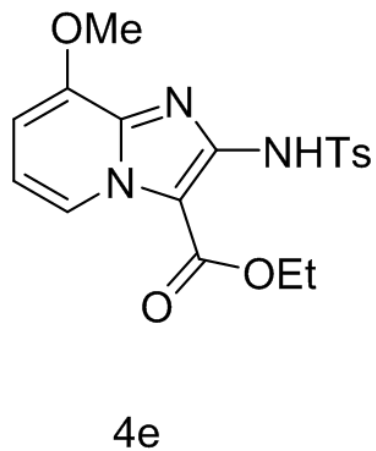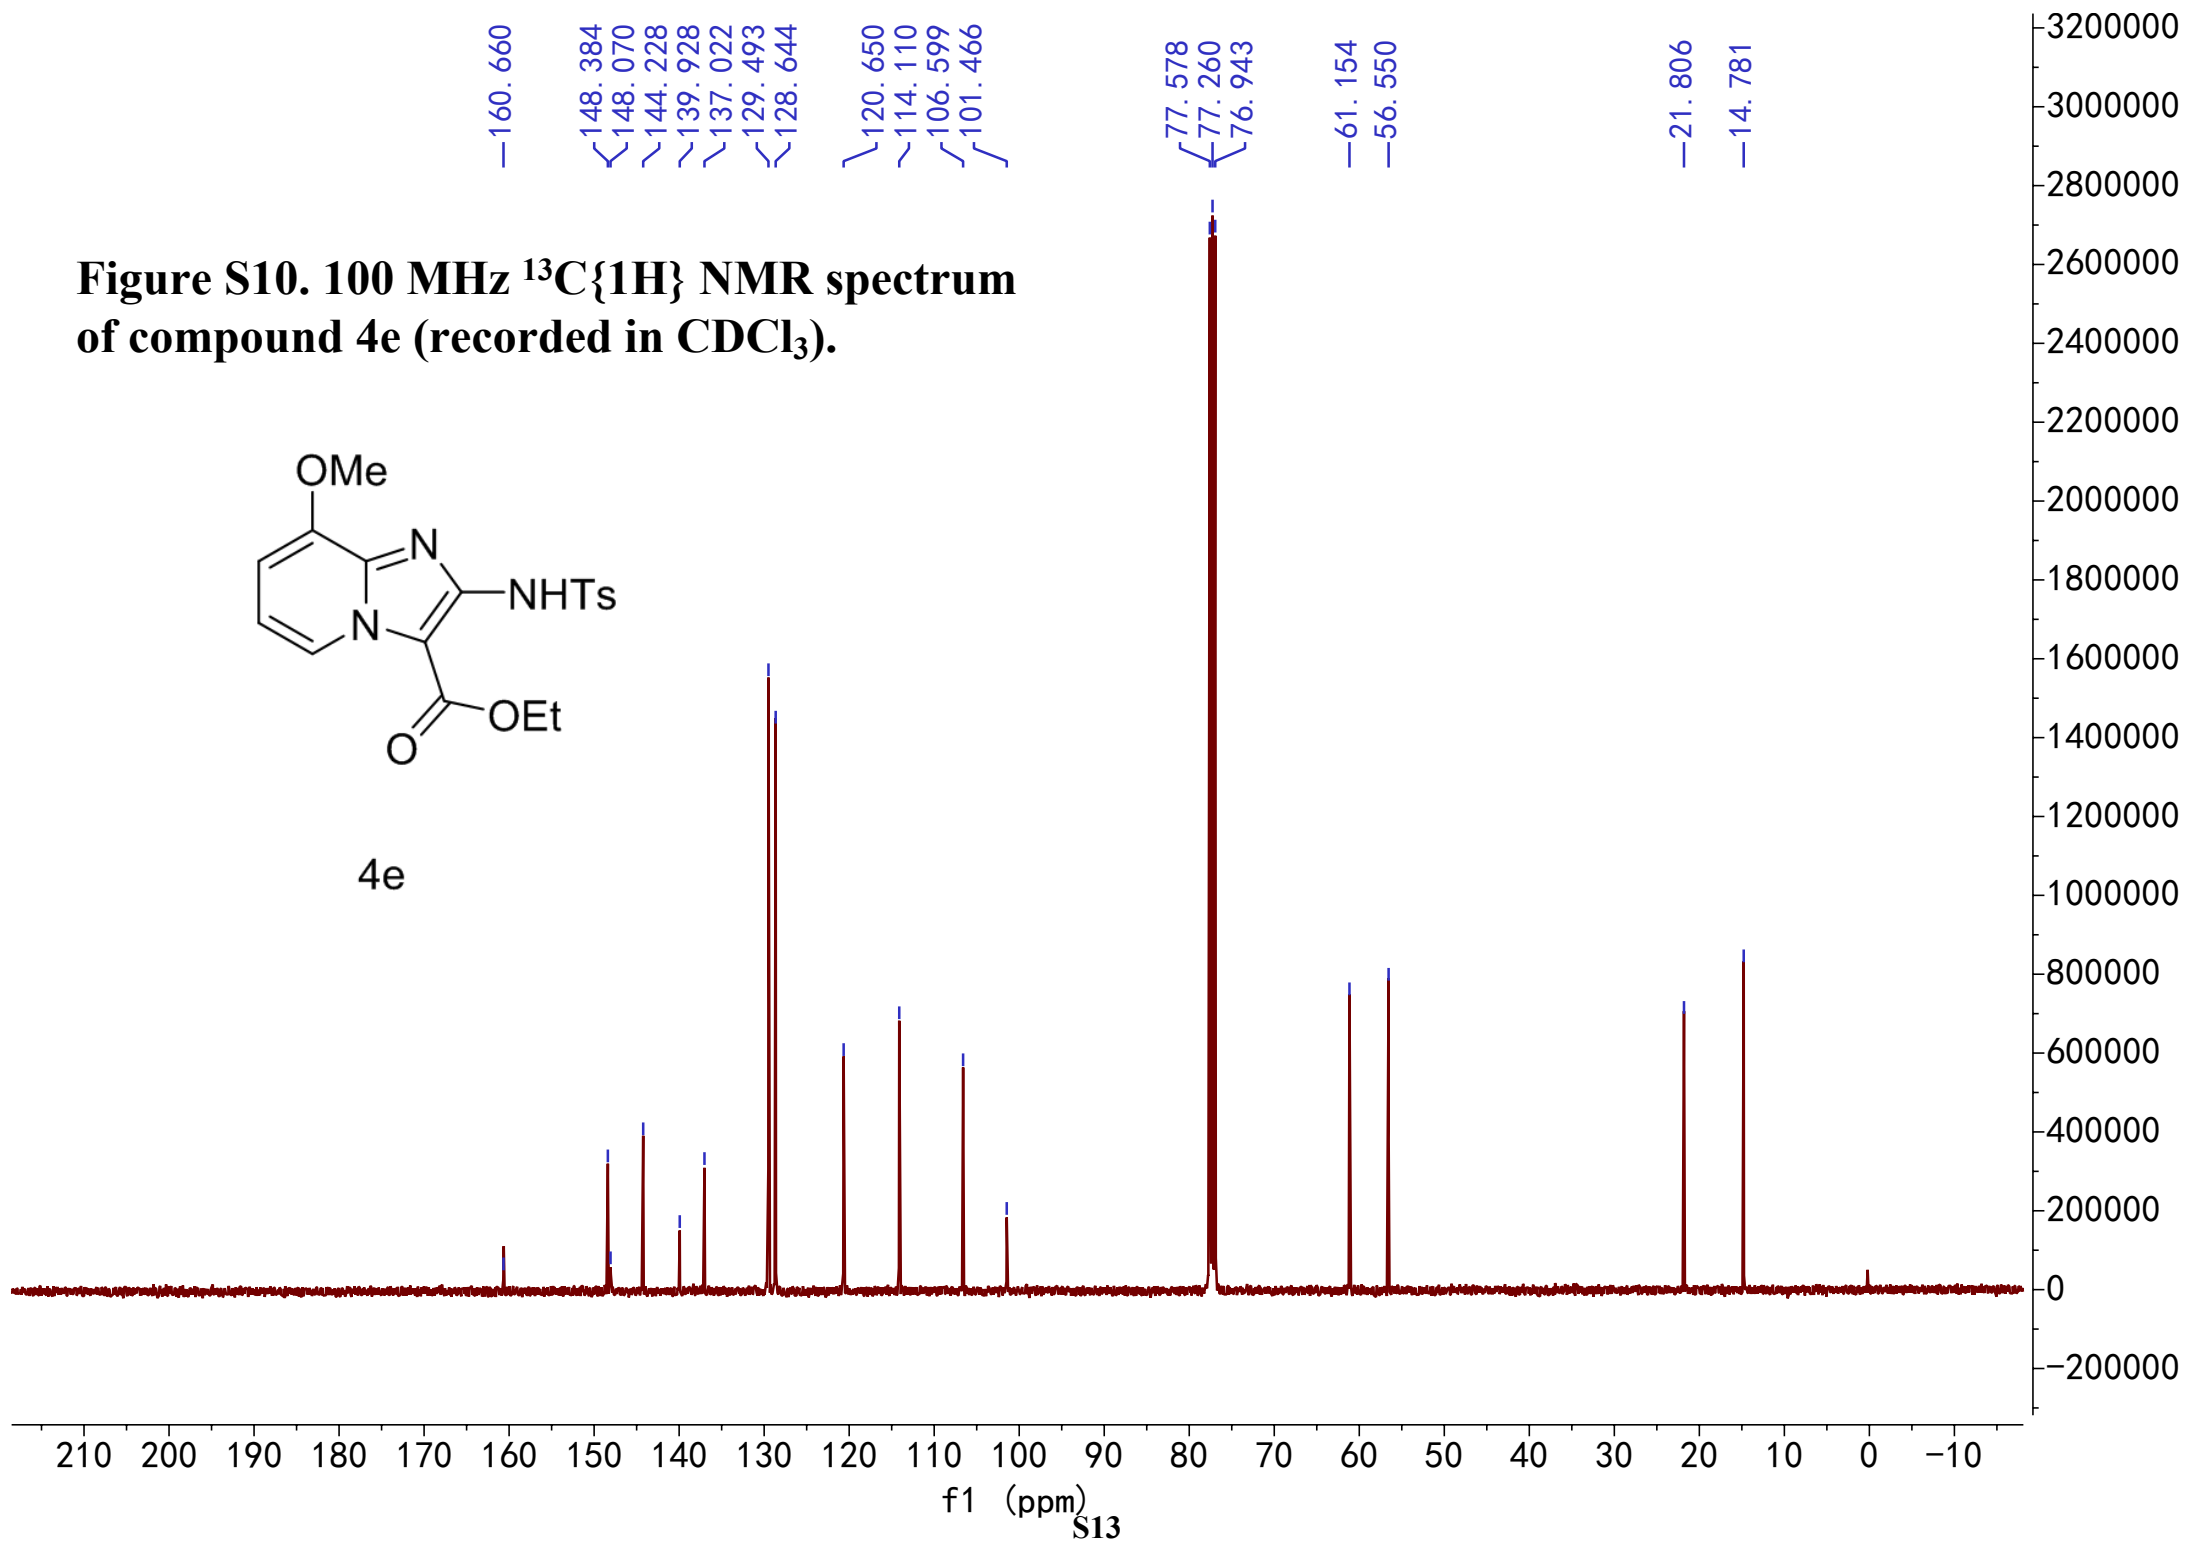

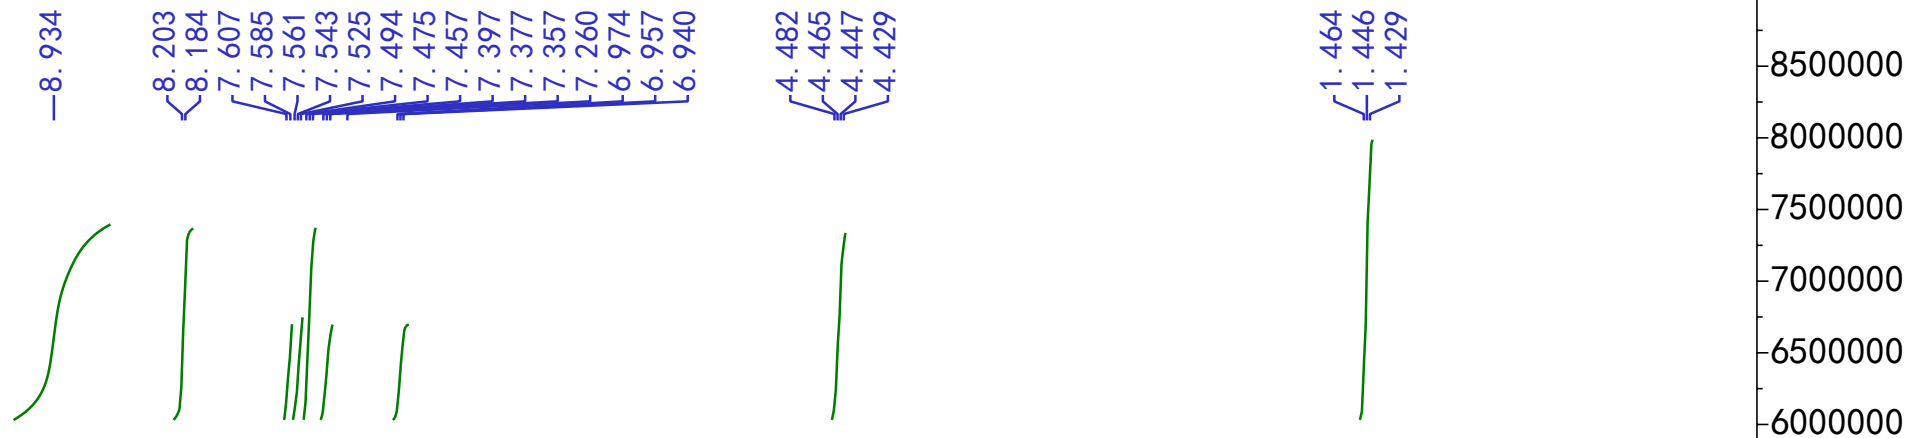

**Figure S11. 400 MHz  $^1\text{H}$  NMR spectrum of compound 4f (recorded in  $\text{CDCl}_3$ ).**

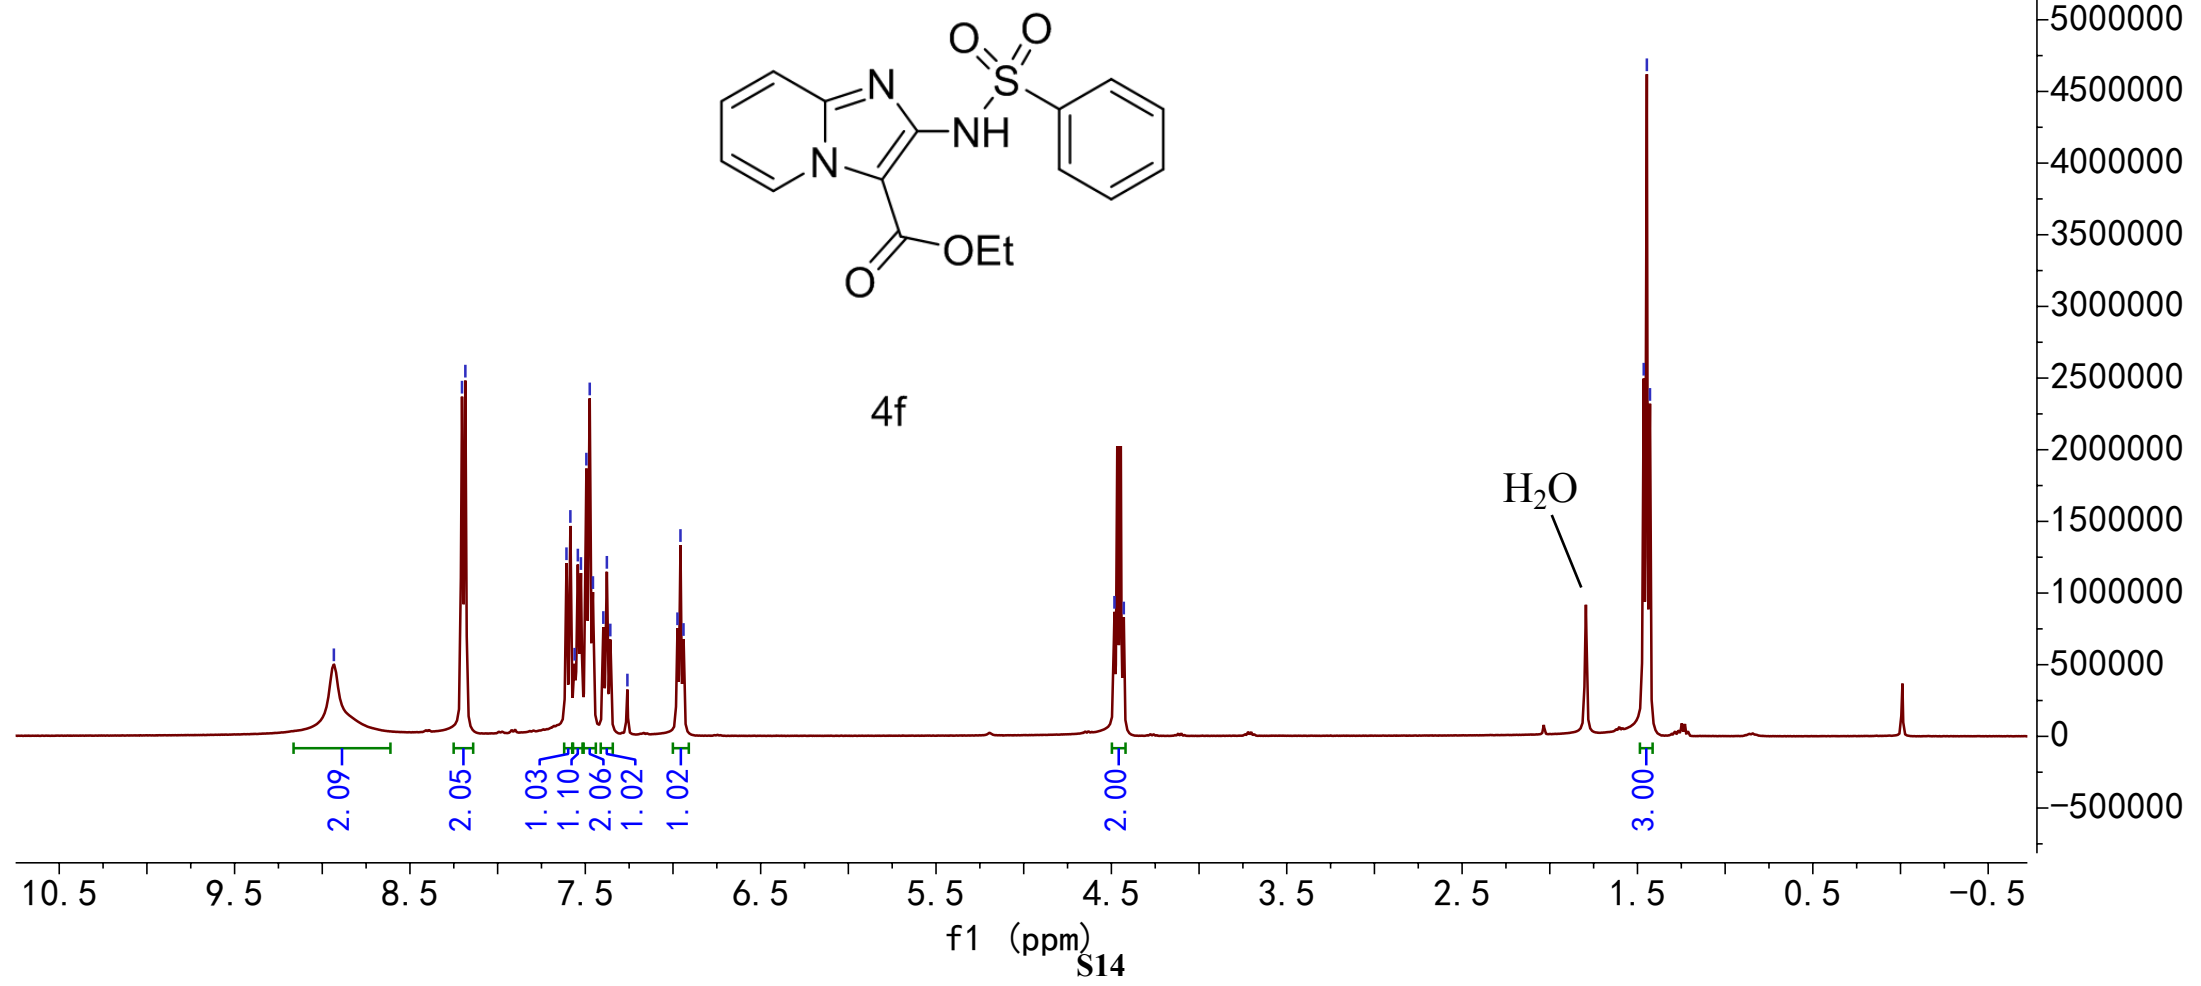

**Figure S12. 100 MHz  $^{13}\text{C}\{^1\text{H}\}$  NMR spectrum of compound 4f (recorded in  $\text{CDCl}_3$ ).**

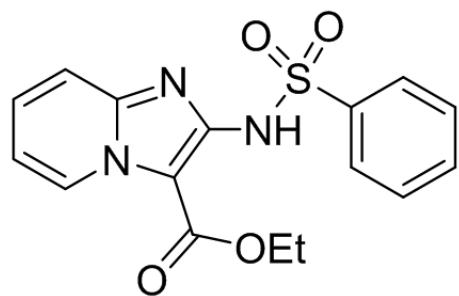

4f

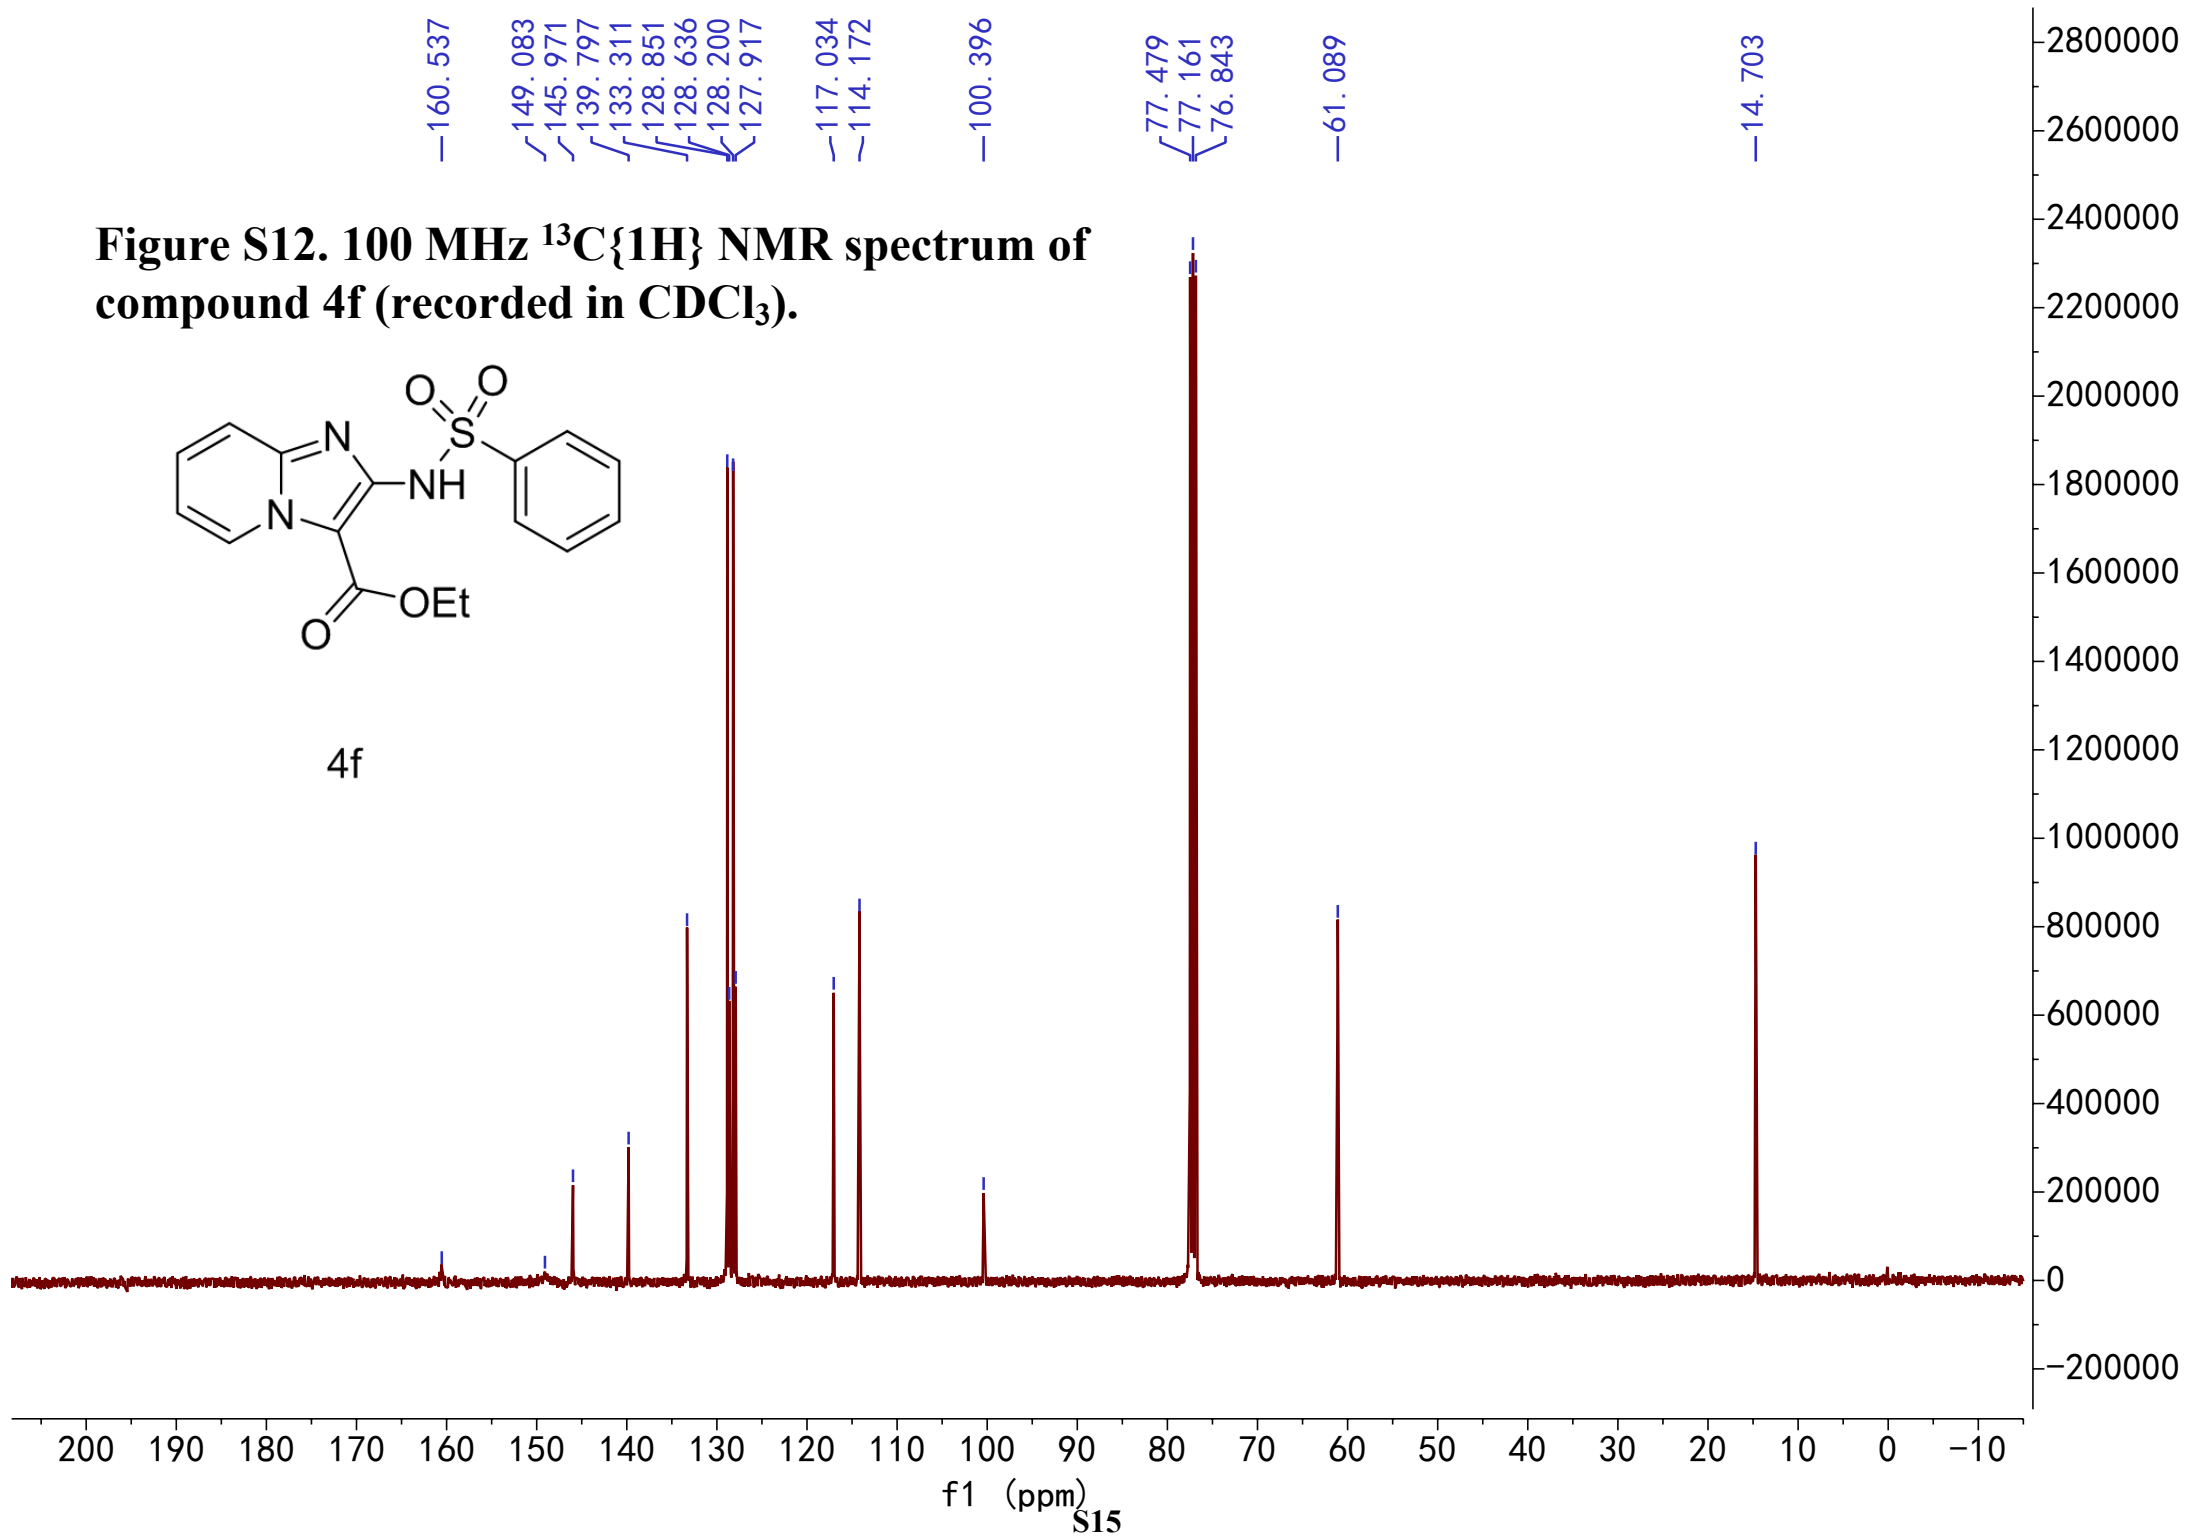

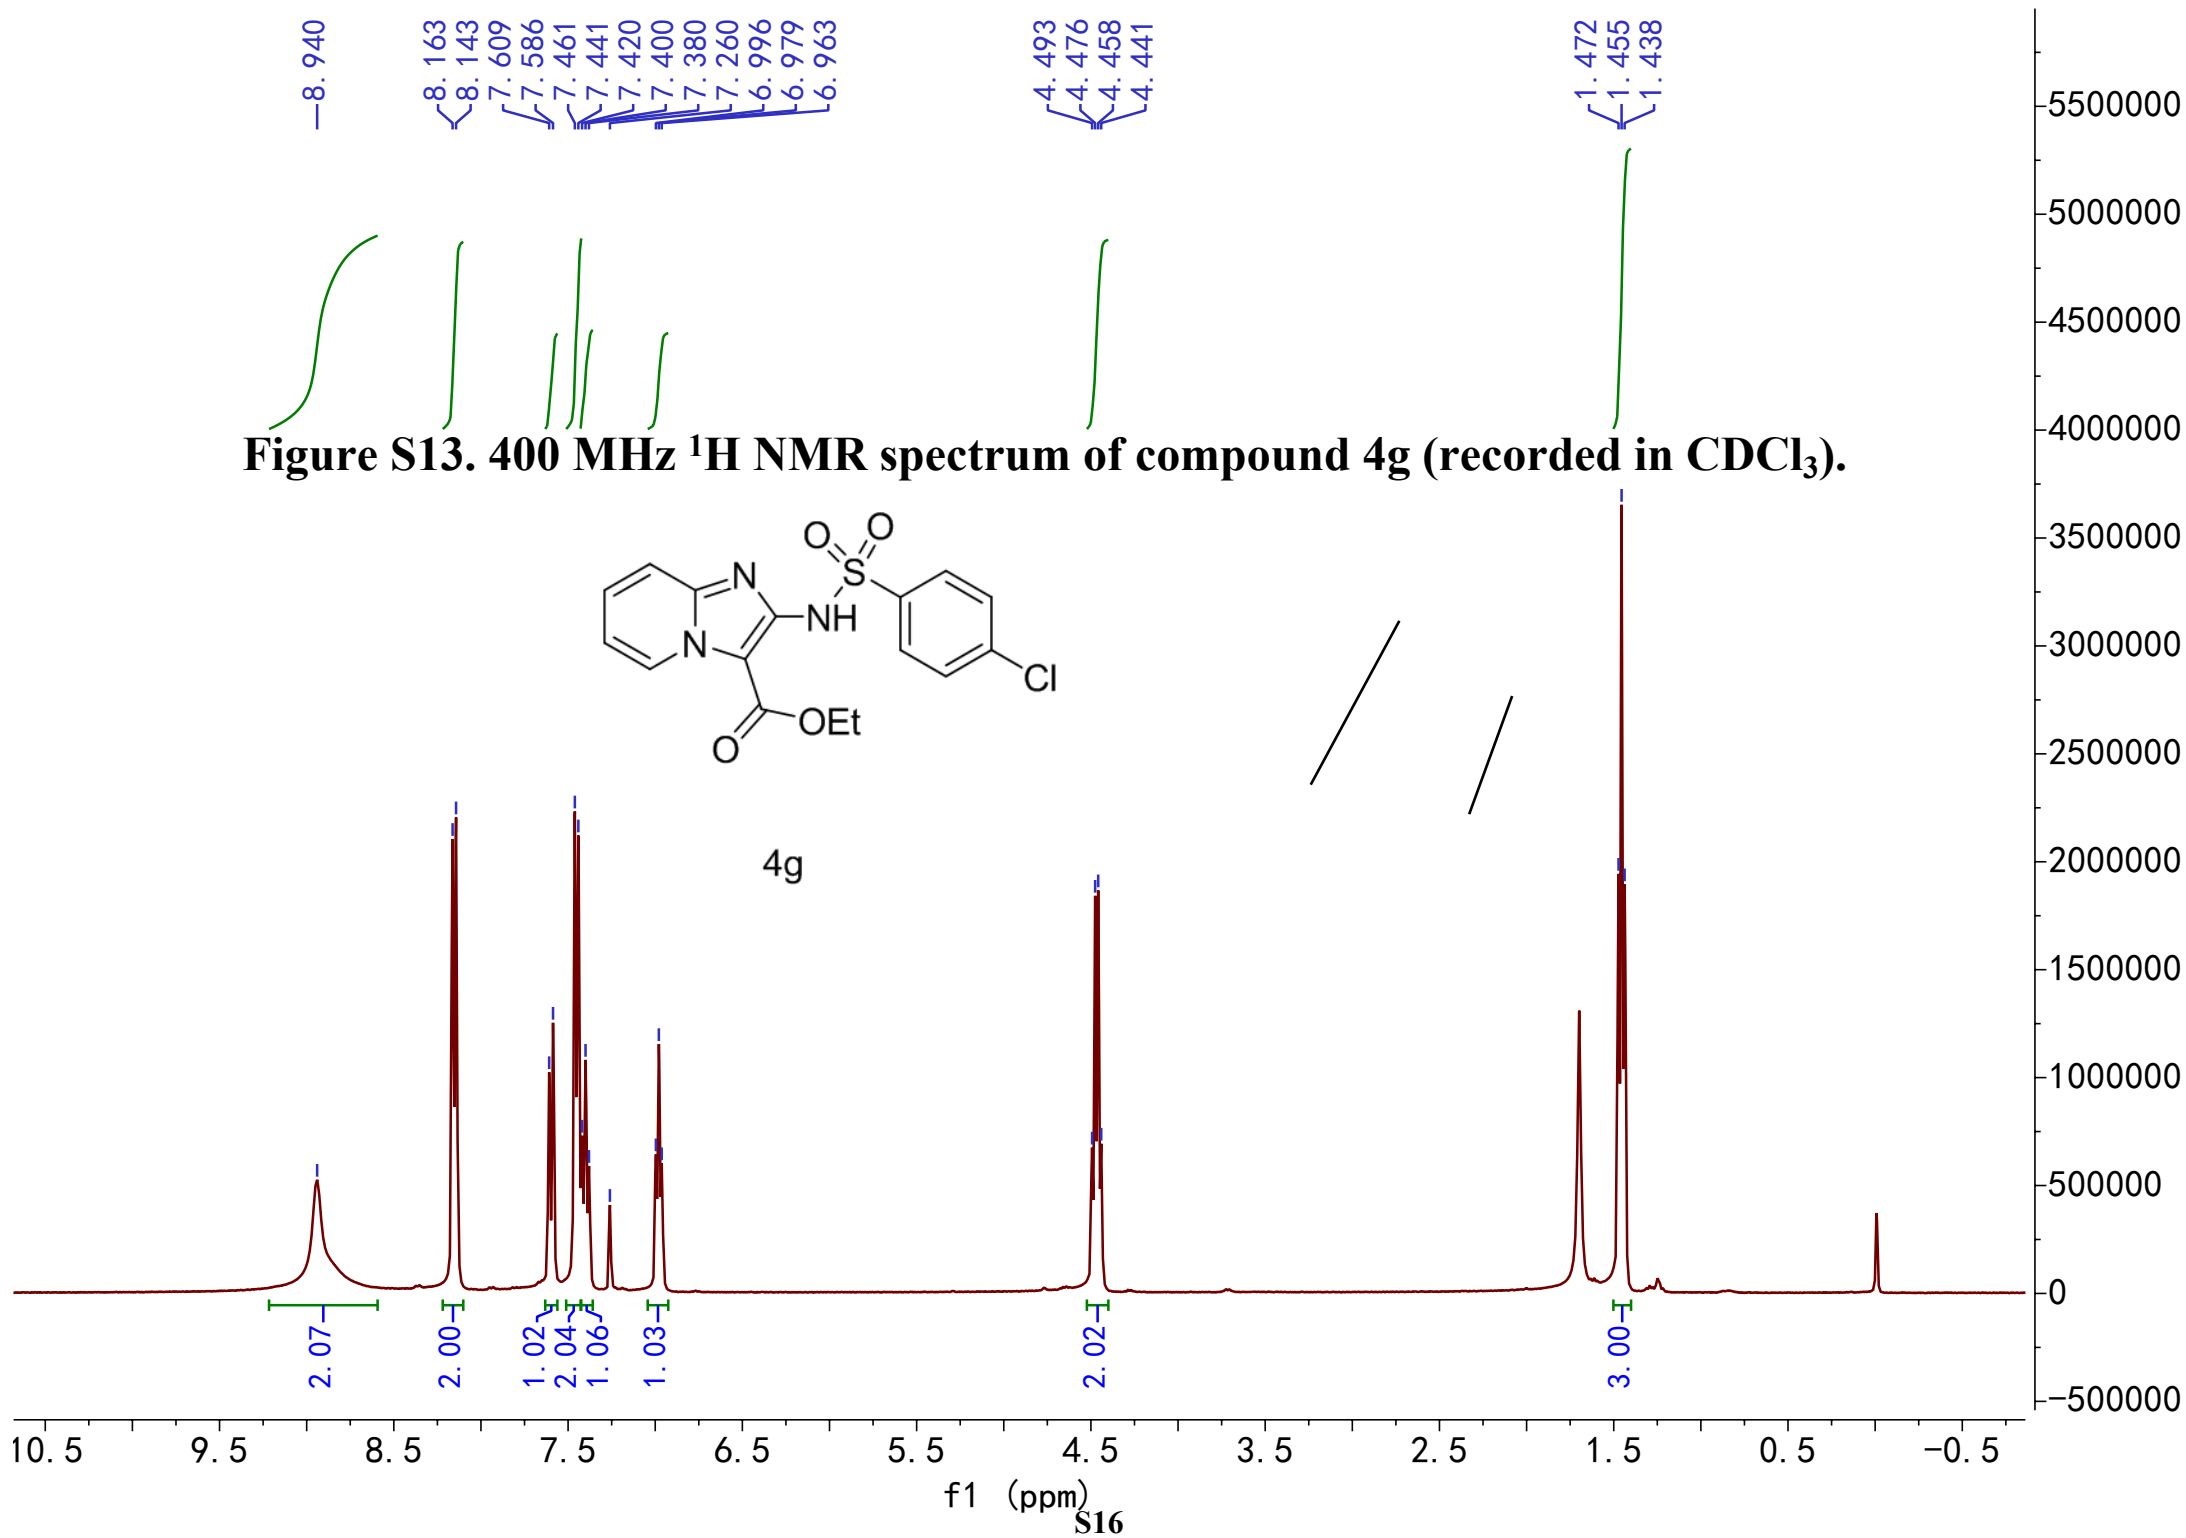



**Figure S14. 100 MHz  $^{13}\text{C}\{^1\text{H}\}$  NMR spectrum of compound 4g (recorded in  $\text{CDCl}_3$ ).**

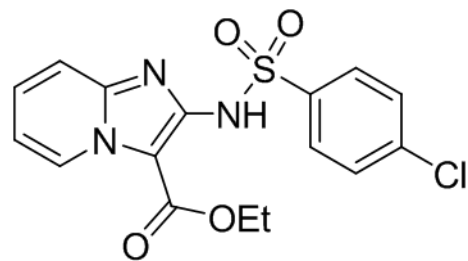

4g

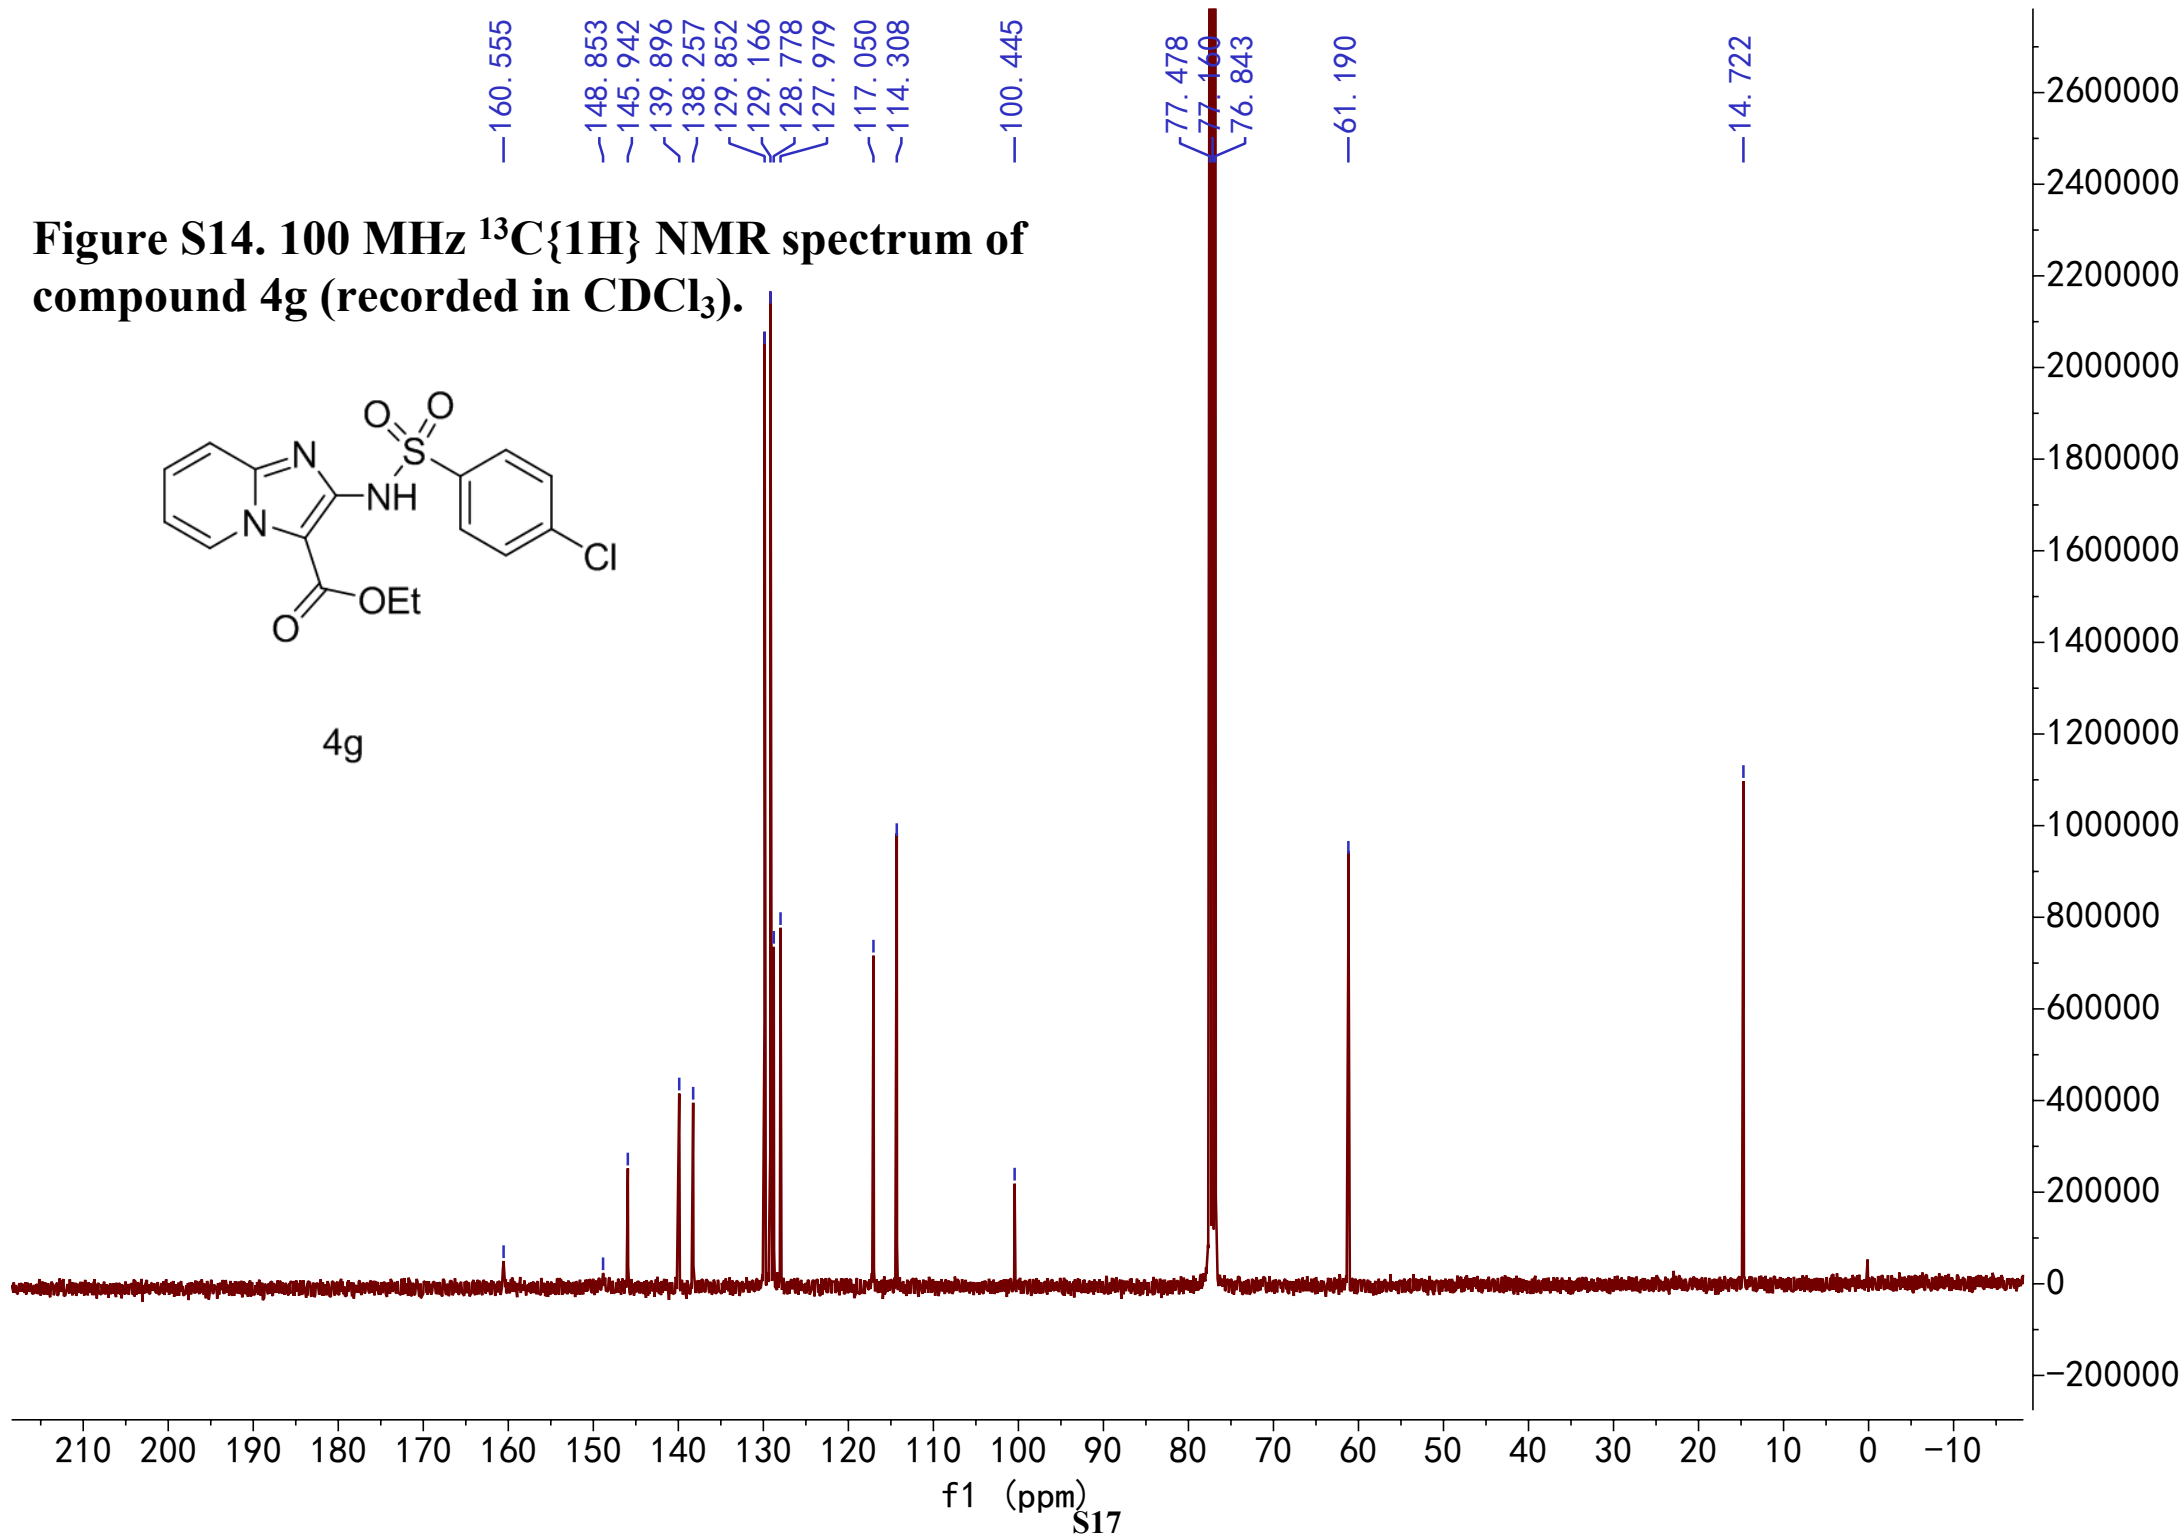

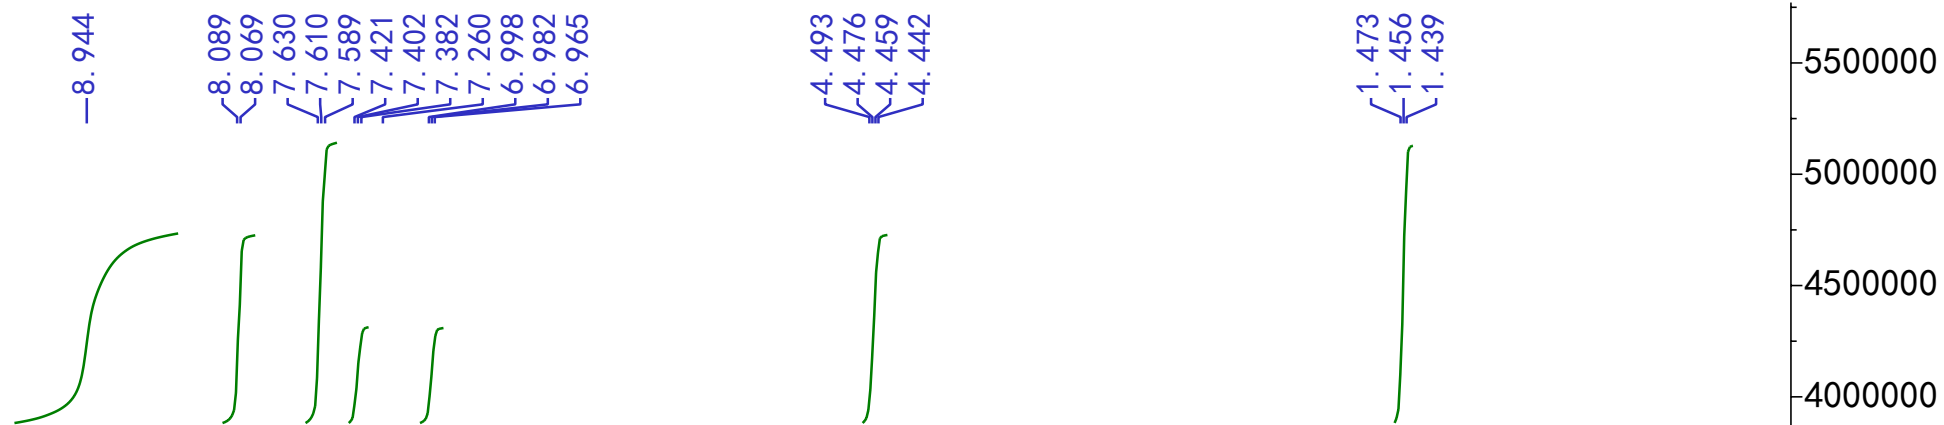

**Figure S15. 400 MHz  $^1\text{H}$  NMR spectrum of compound 4h (recorded in  $\text{CDCl}_3$ ).**

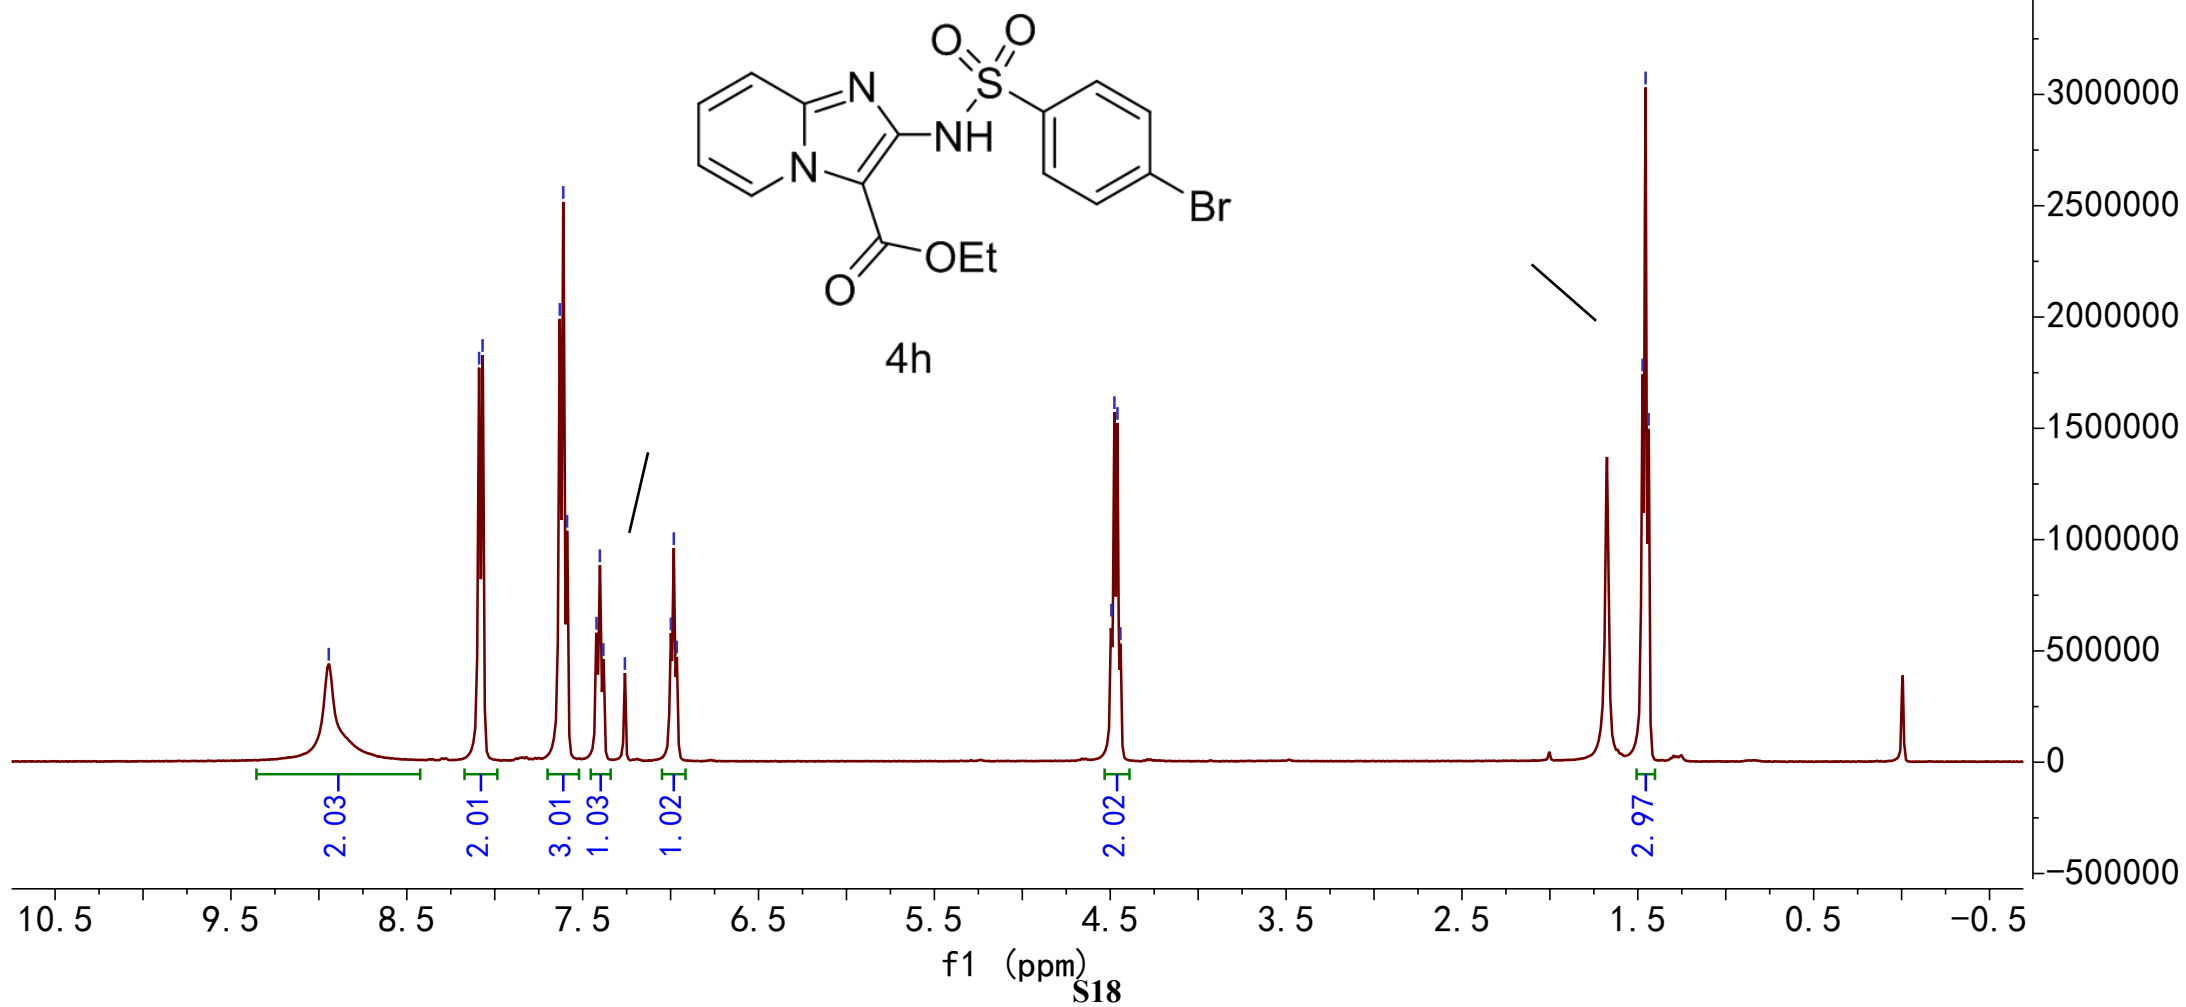

**Figure S16. 100 MHz  $^{13}\text{C}\{^1\text{H}\}$  NMR spectrum of compound 4h (recorded in  $\text{CDCl}_3$ ).**

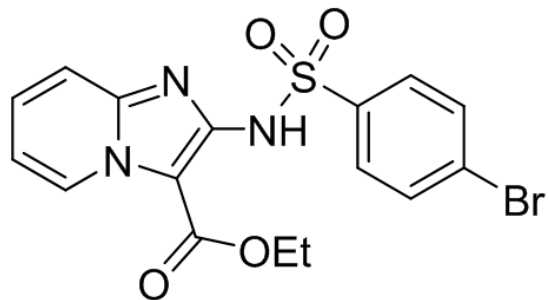

4h

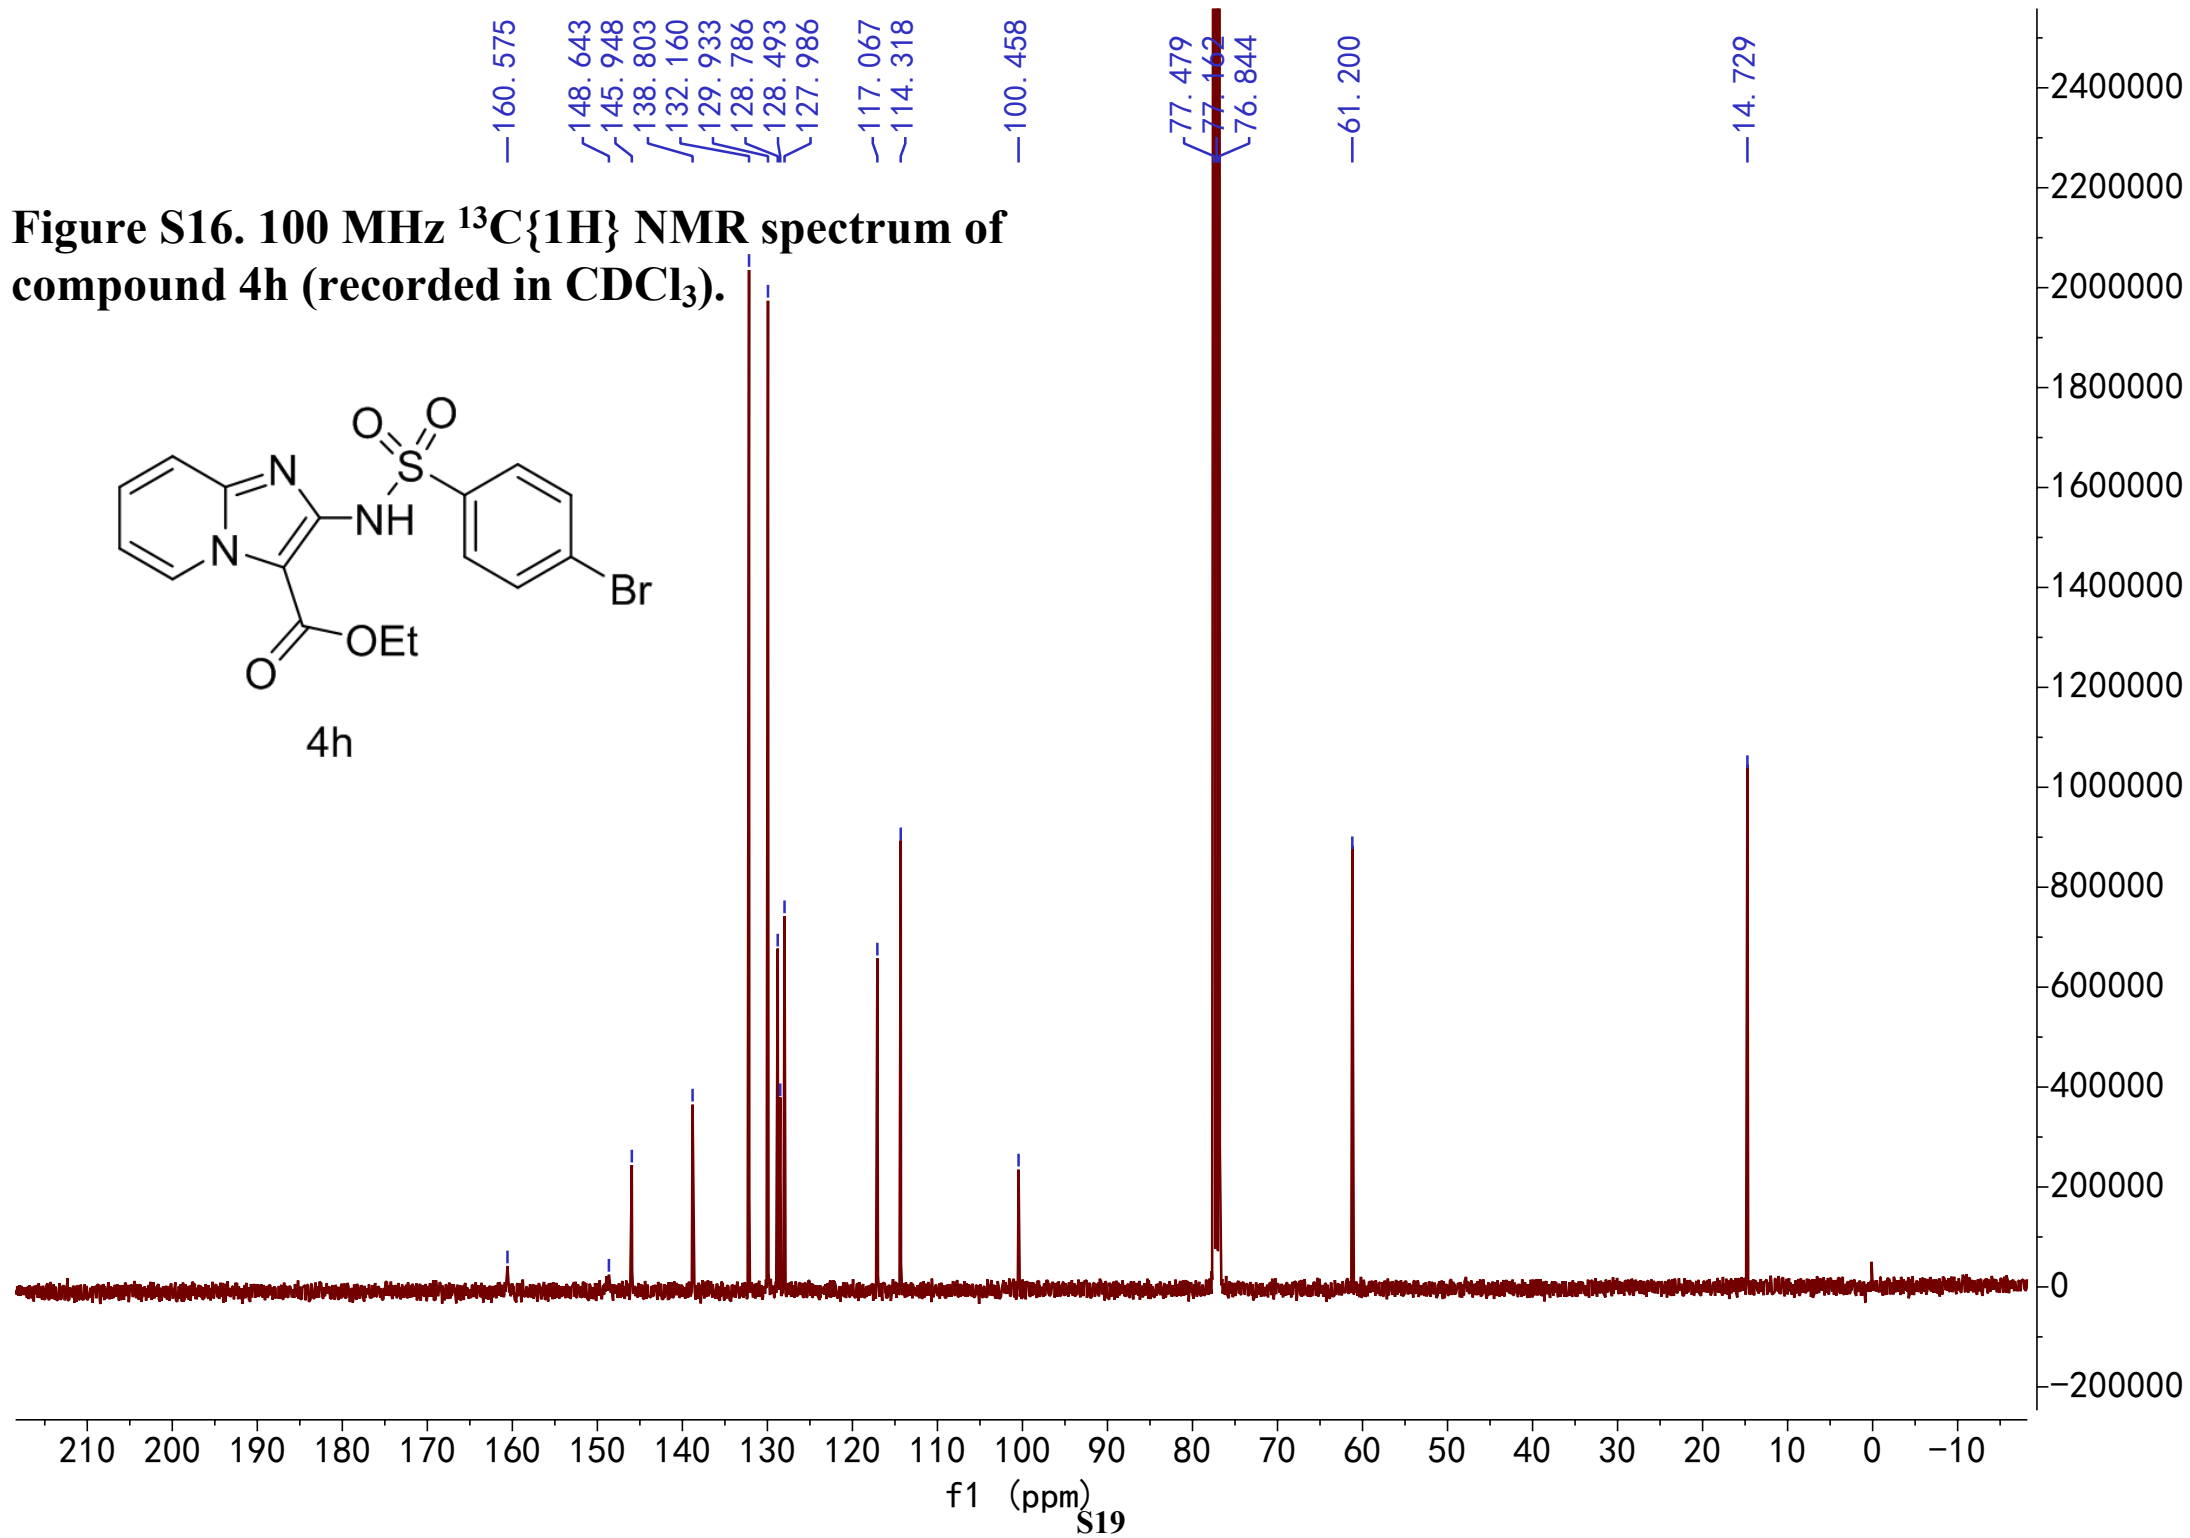

8.953  
8.937  
8.358  
8.338  
7.766  
7.746  
7.623  
7.601  
7.441  
7.421  
7.402  
7.260  
7.018  
7.002  
6.985

4.501  
4.485  
4.467  
4.450

1.477  
1.460  
1.442

Figure S17. 400 MHz <sup>1</sup>H NMR spectrum of compound 4i (recorded in CDCl<sub>3</sub>).

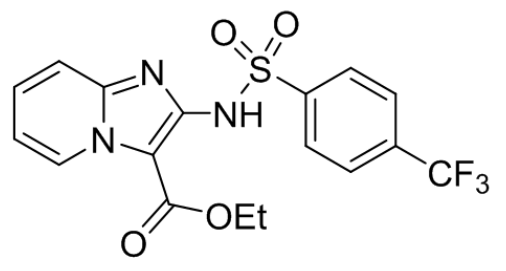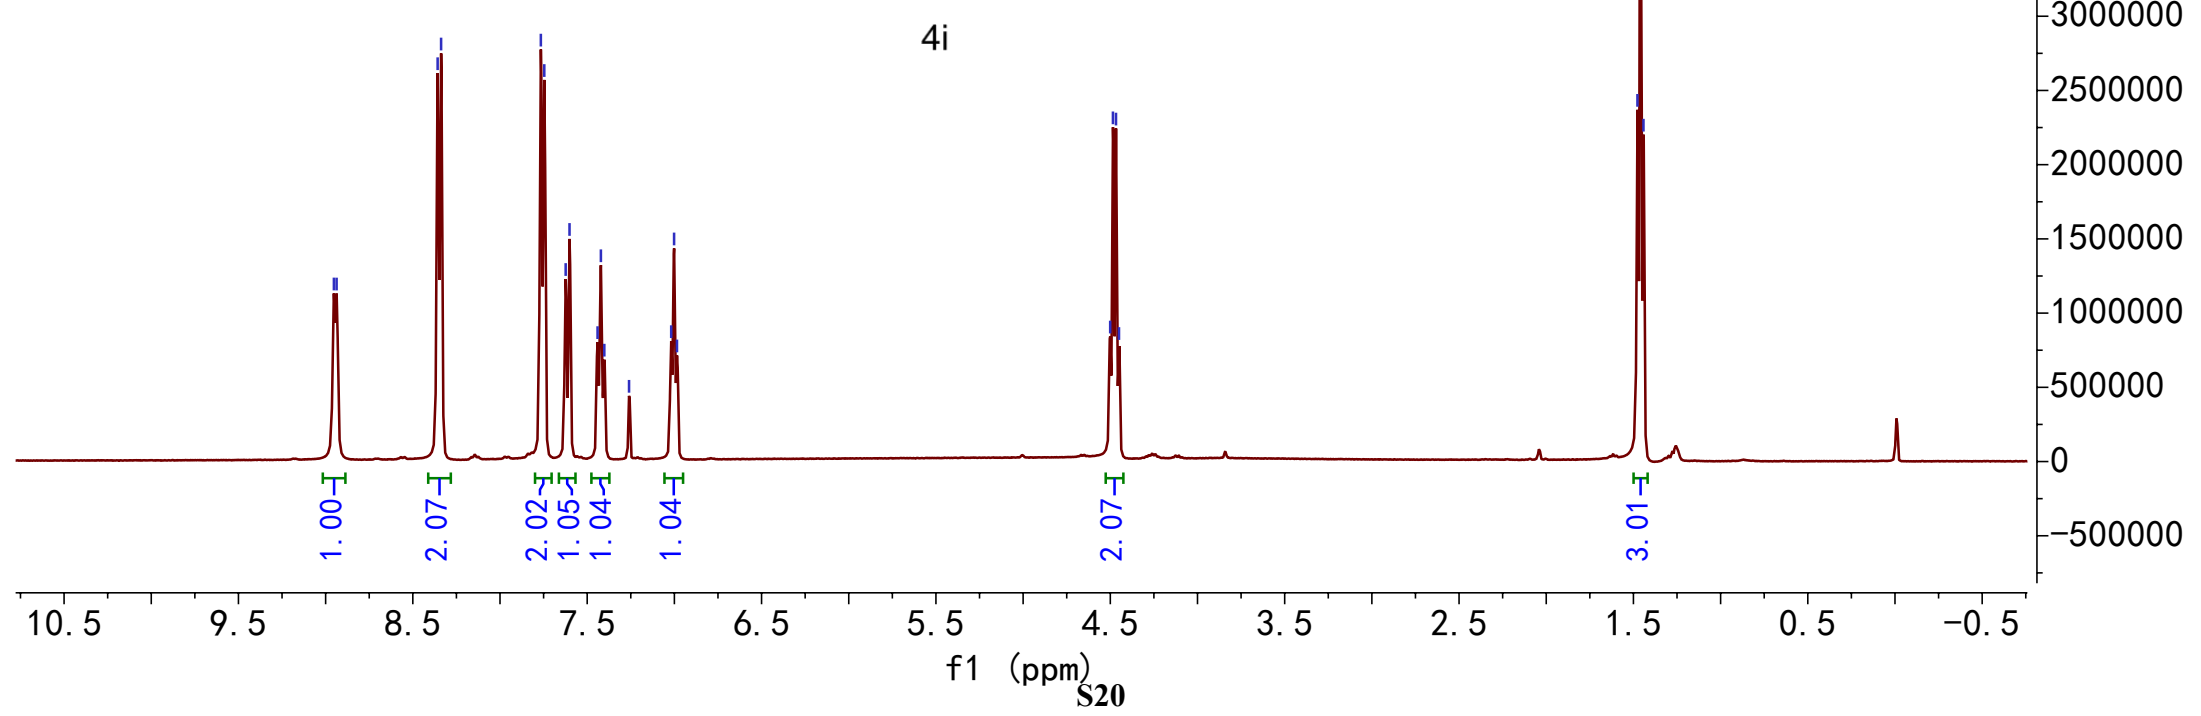

**Figure S18. 100 MHz  $^{13}\text{C}\{^1\text{H}\}$  NMR spectrum of compound 4i (recorded in  $\text{CDCl}_3$ ).**

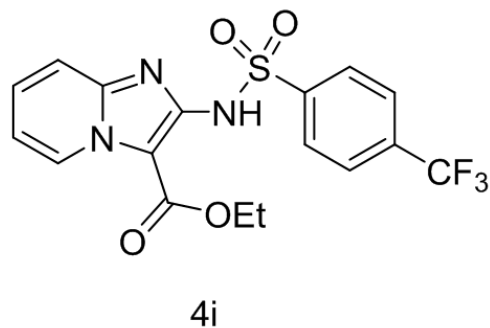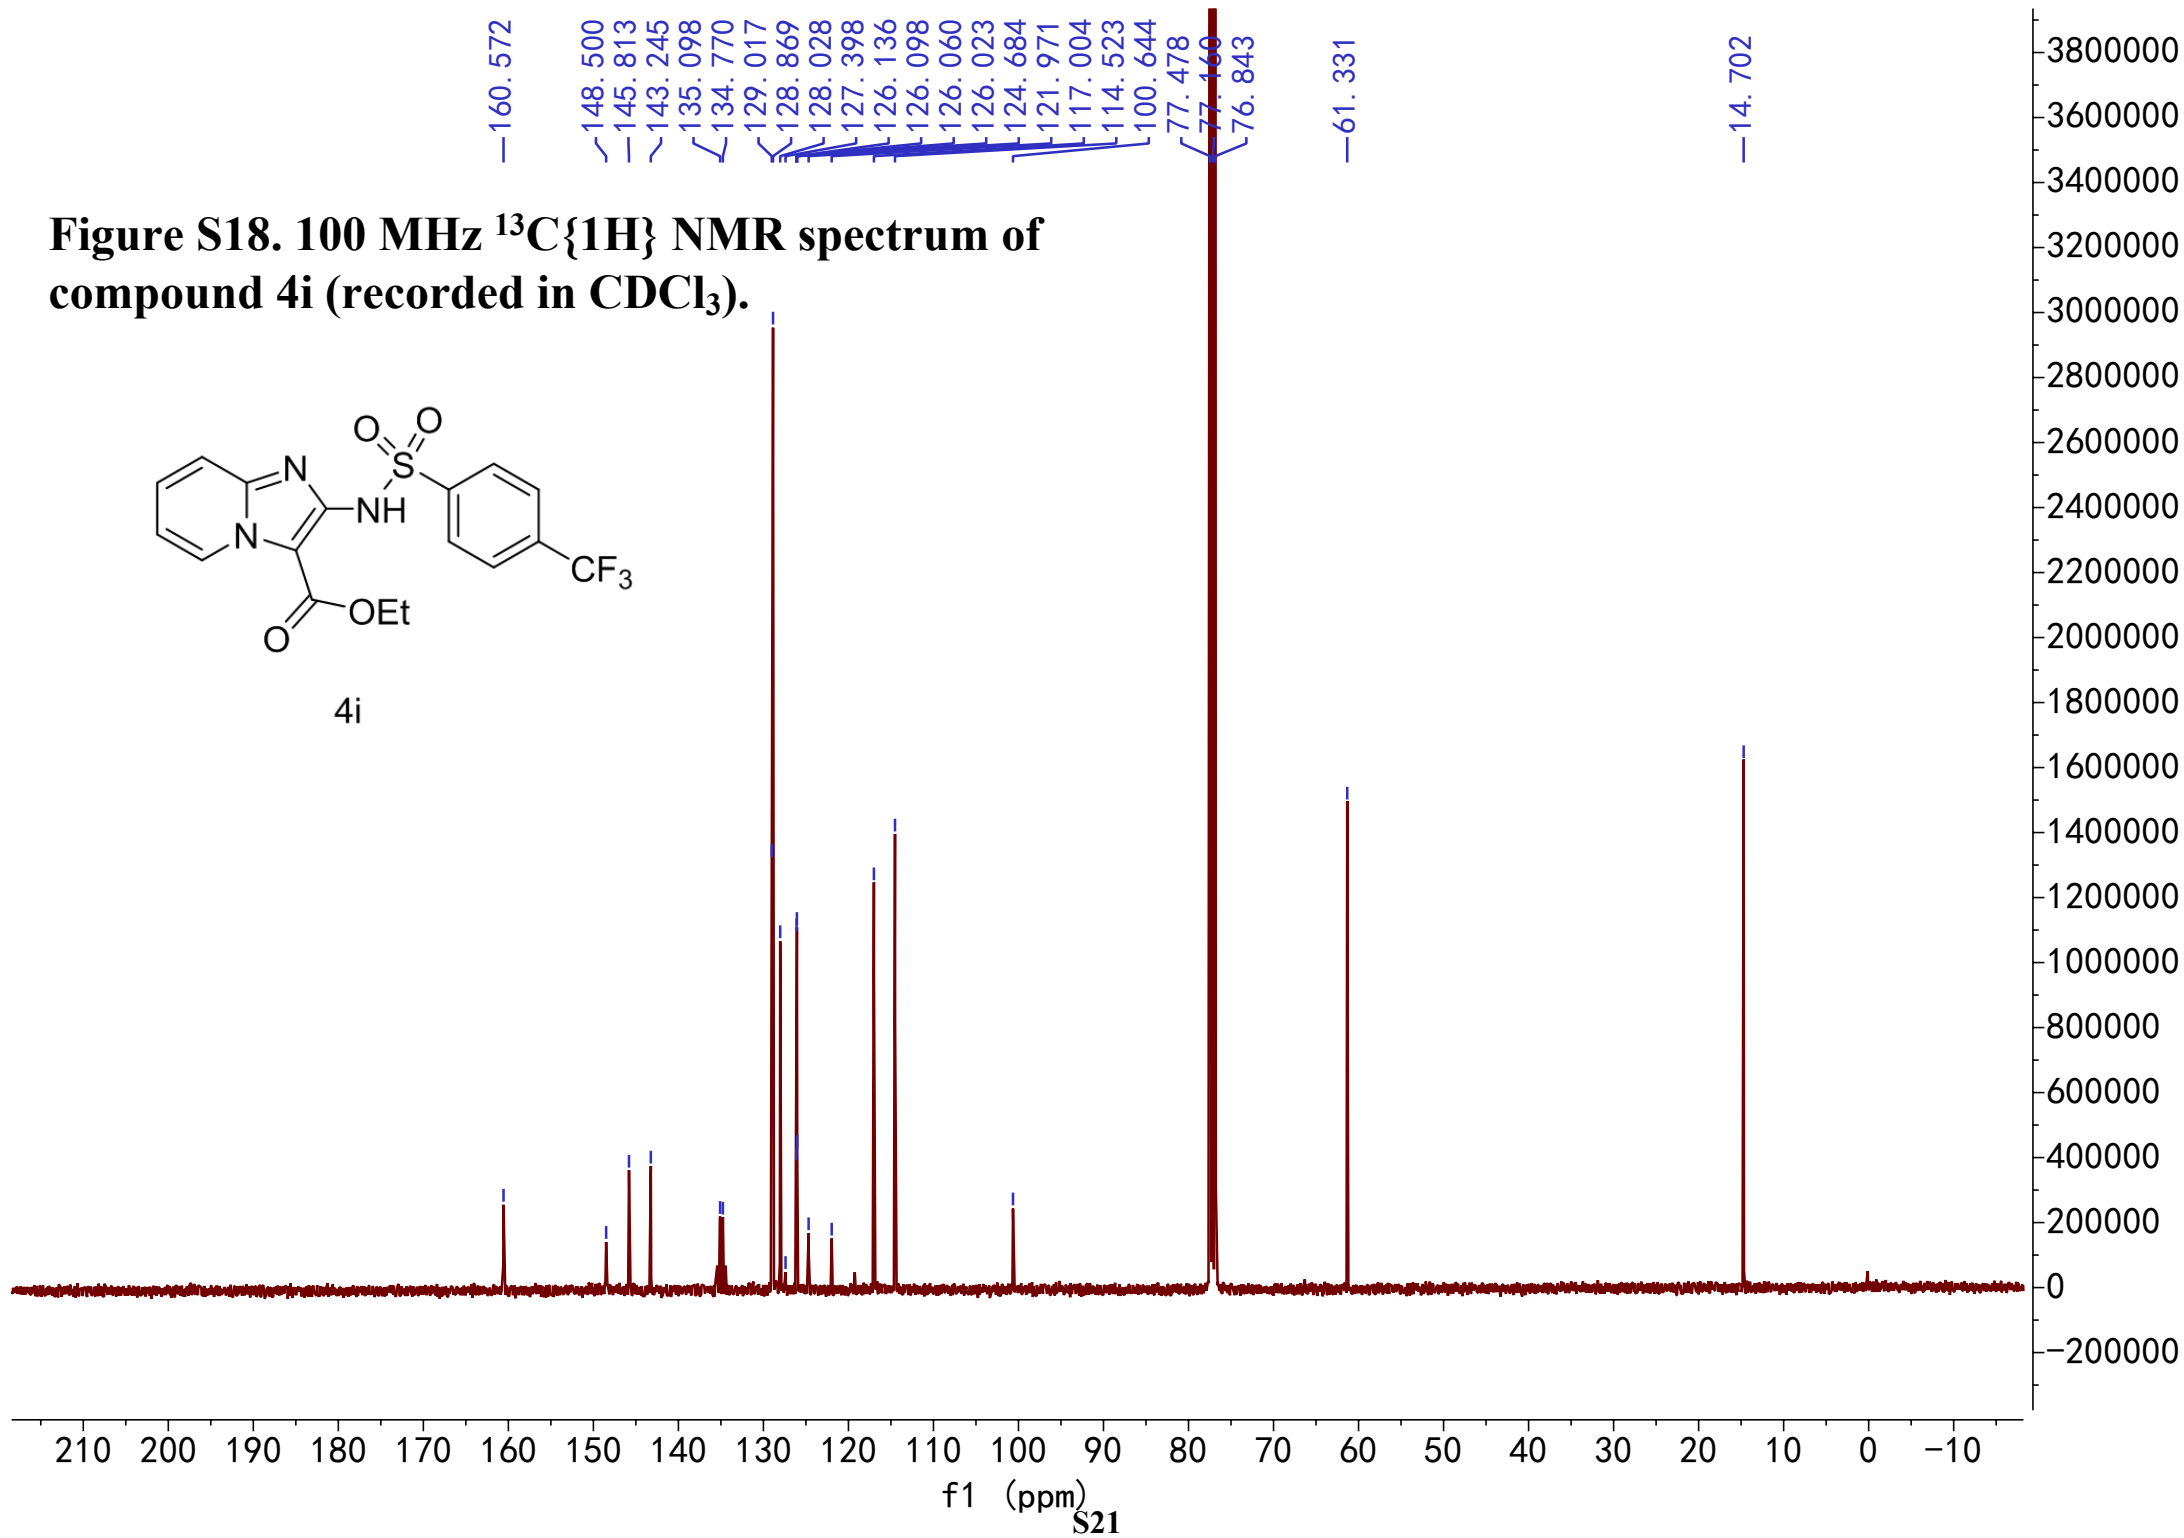

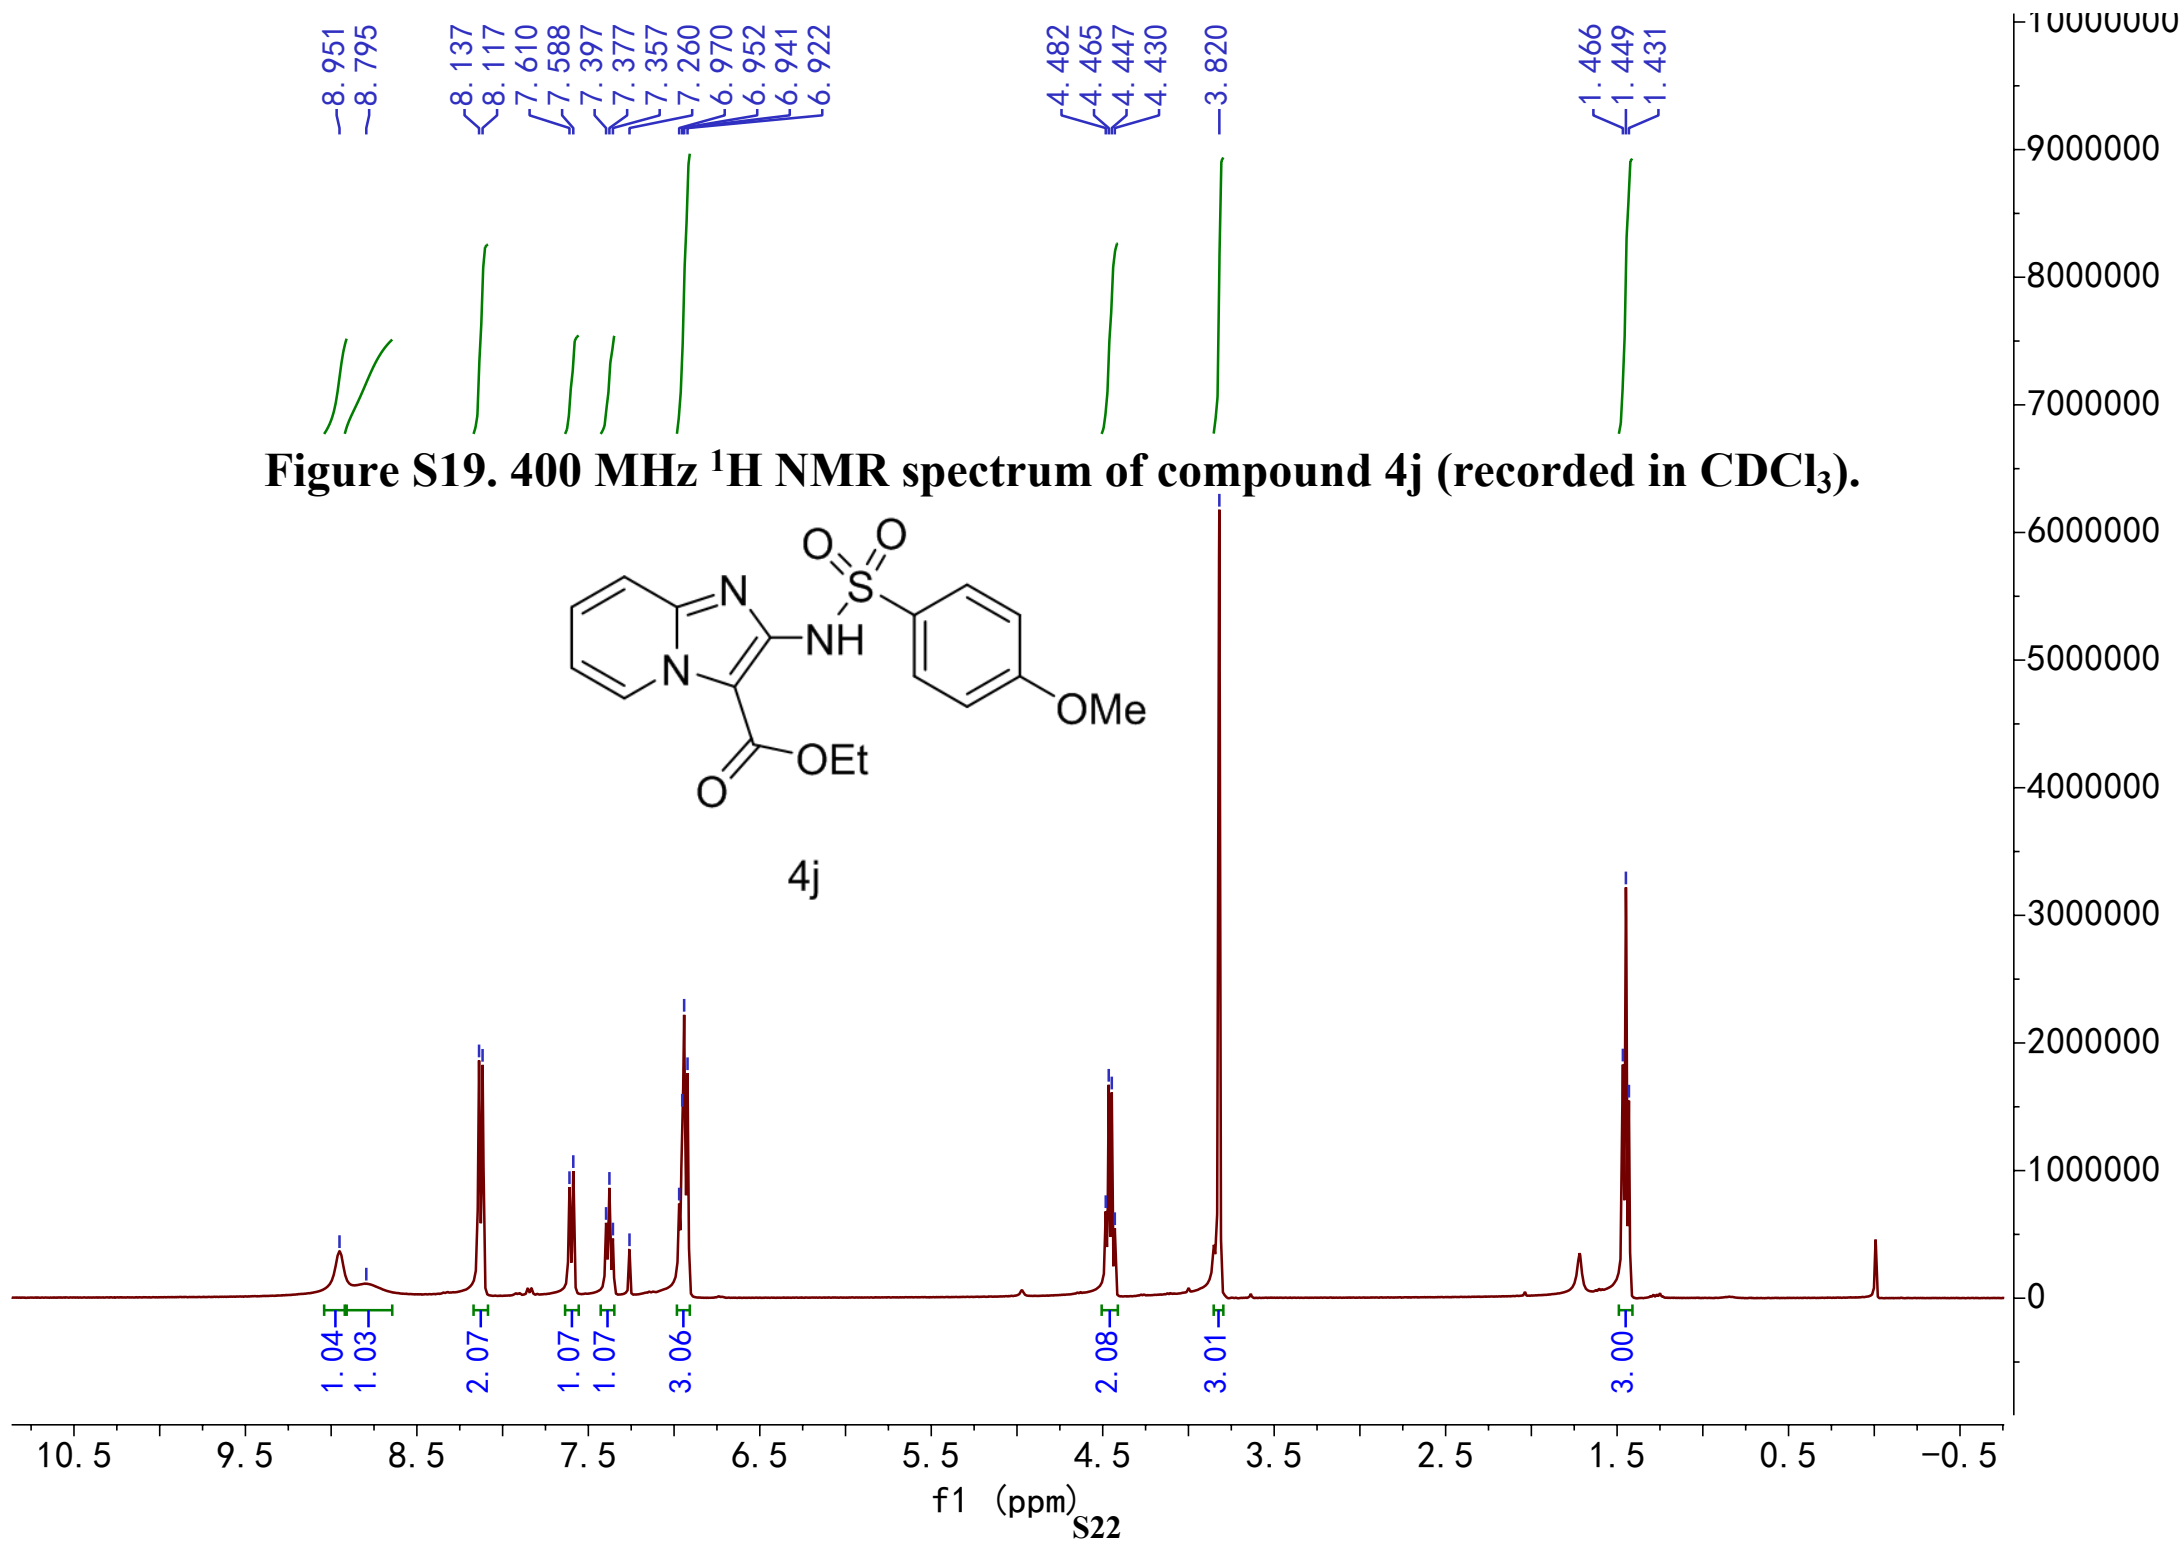

**Figure S20. 100 MHz  $^{13}\text{C}\{^1\text{H}\}$  NMR spectrum of compound 4j (recorded in  $\text{CDCl}_3$ ).**

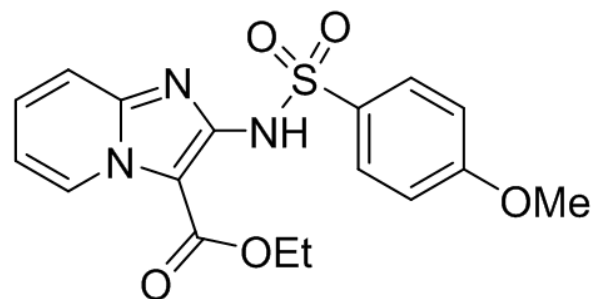

4j

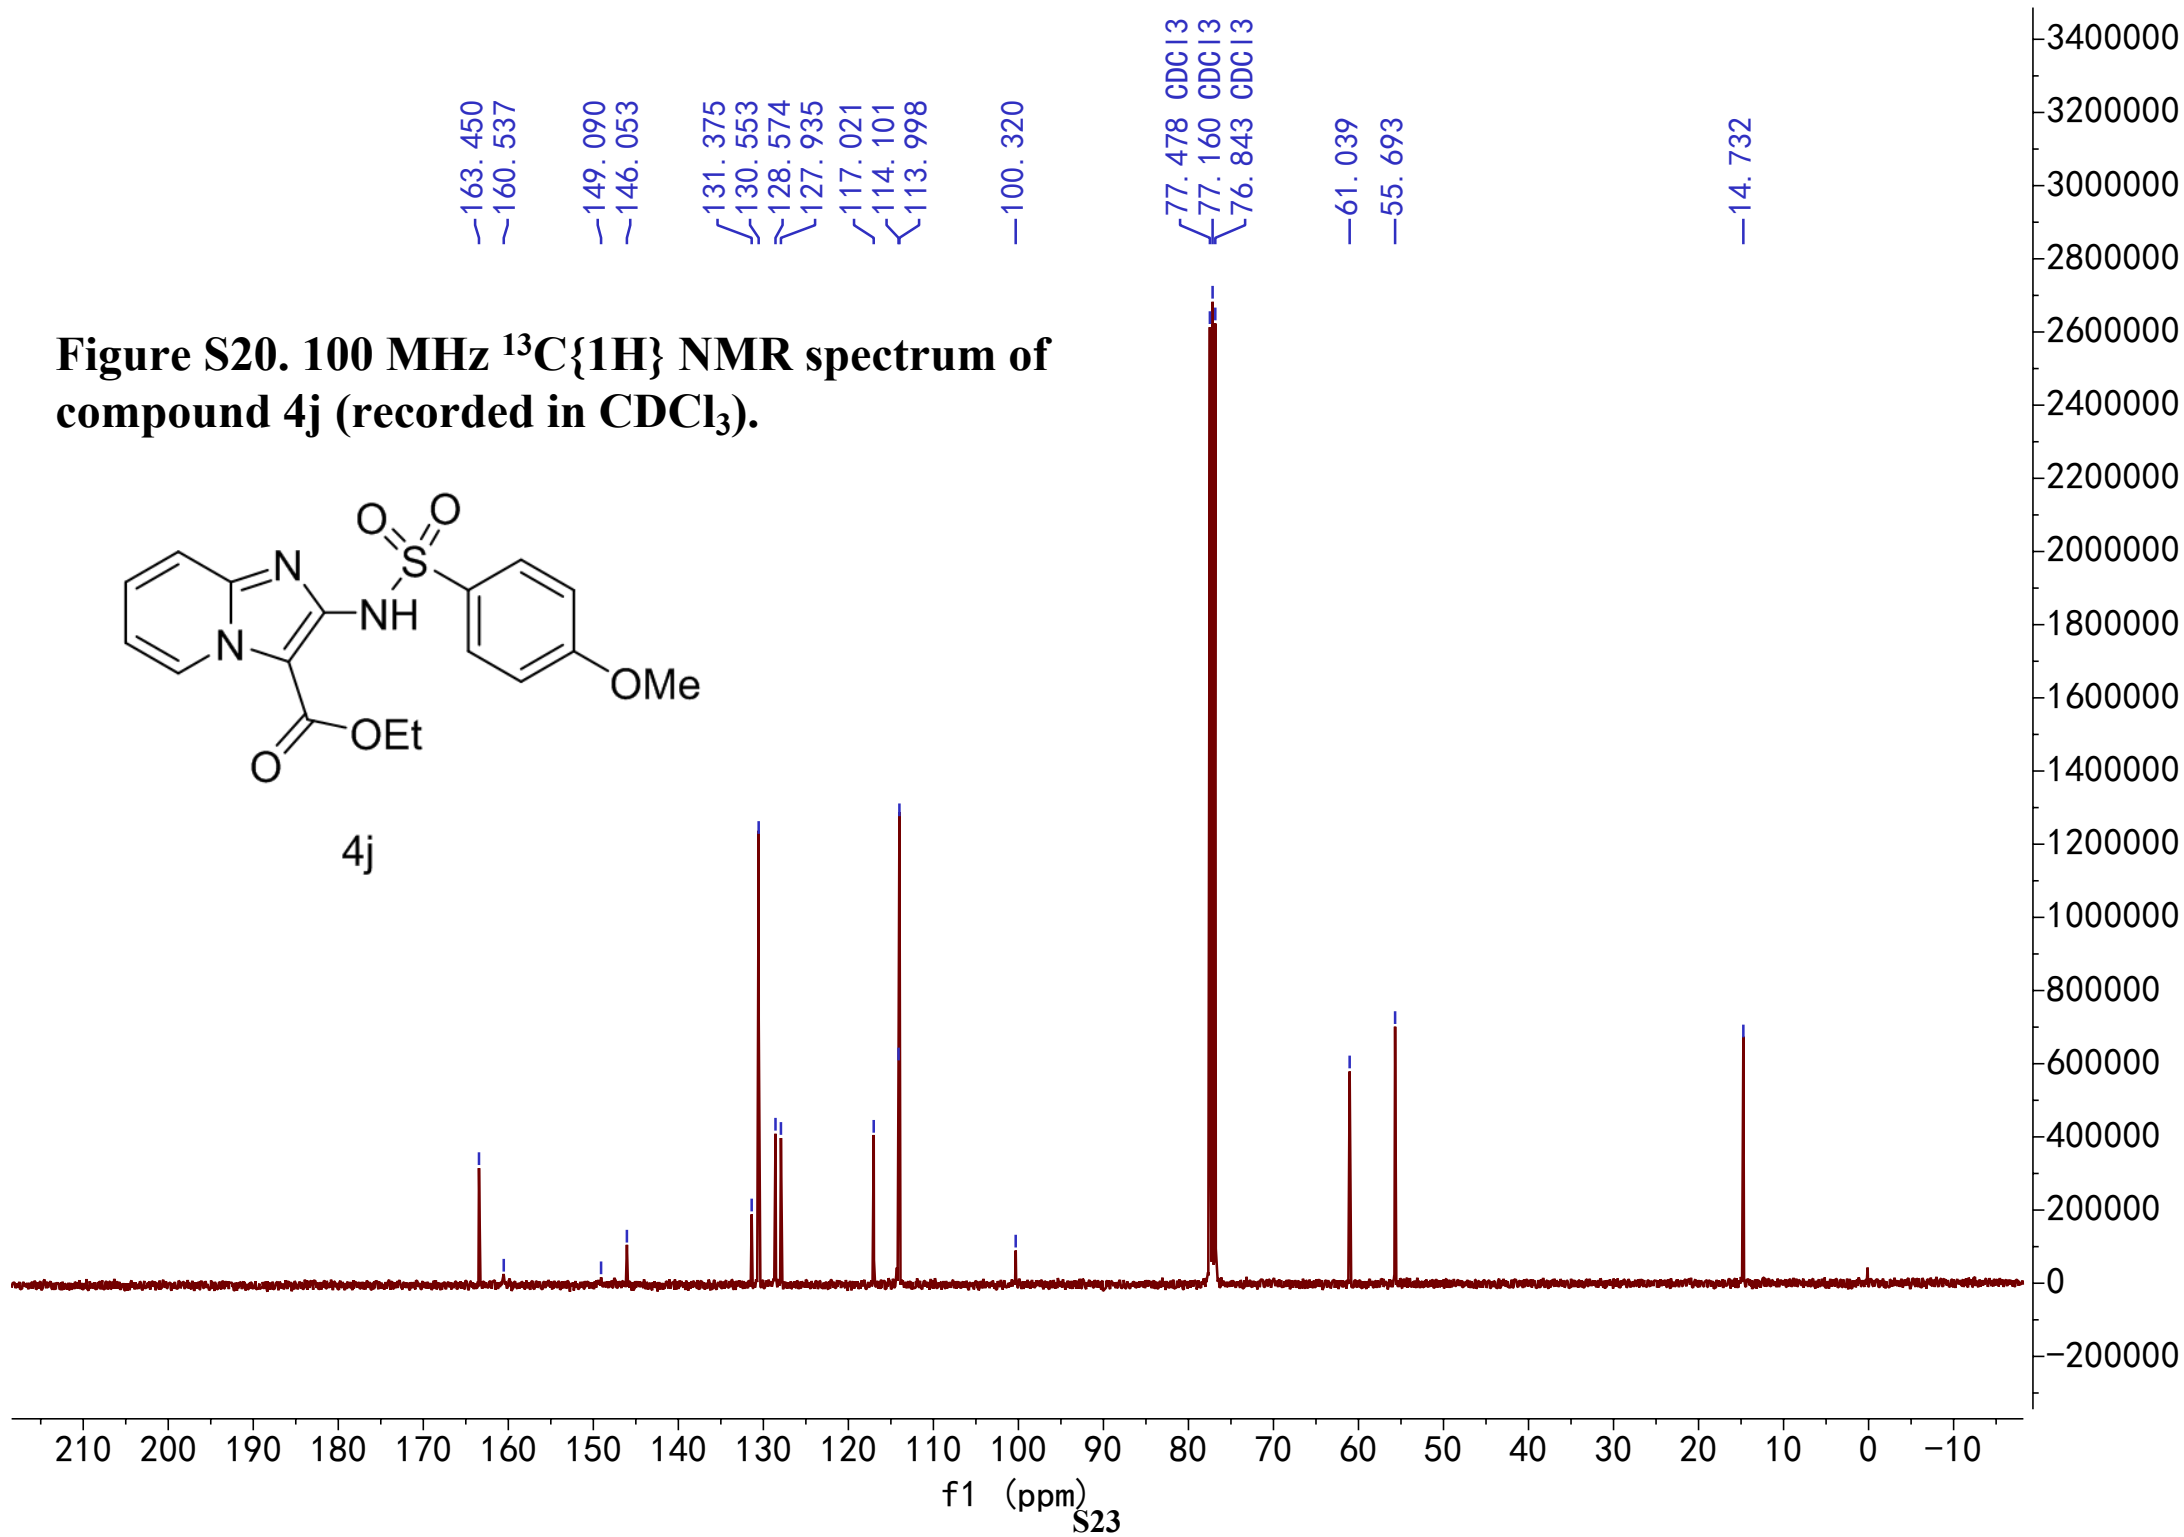

9.059  
8.494  
7.654  
7.632  
7.466  
7.446  
7.426  
7.260  
7.047  
7.029  
7.012

4.508  
4.490  
4.472  
4.455

3.515

1.480  
1.462  
1.445

Figure S21. 400 MHz <sup>1</sup>H NMR spectrum of compound 4k (recorded in CDCl<sub>3</sub>).

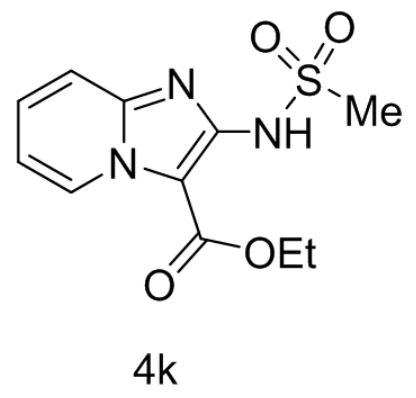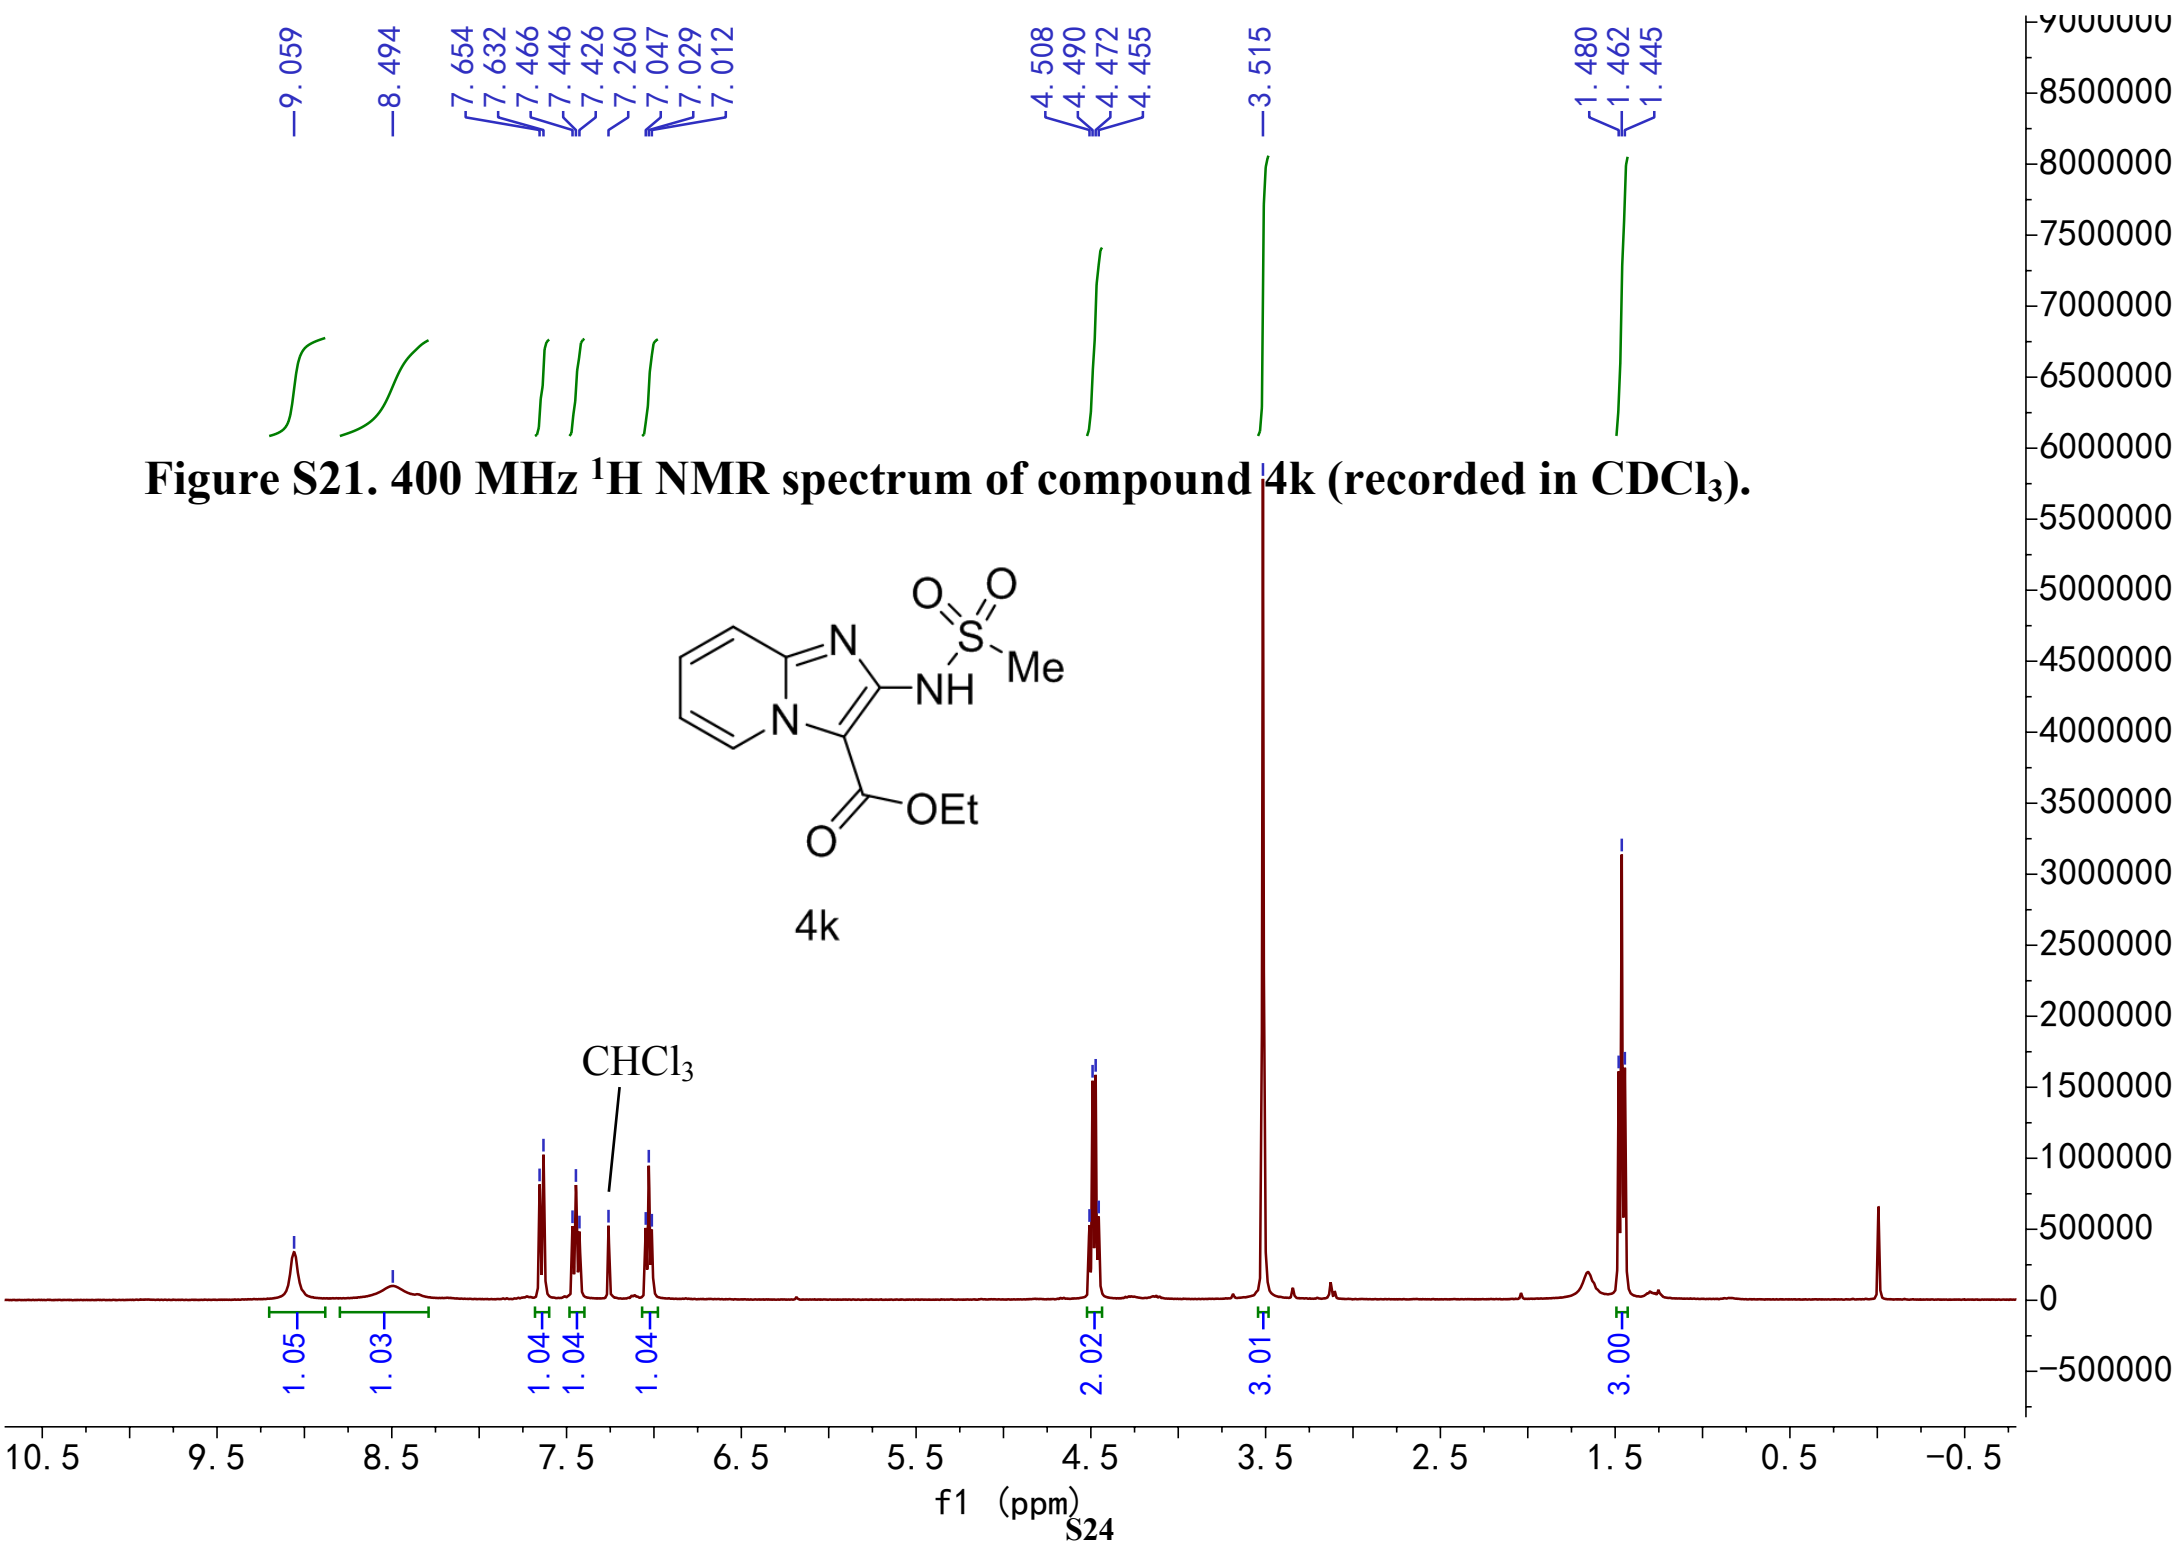



**Figure S22. 100 MHz  $^{13}\text{C}\{^1\text{H}\}$  NMR spectrum of compound 4k (recorded in  $\text{CDCl}_3$ ).**

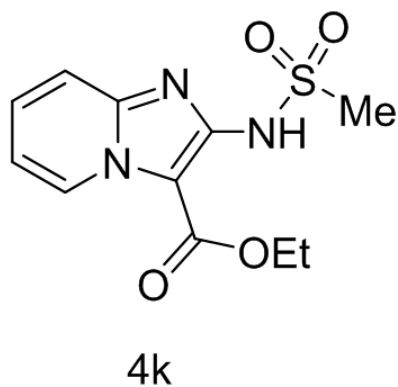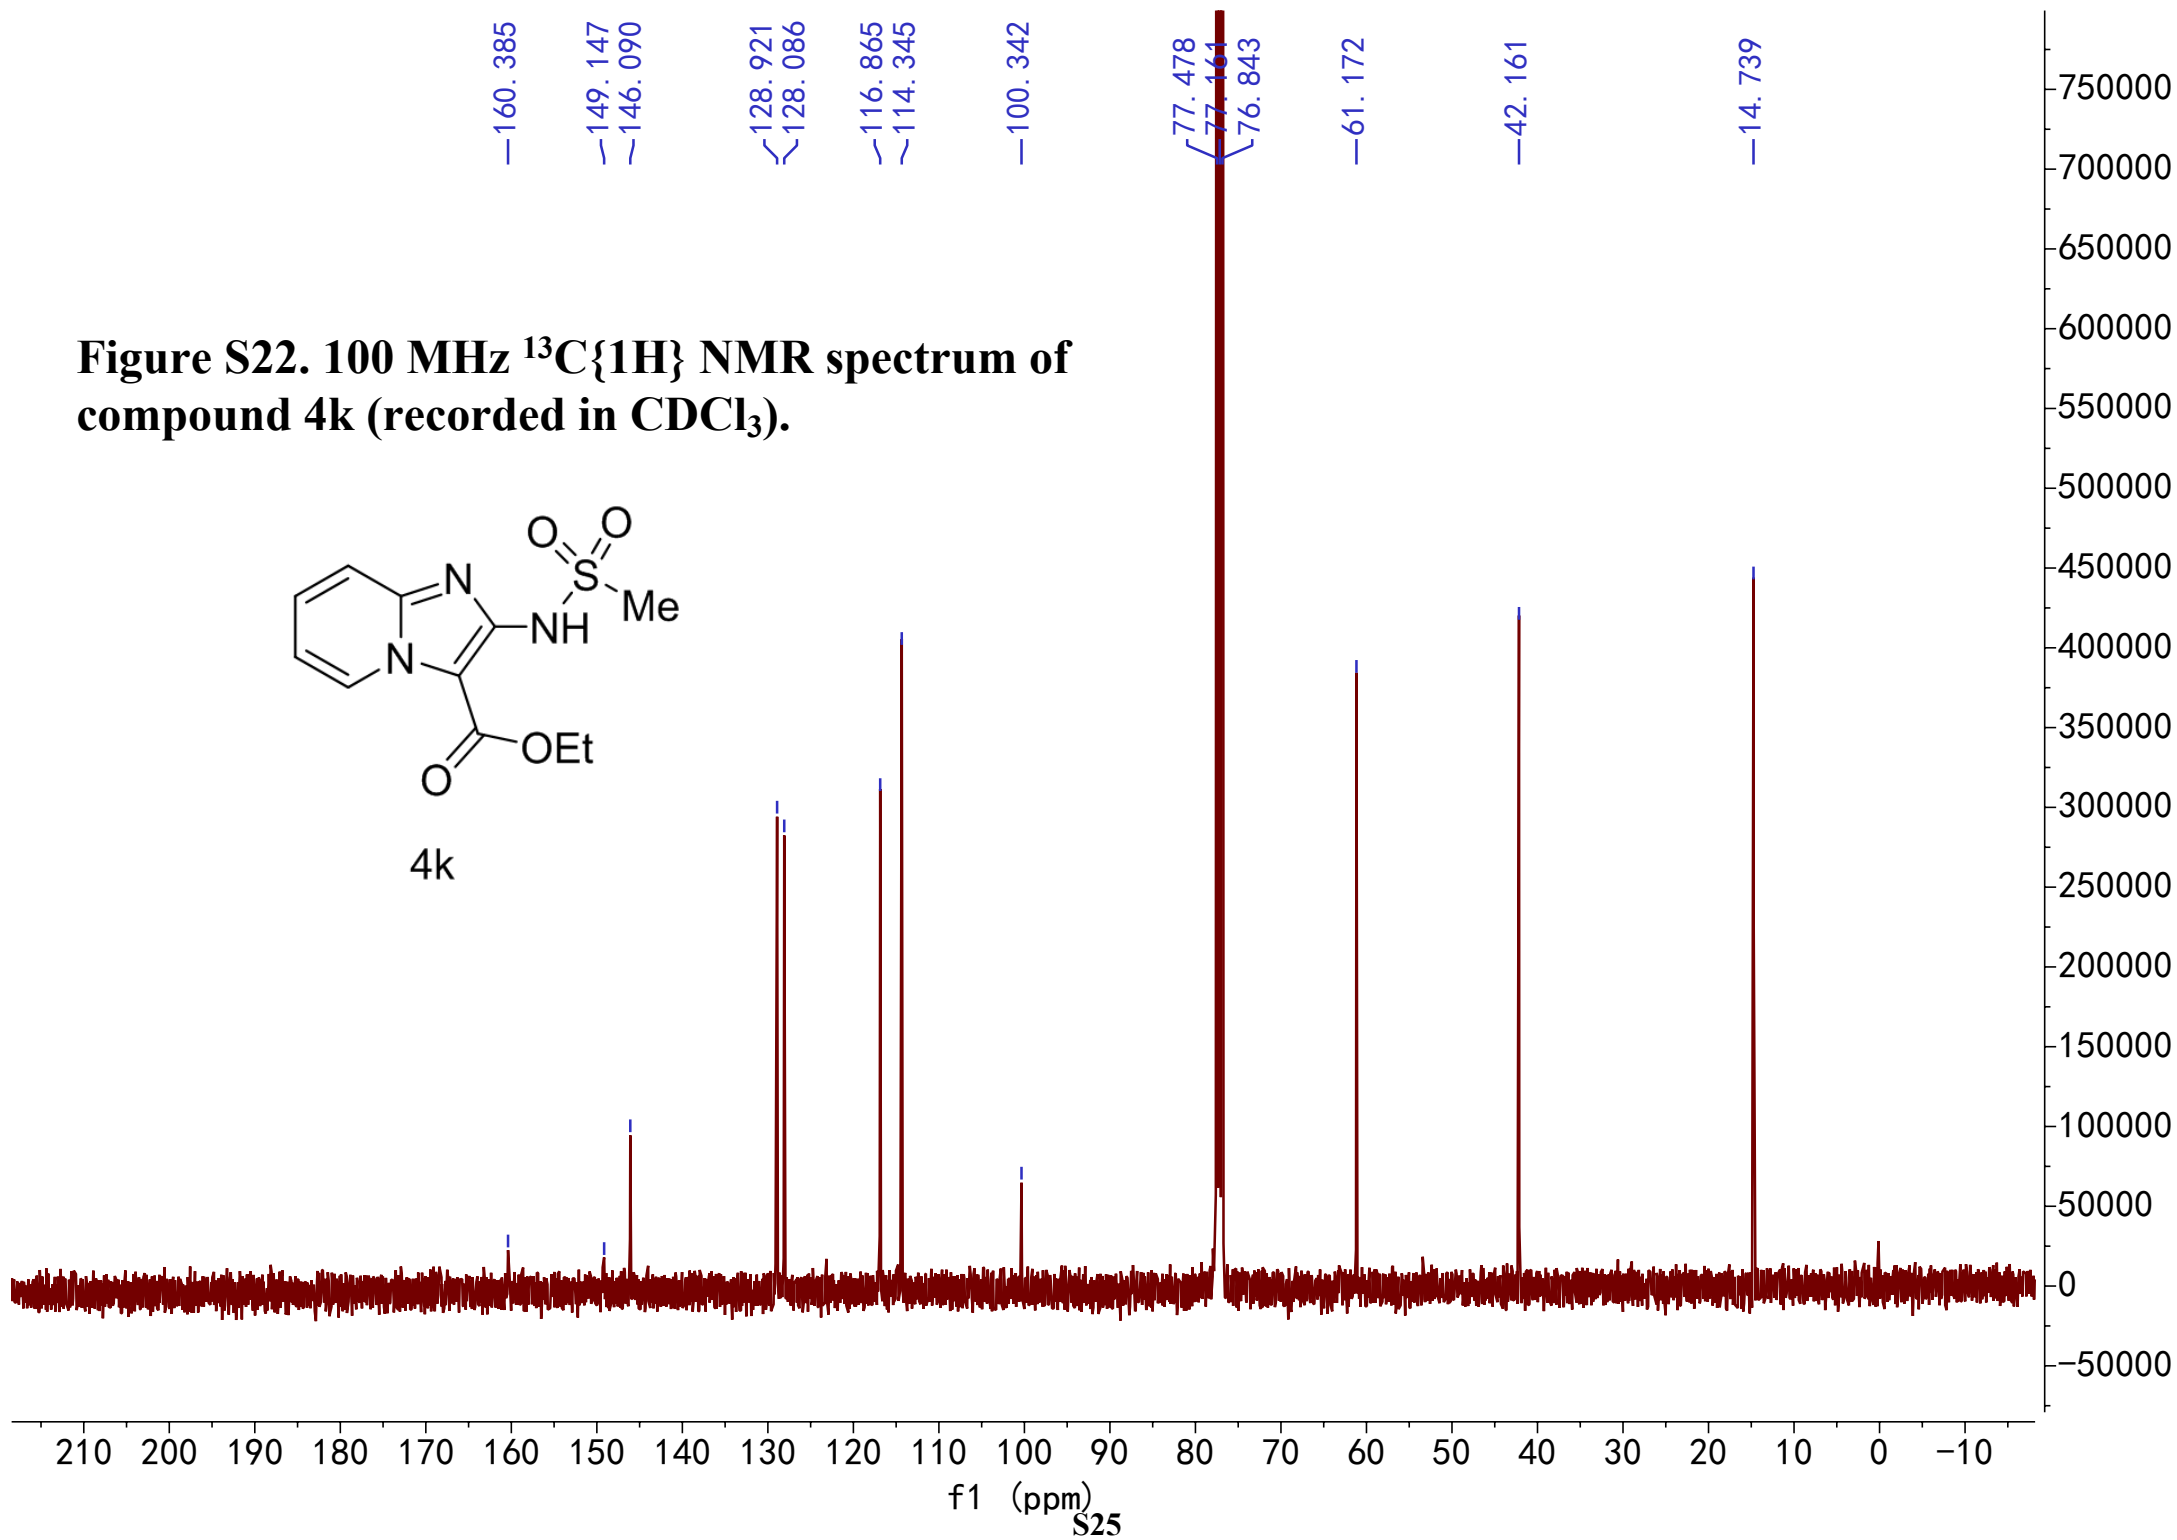

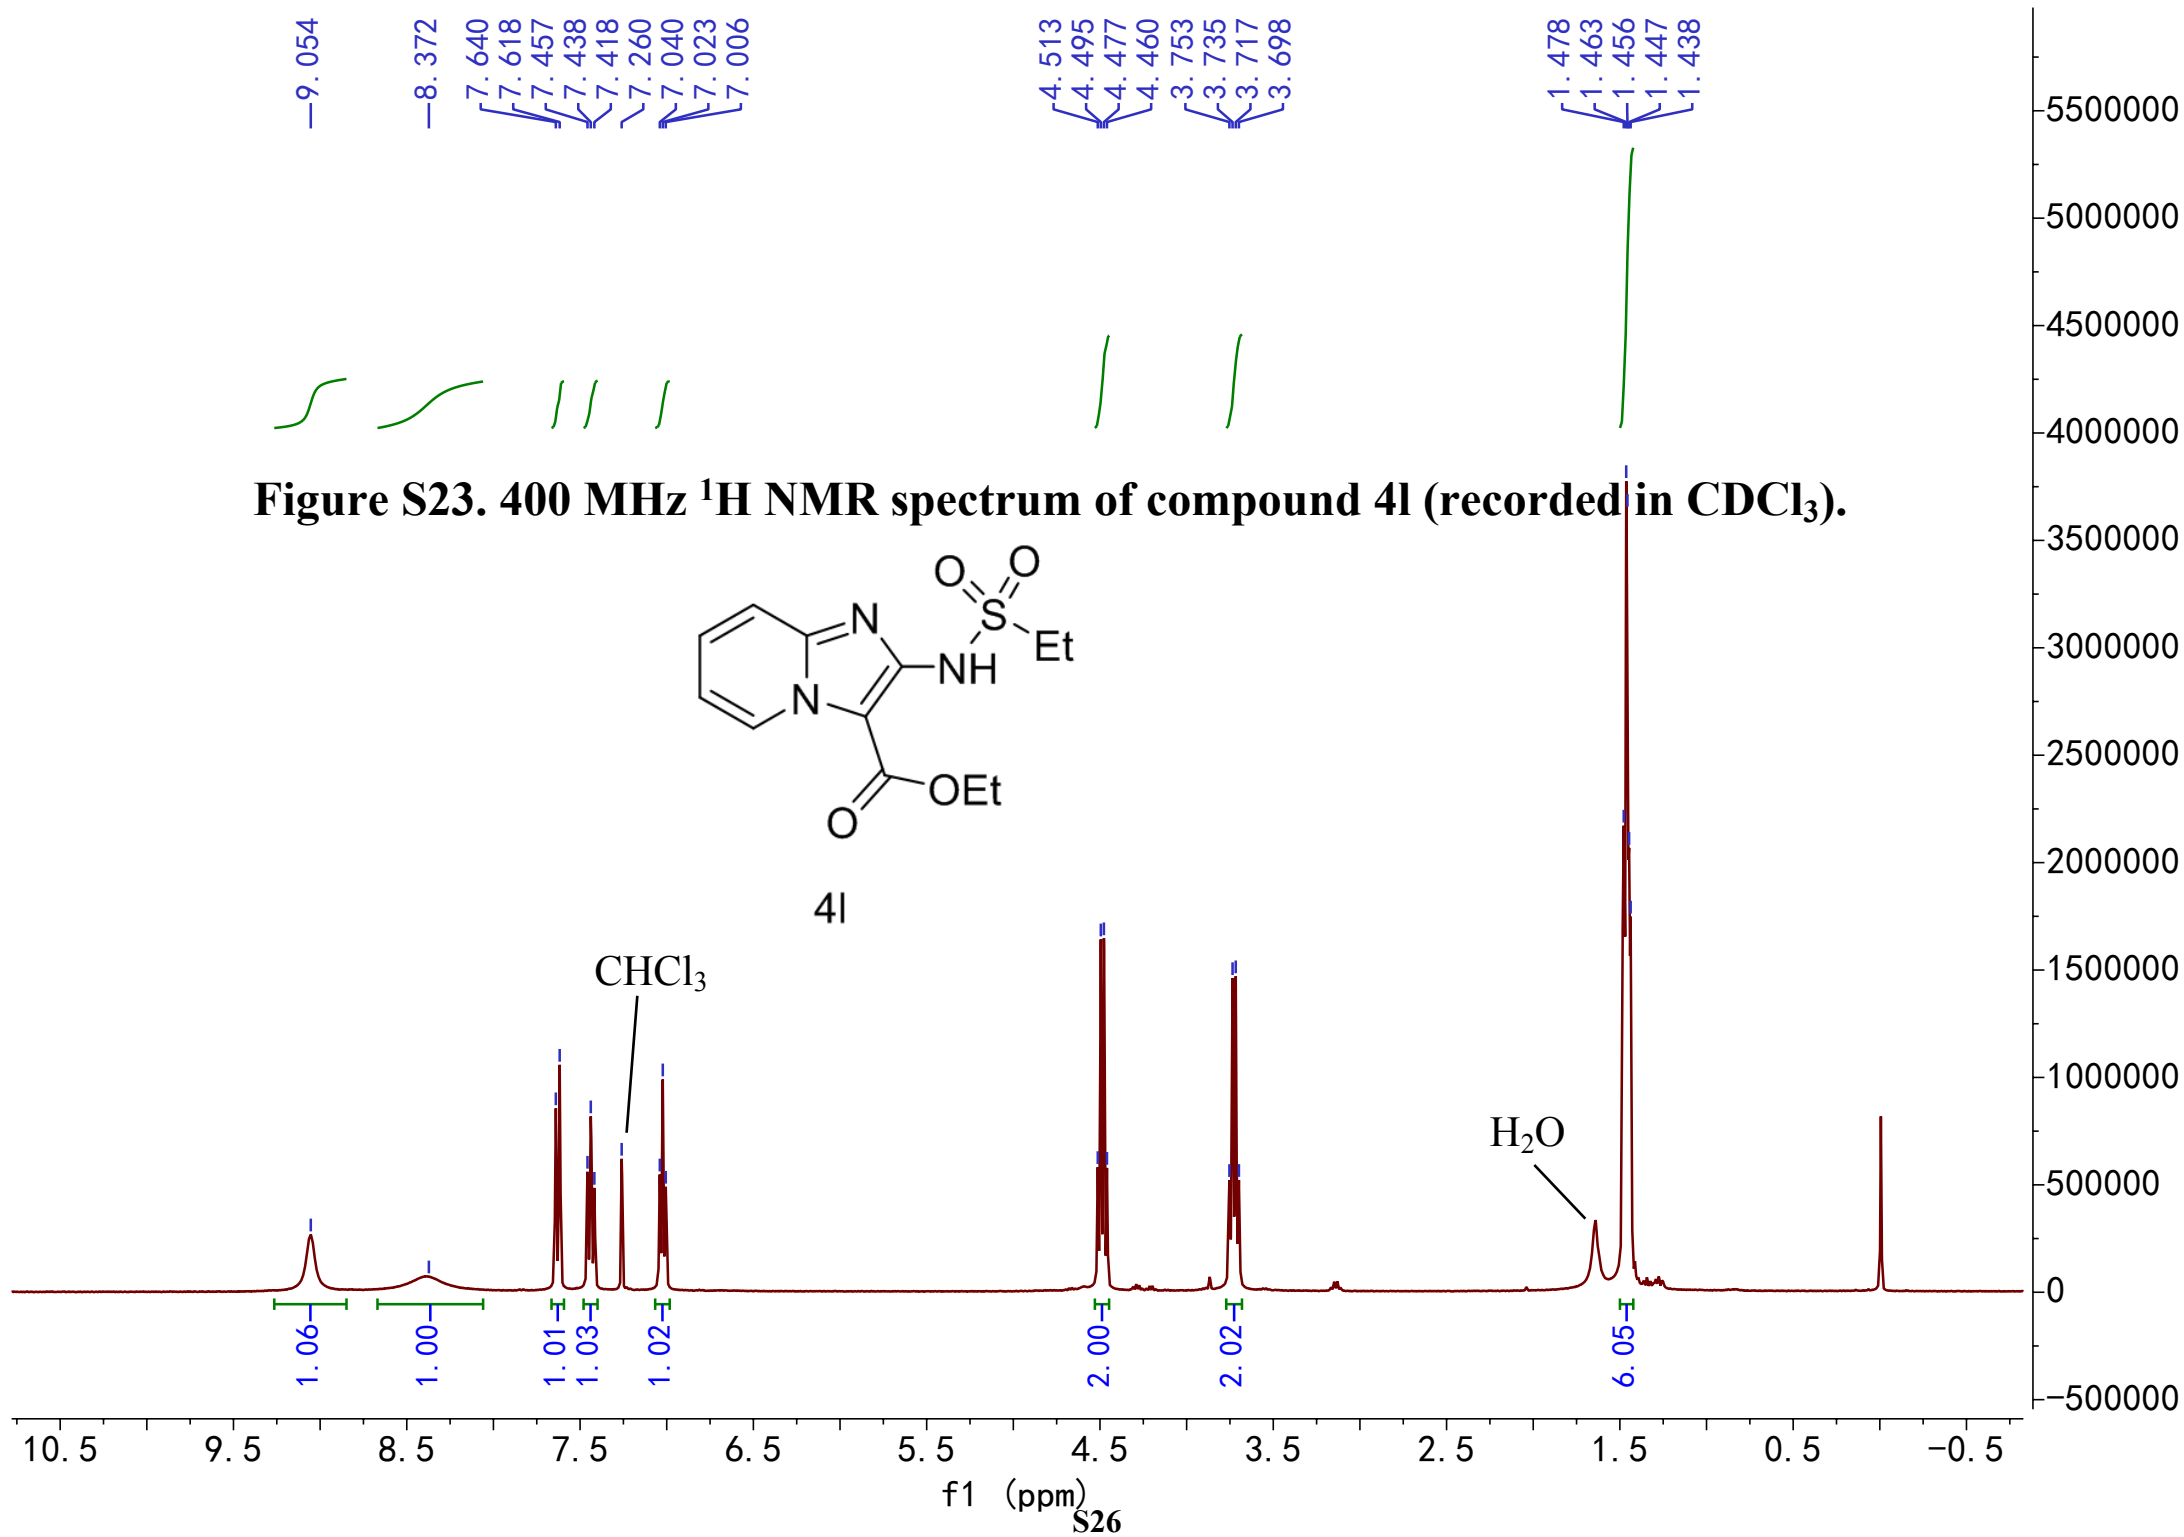

**Figure S24. 100 MHz  $^{13}\text{C}\{^1\text{H}\}$  NMR spectrum of compound 4l (recorded in  $\text{CDCl}_3$ ).**

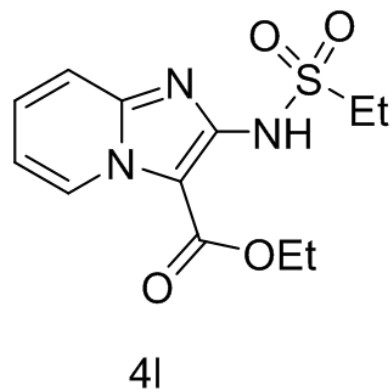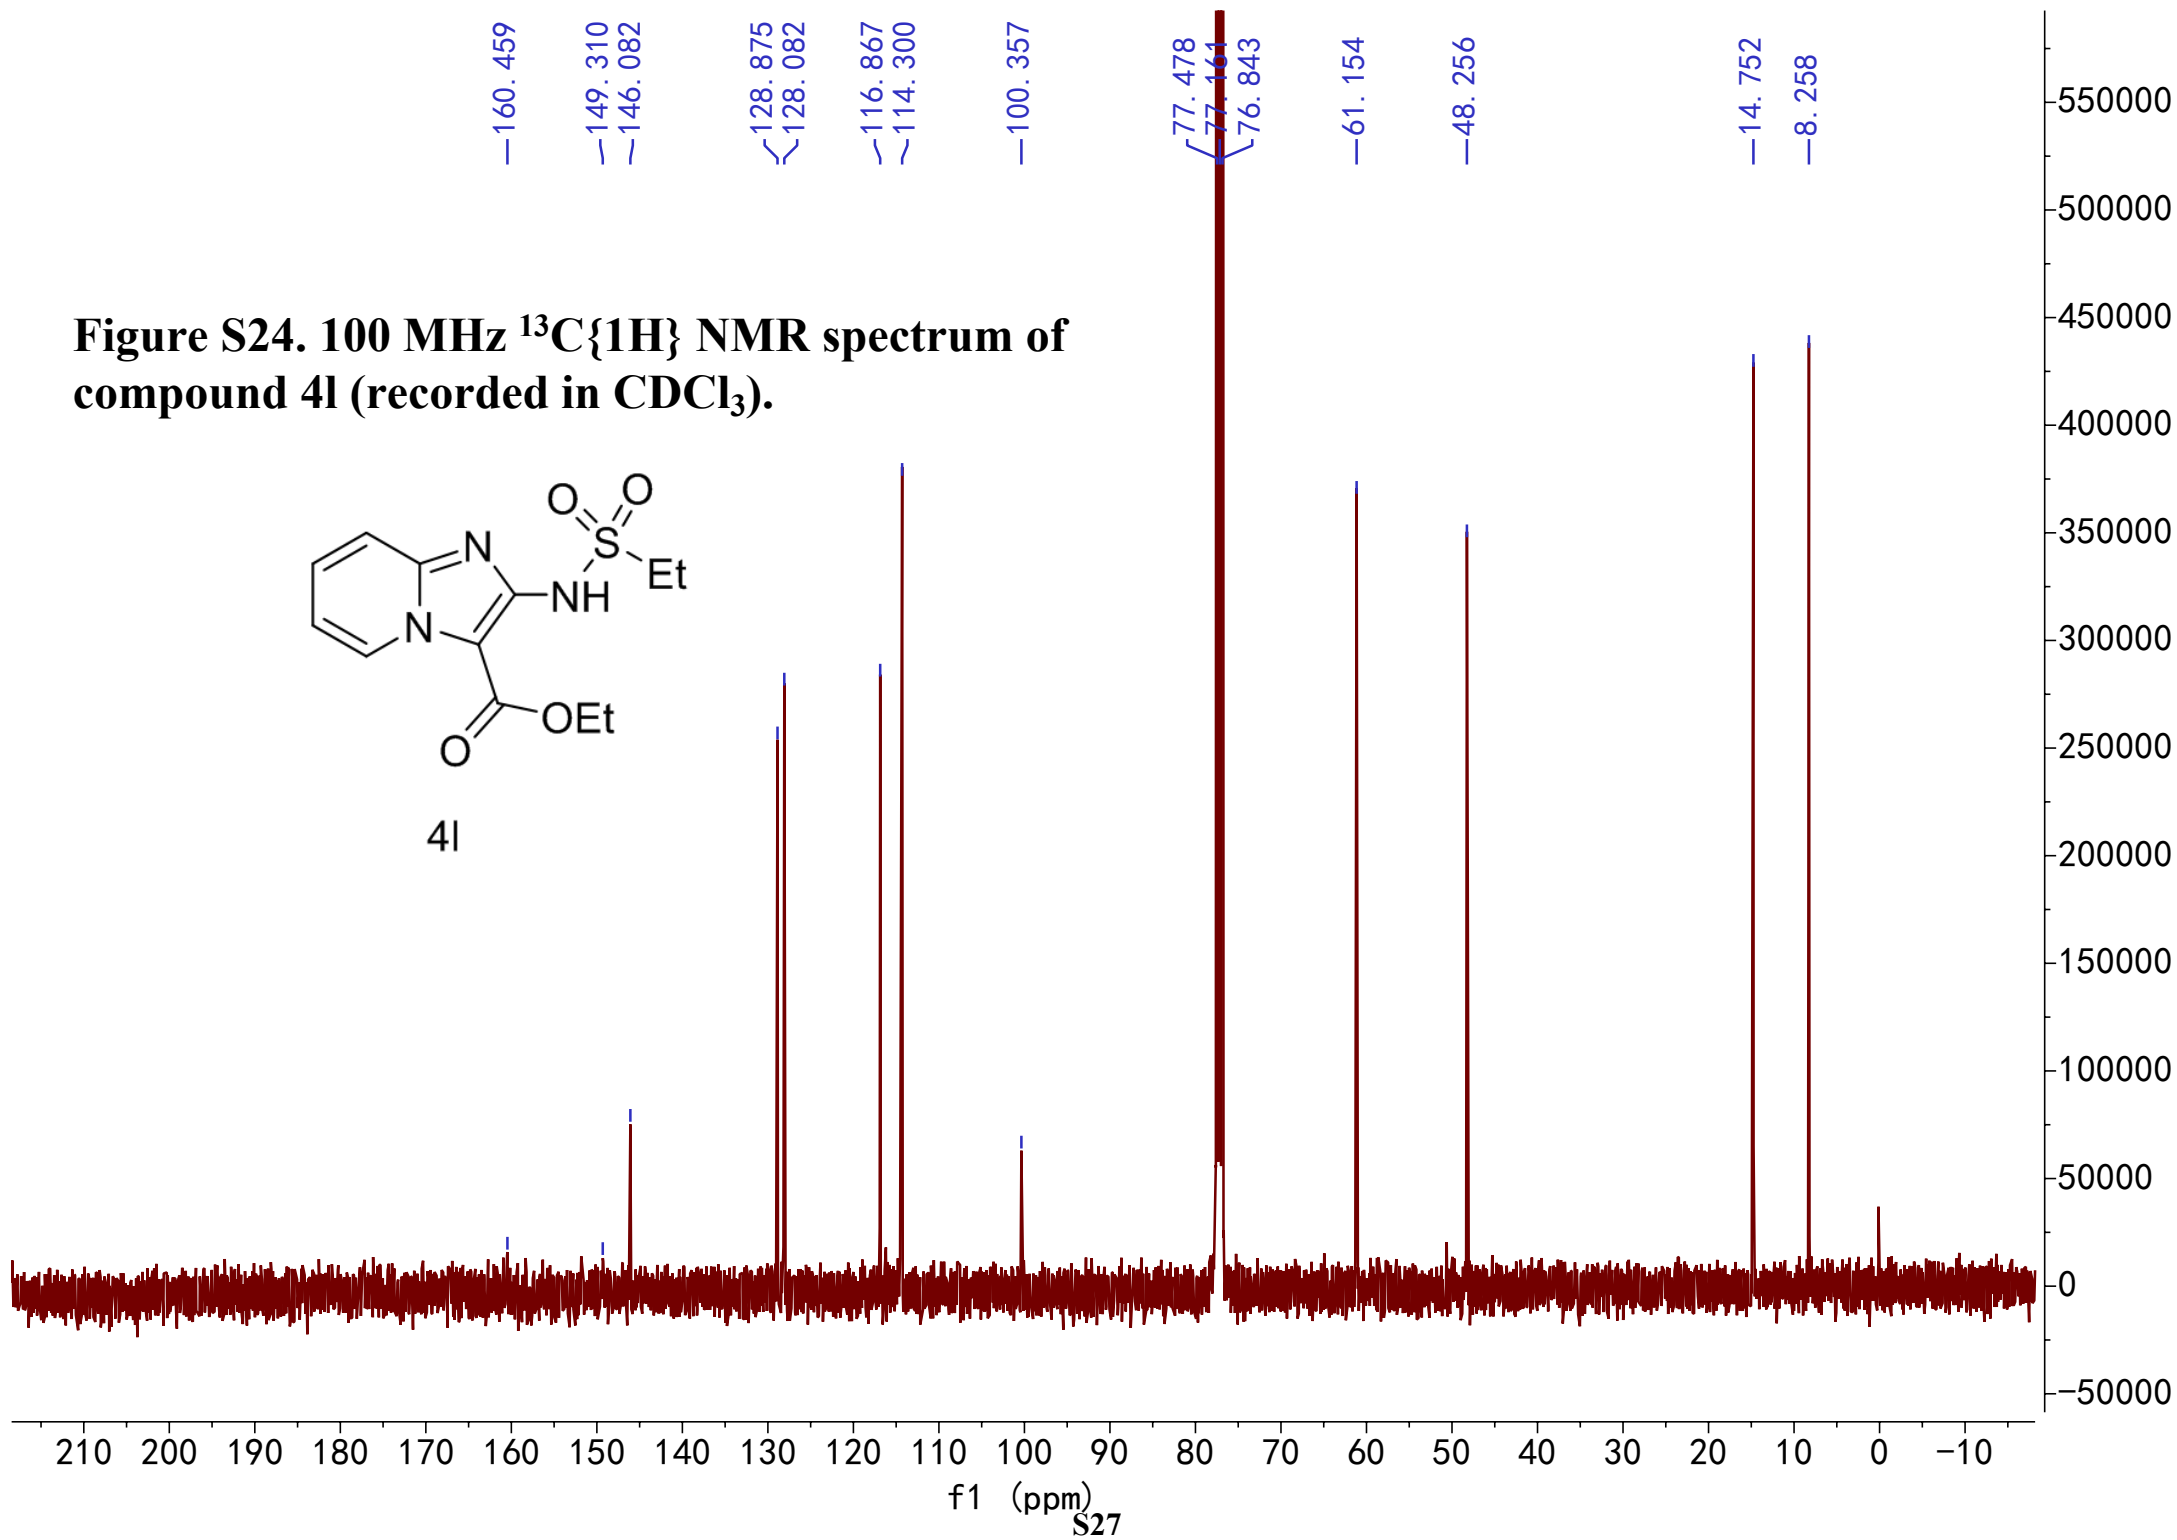

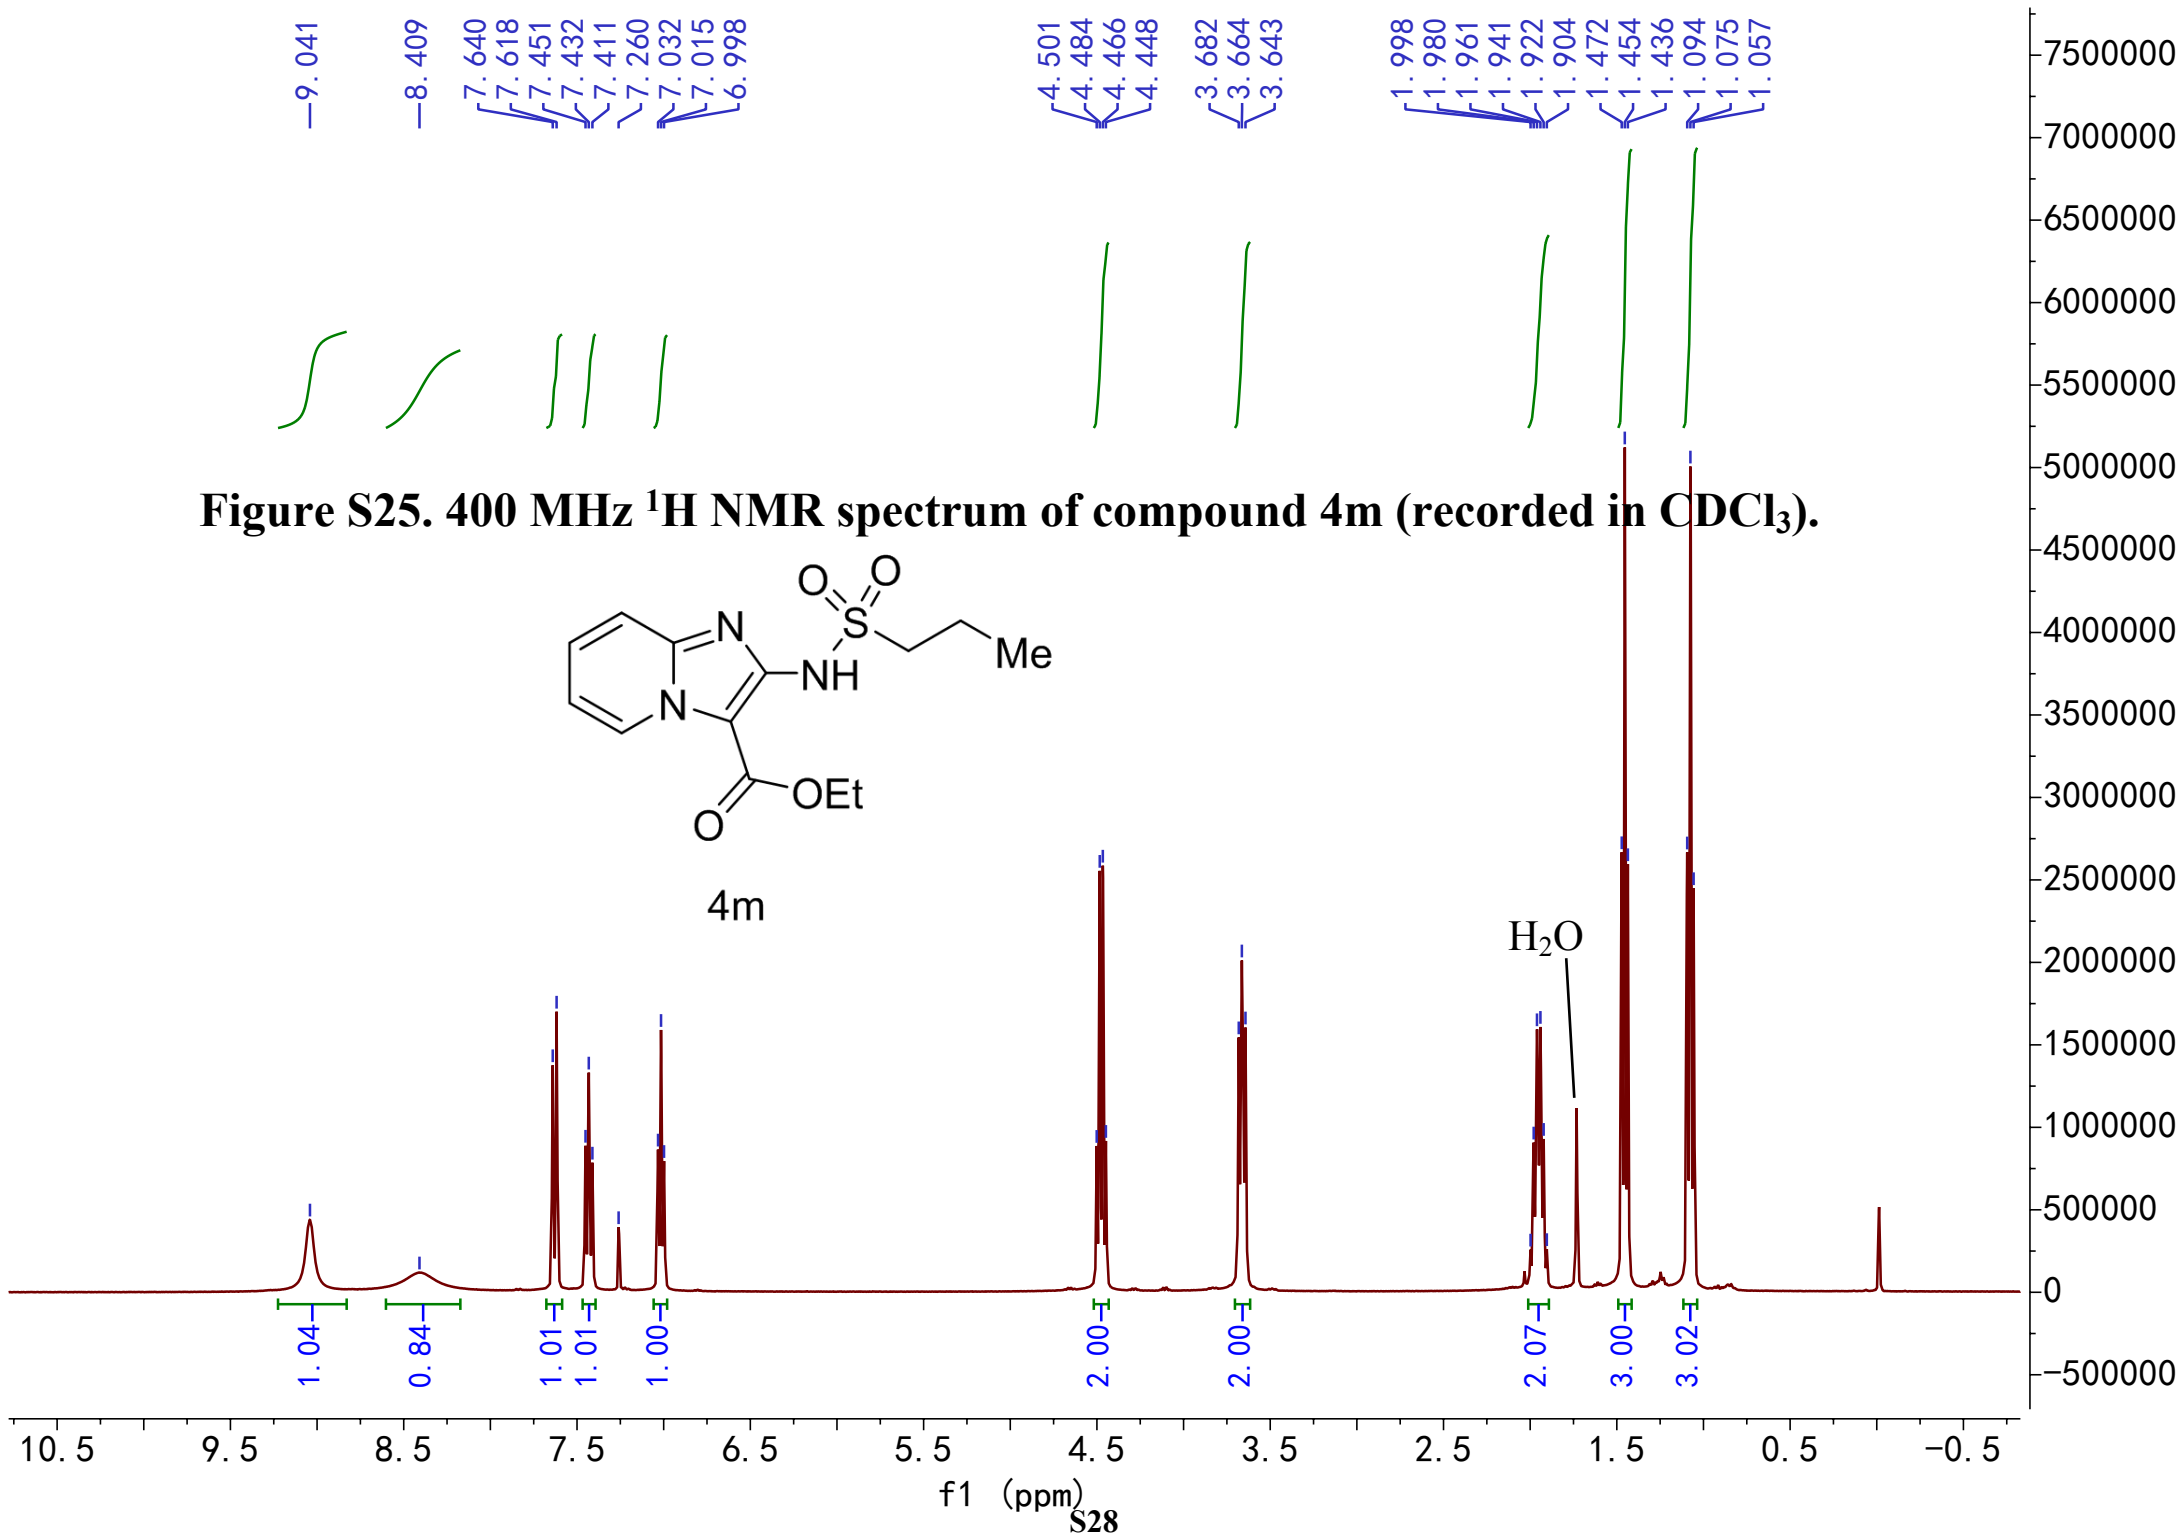

**Figure S26. 100 MHz  $^{13}\text{C}\{^1\text{H}\}$  NMR spectrum of compound 4m (recorded in  $\text{CDCl}_3$ ).**

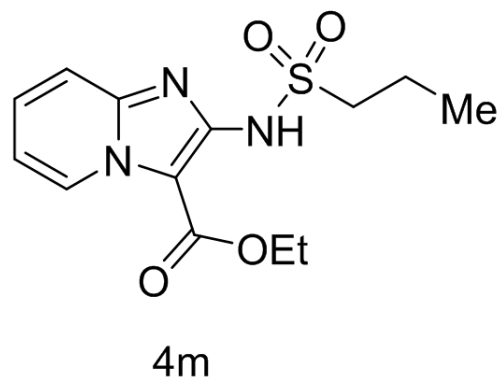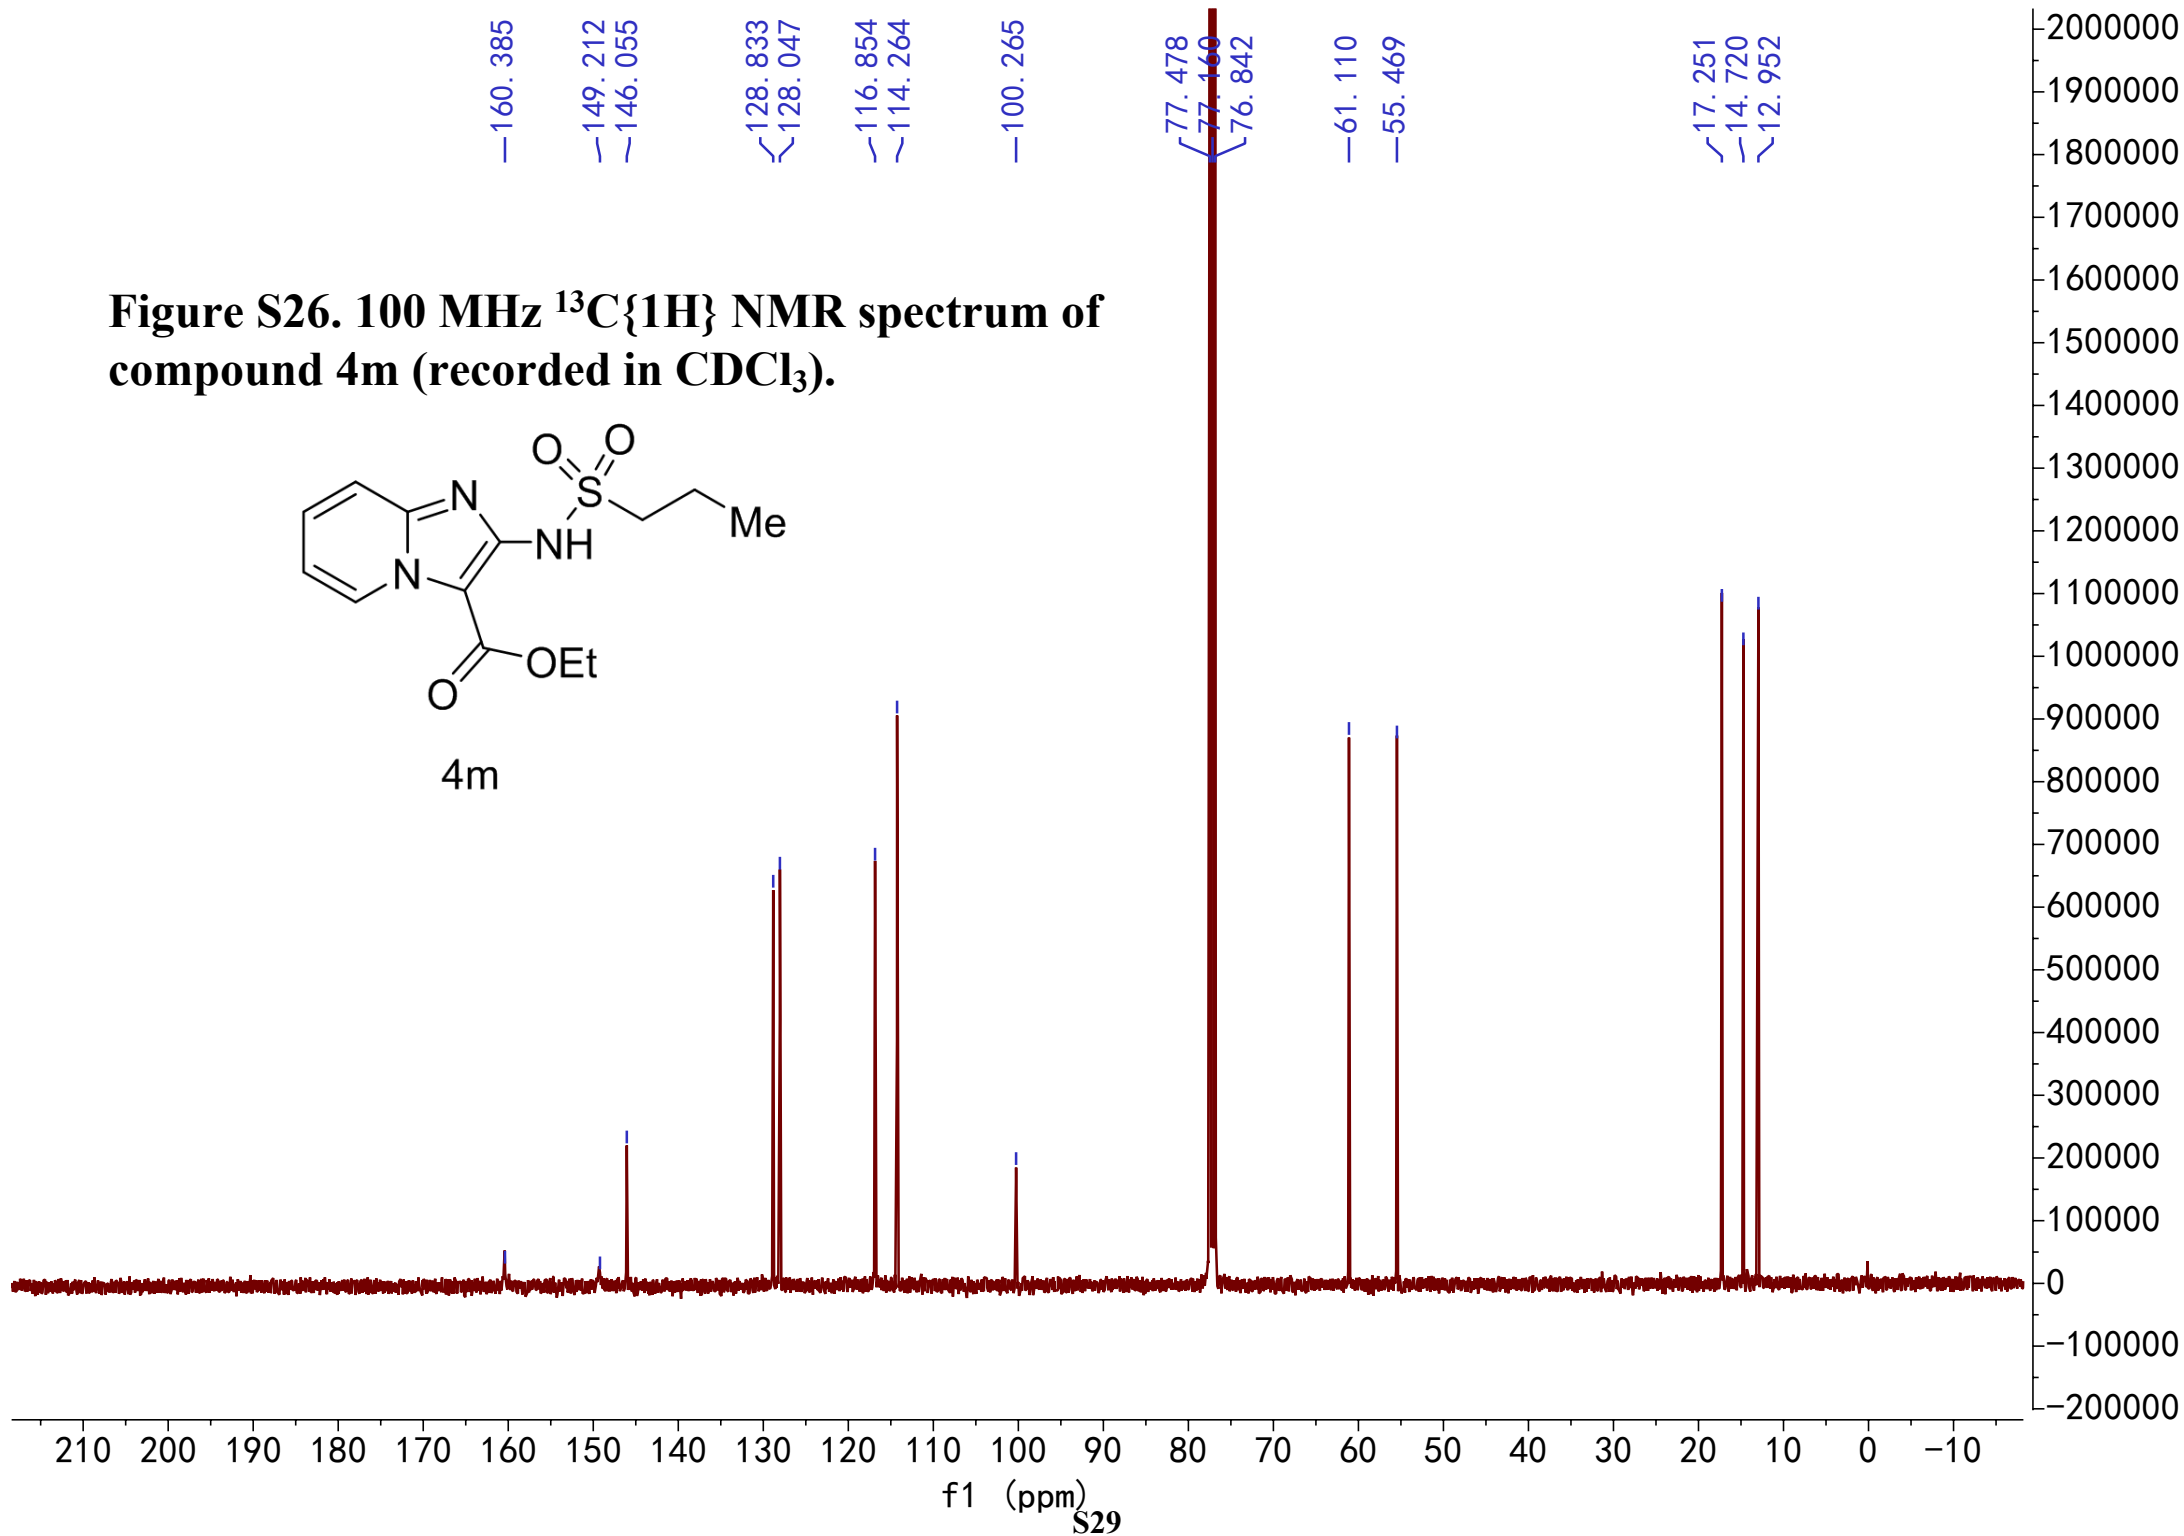

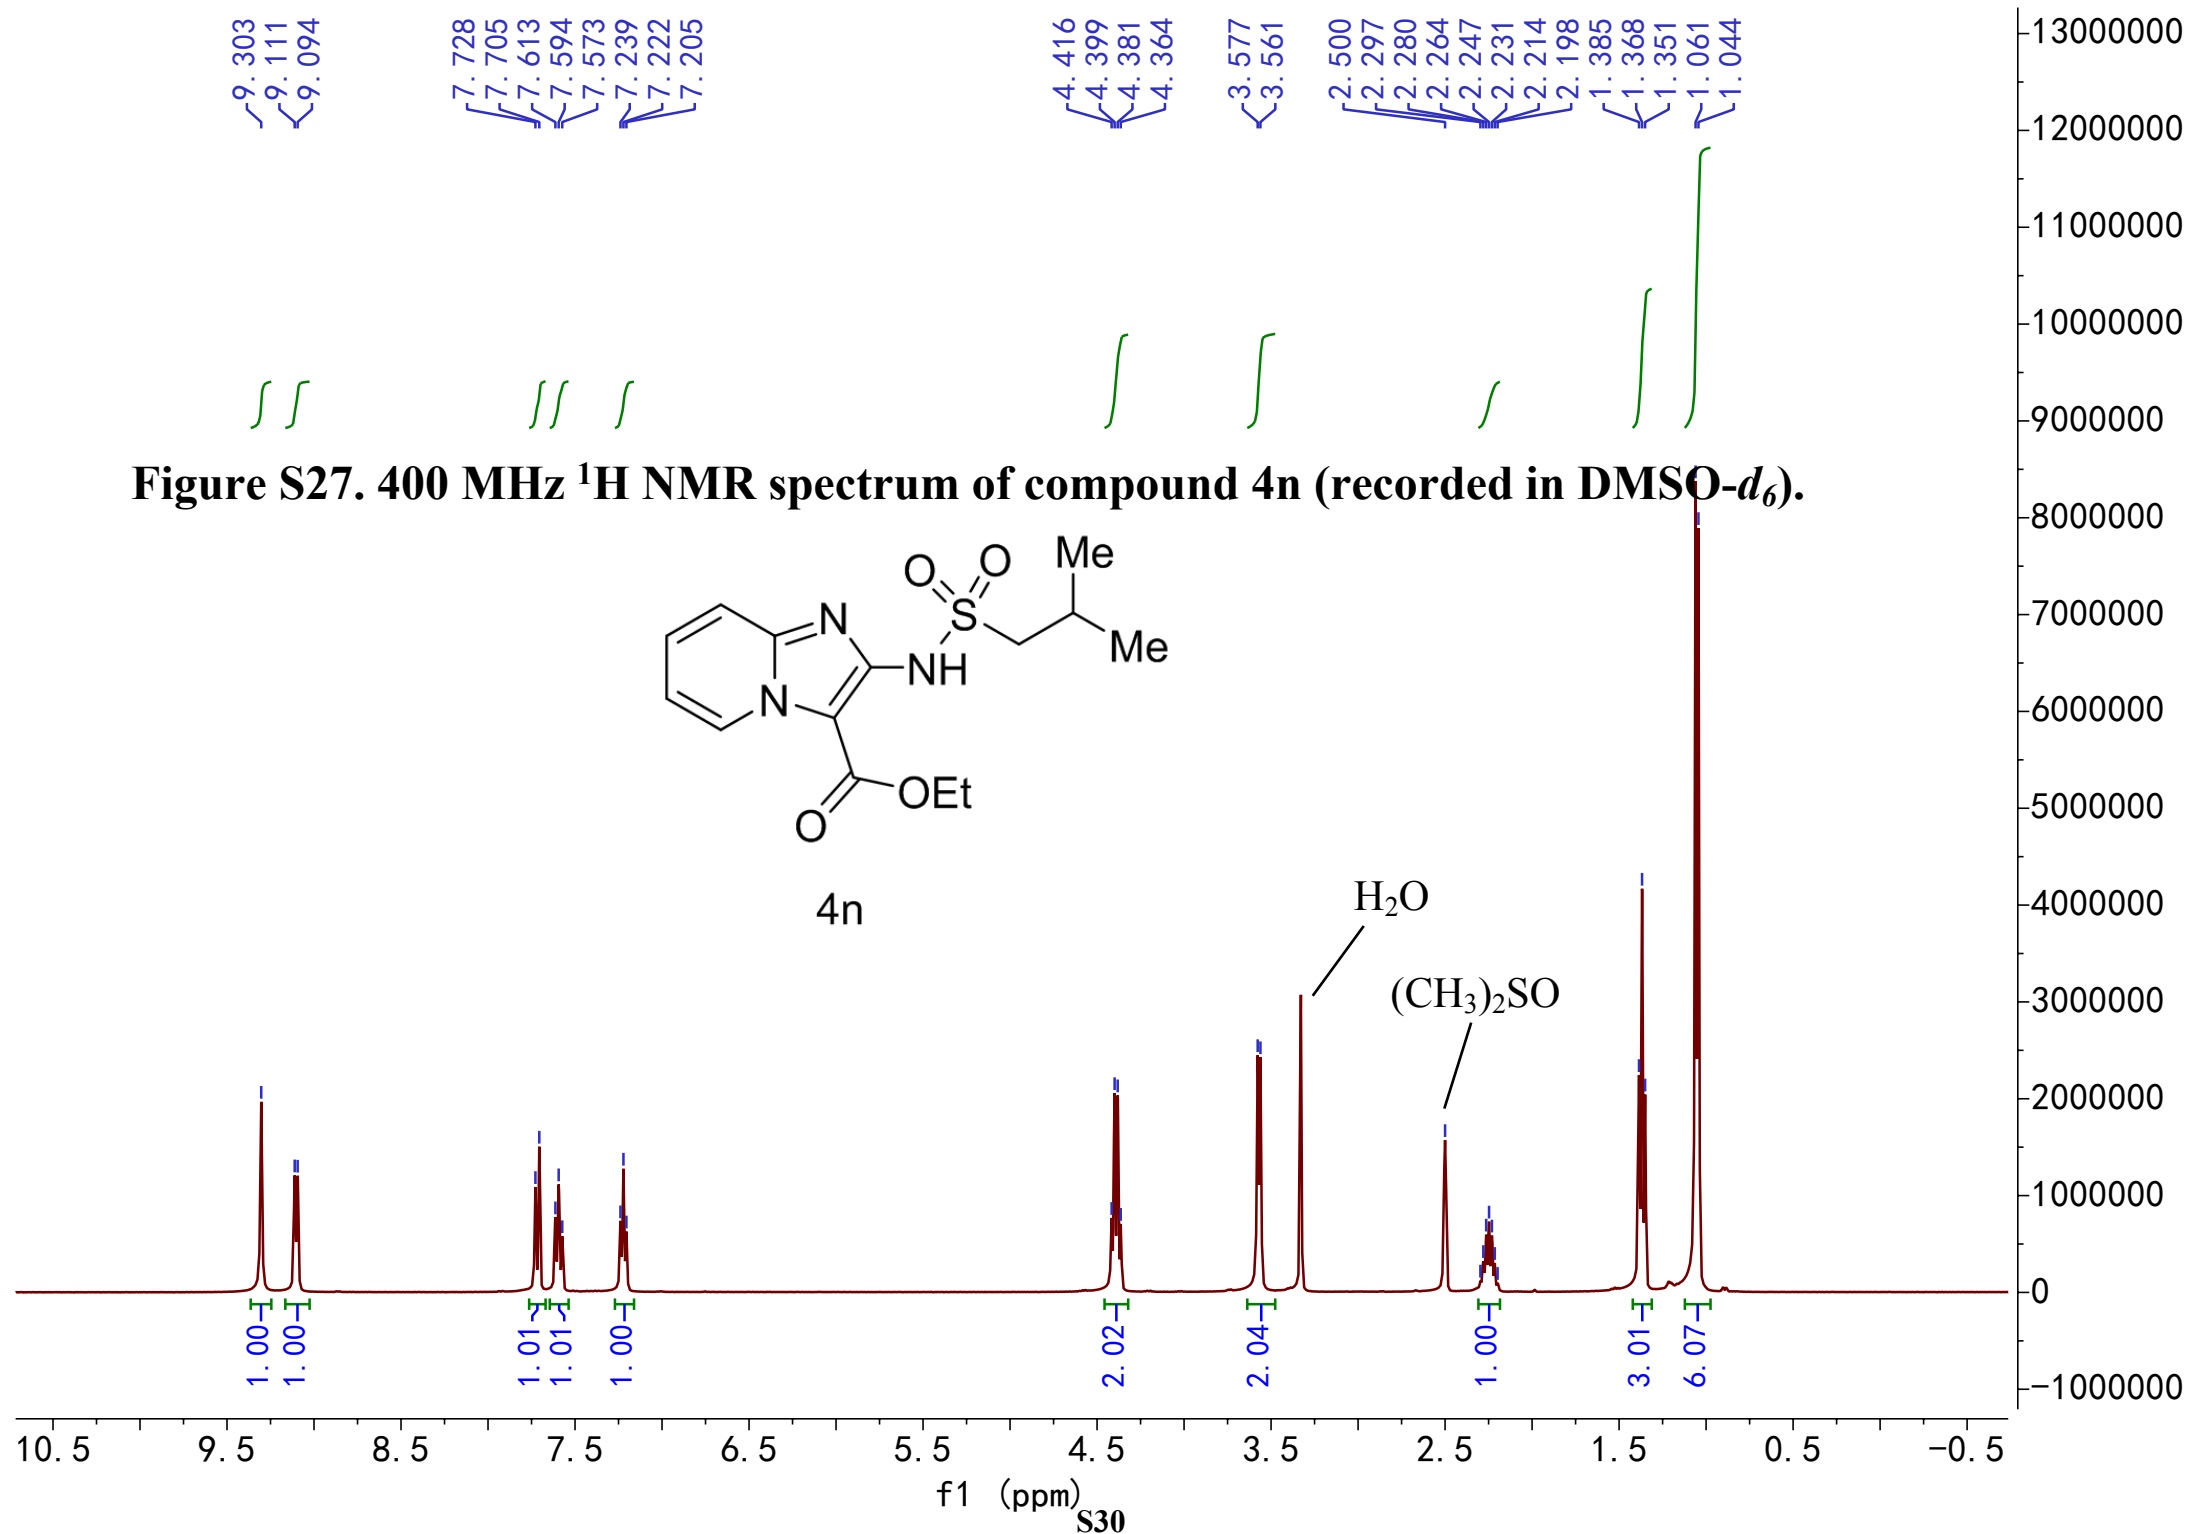

**Figure S28. 100 MHz  $^{13}\text{C}\{^1\text{H}\}$  NMR spectrum of compound 4n (recorded in DMSO- $d_6$ ).**

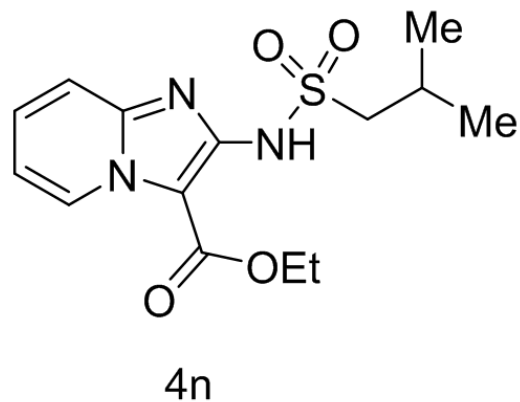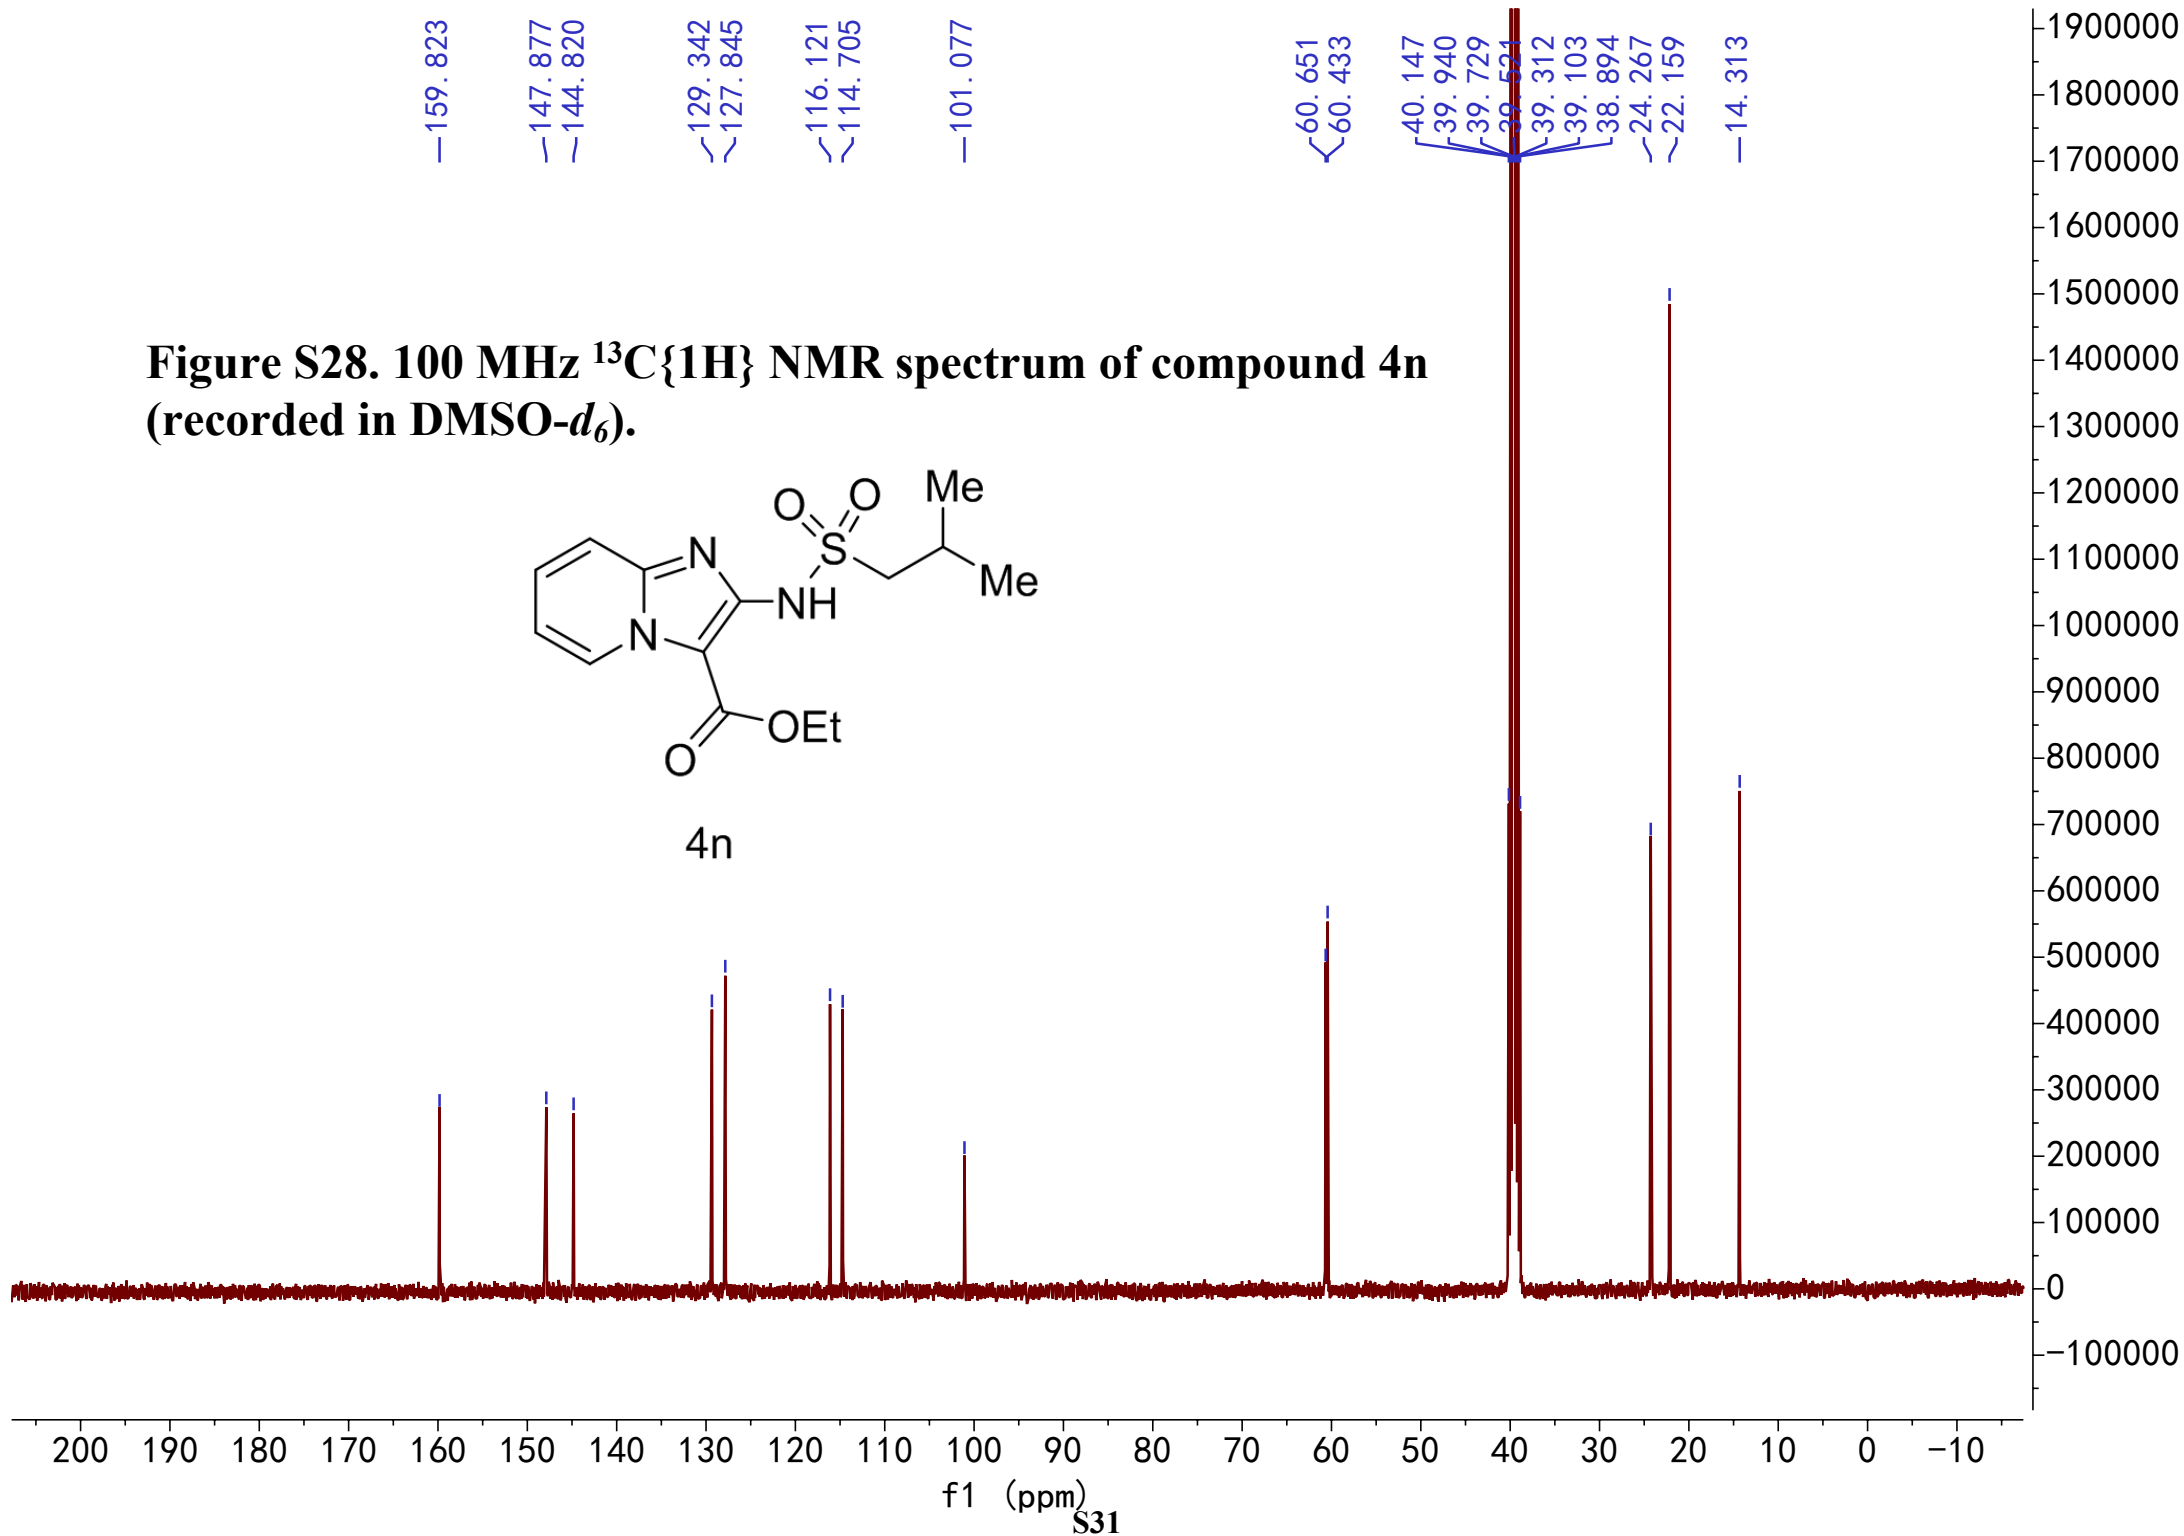

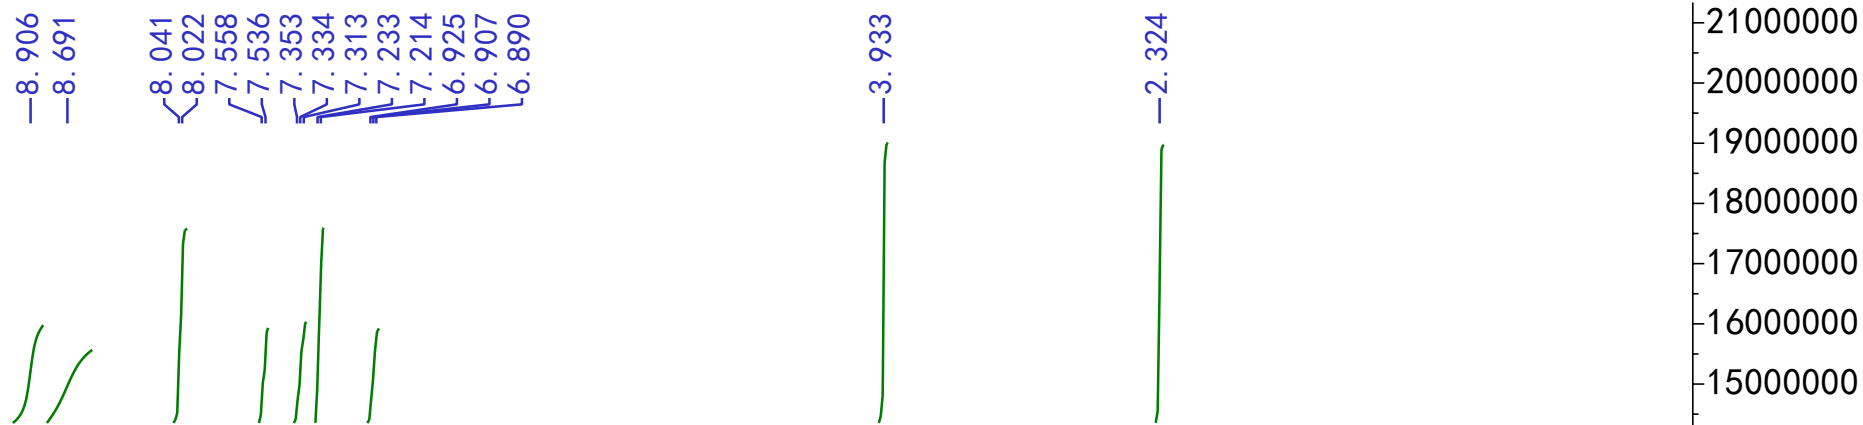

**Figure S29. 400 MHz <sup>1</sup>H NMR spectrum of compound 4o (recorded in CDCl<sub>3</sub>).**

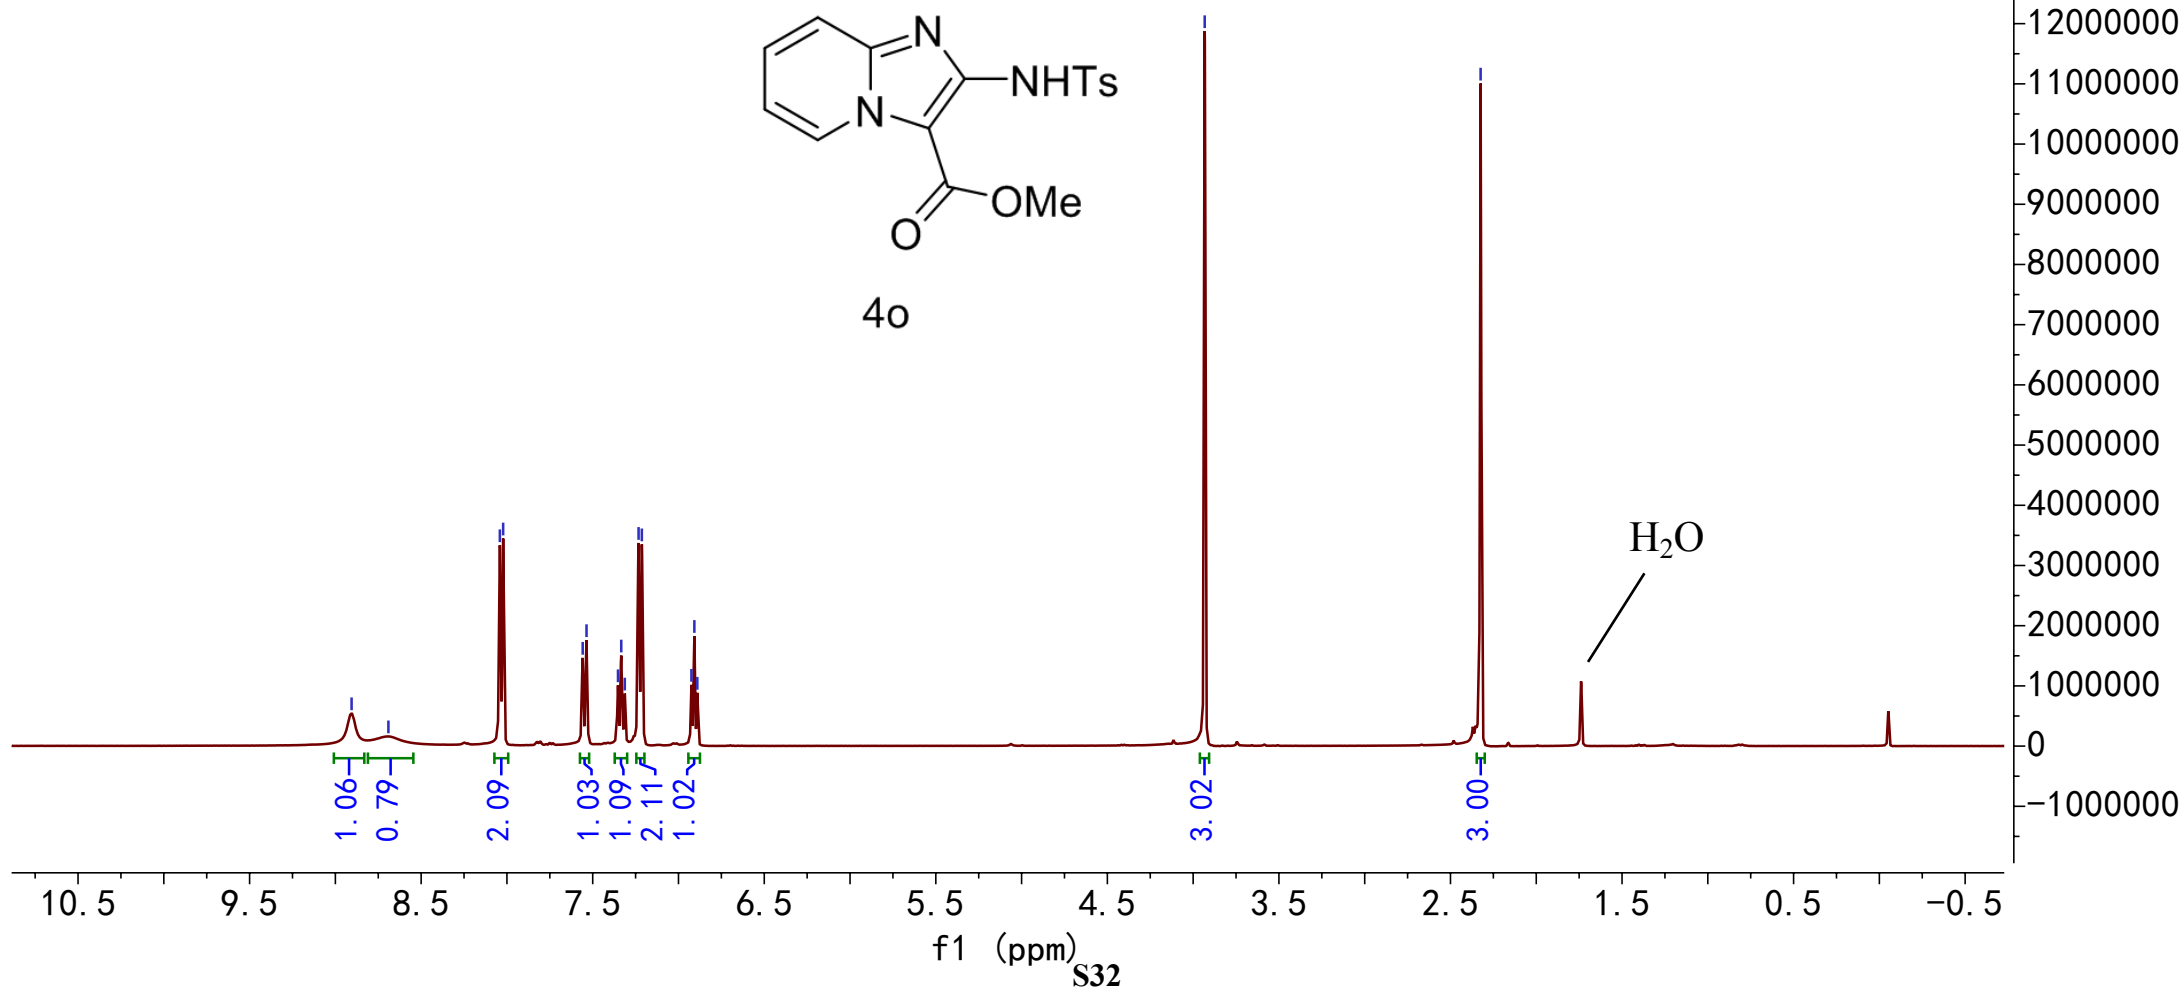



**Figure S30. 100 MHz  $^{13}\text{C}\{^1\text{H}\}$  NMR spectrum of compound 4o (recorded in  $\text{CDCl}_3$ ).**

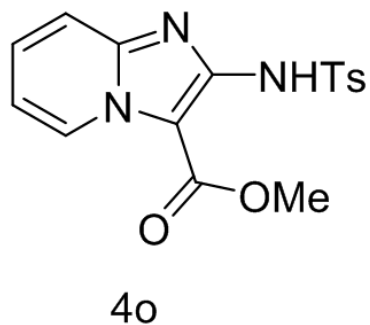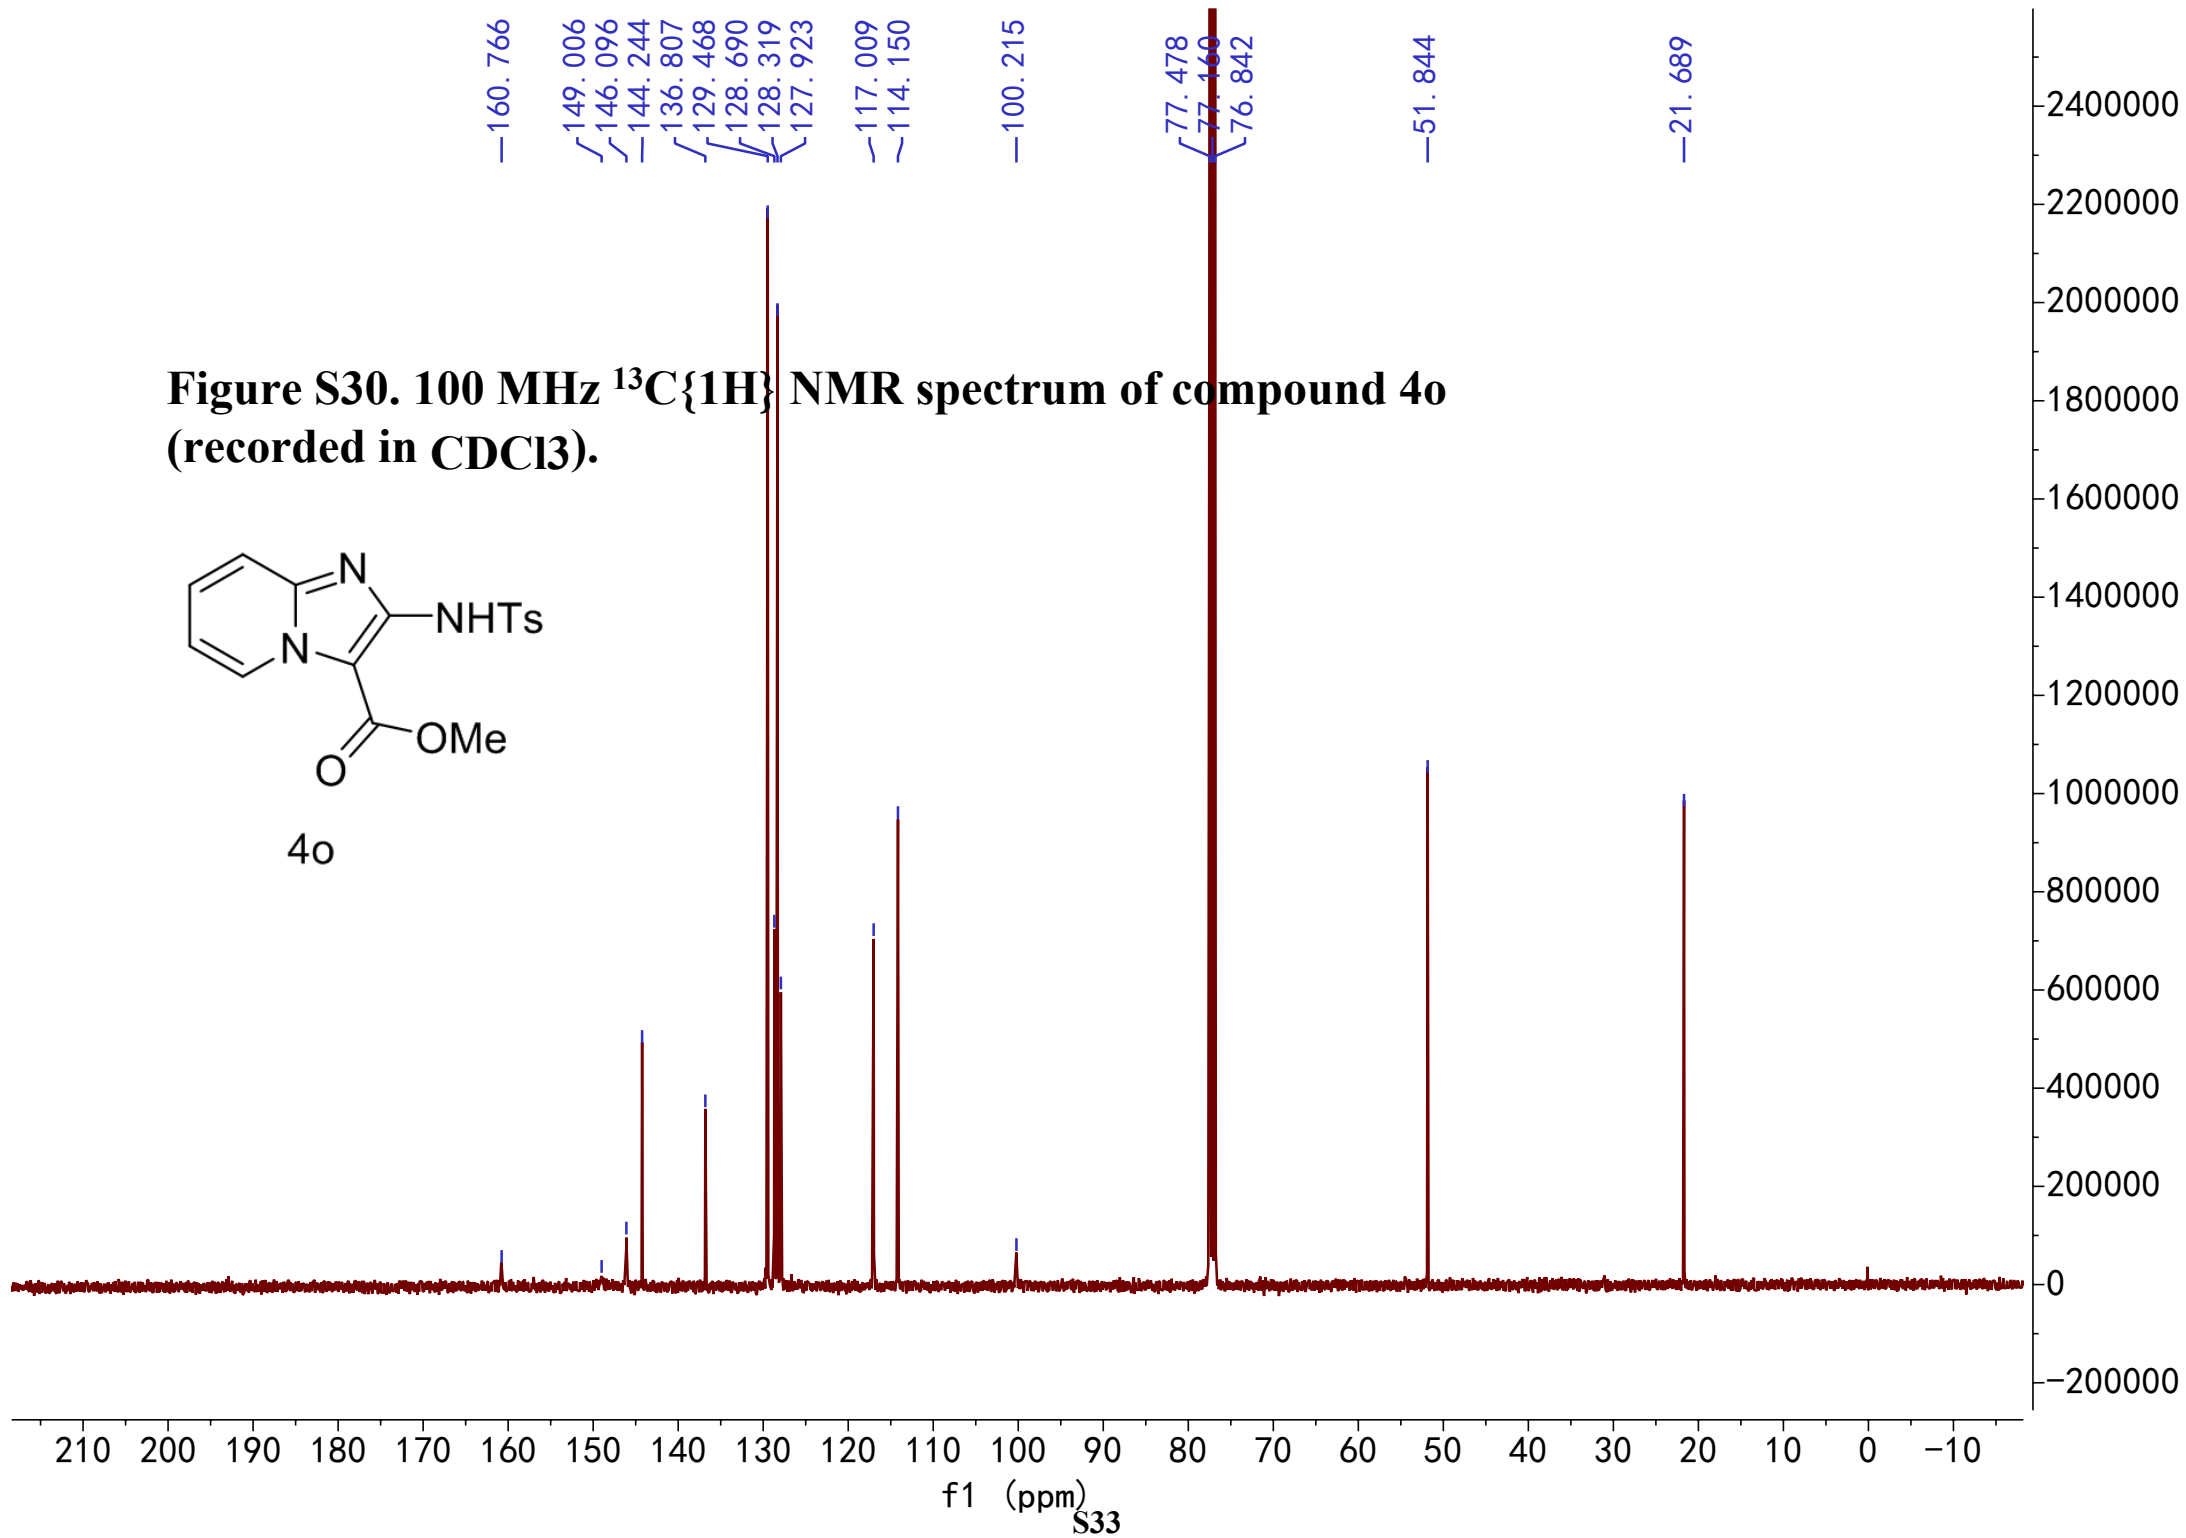

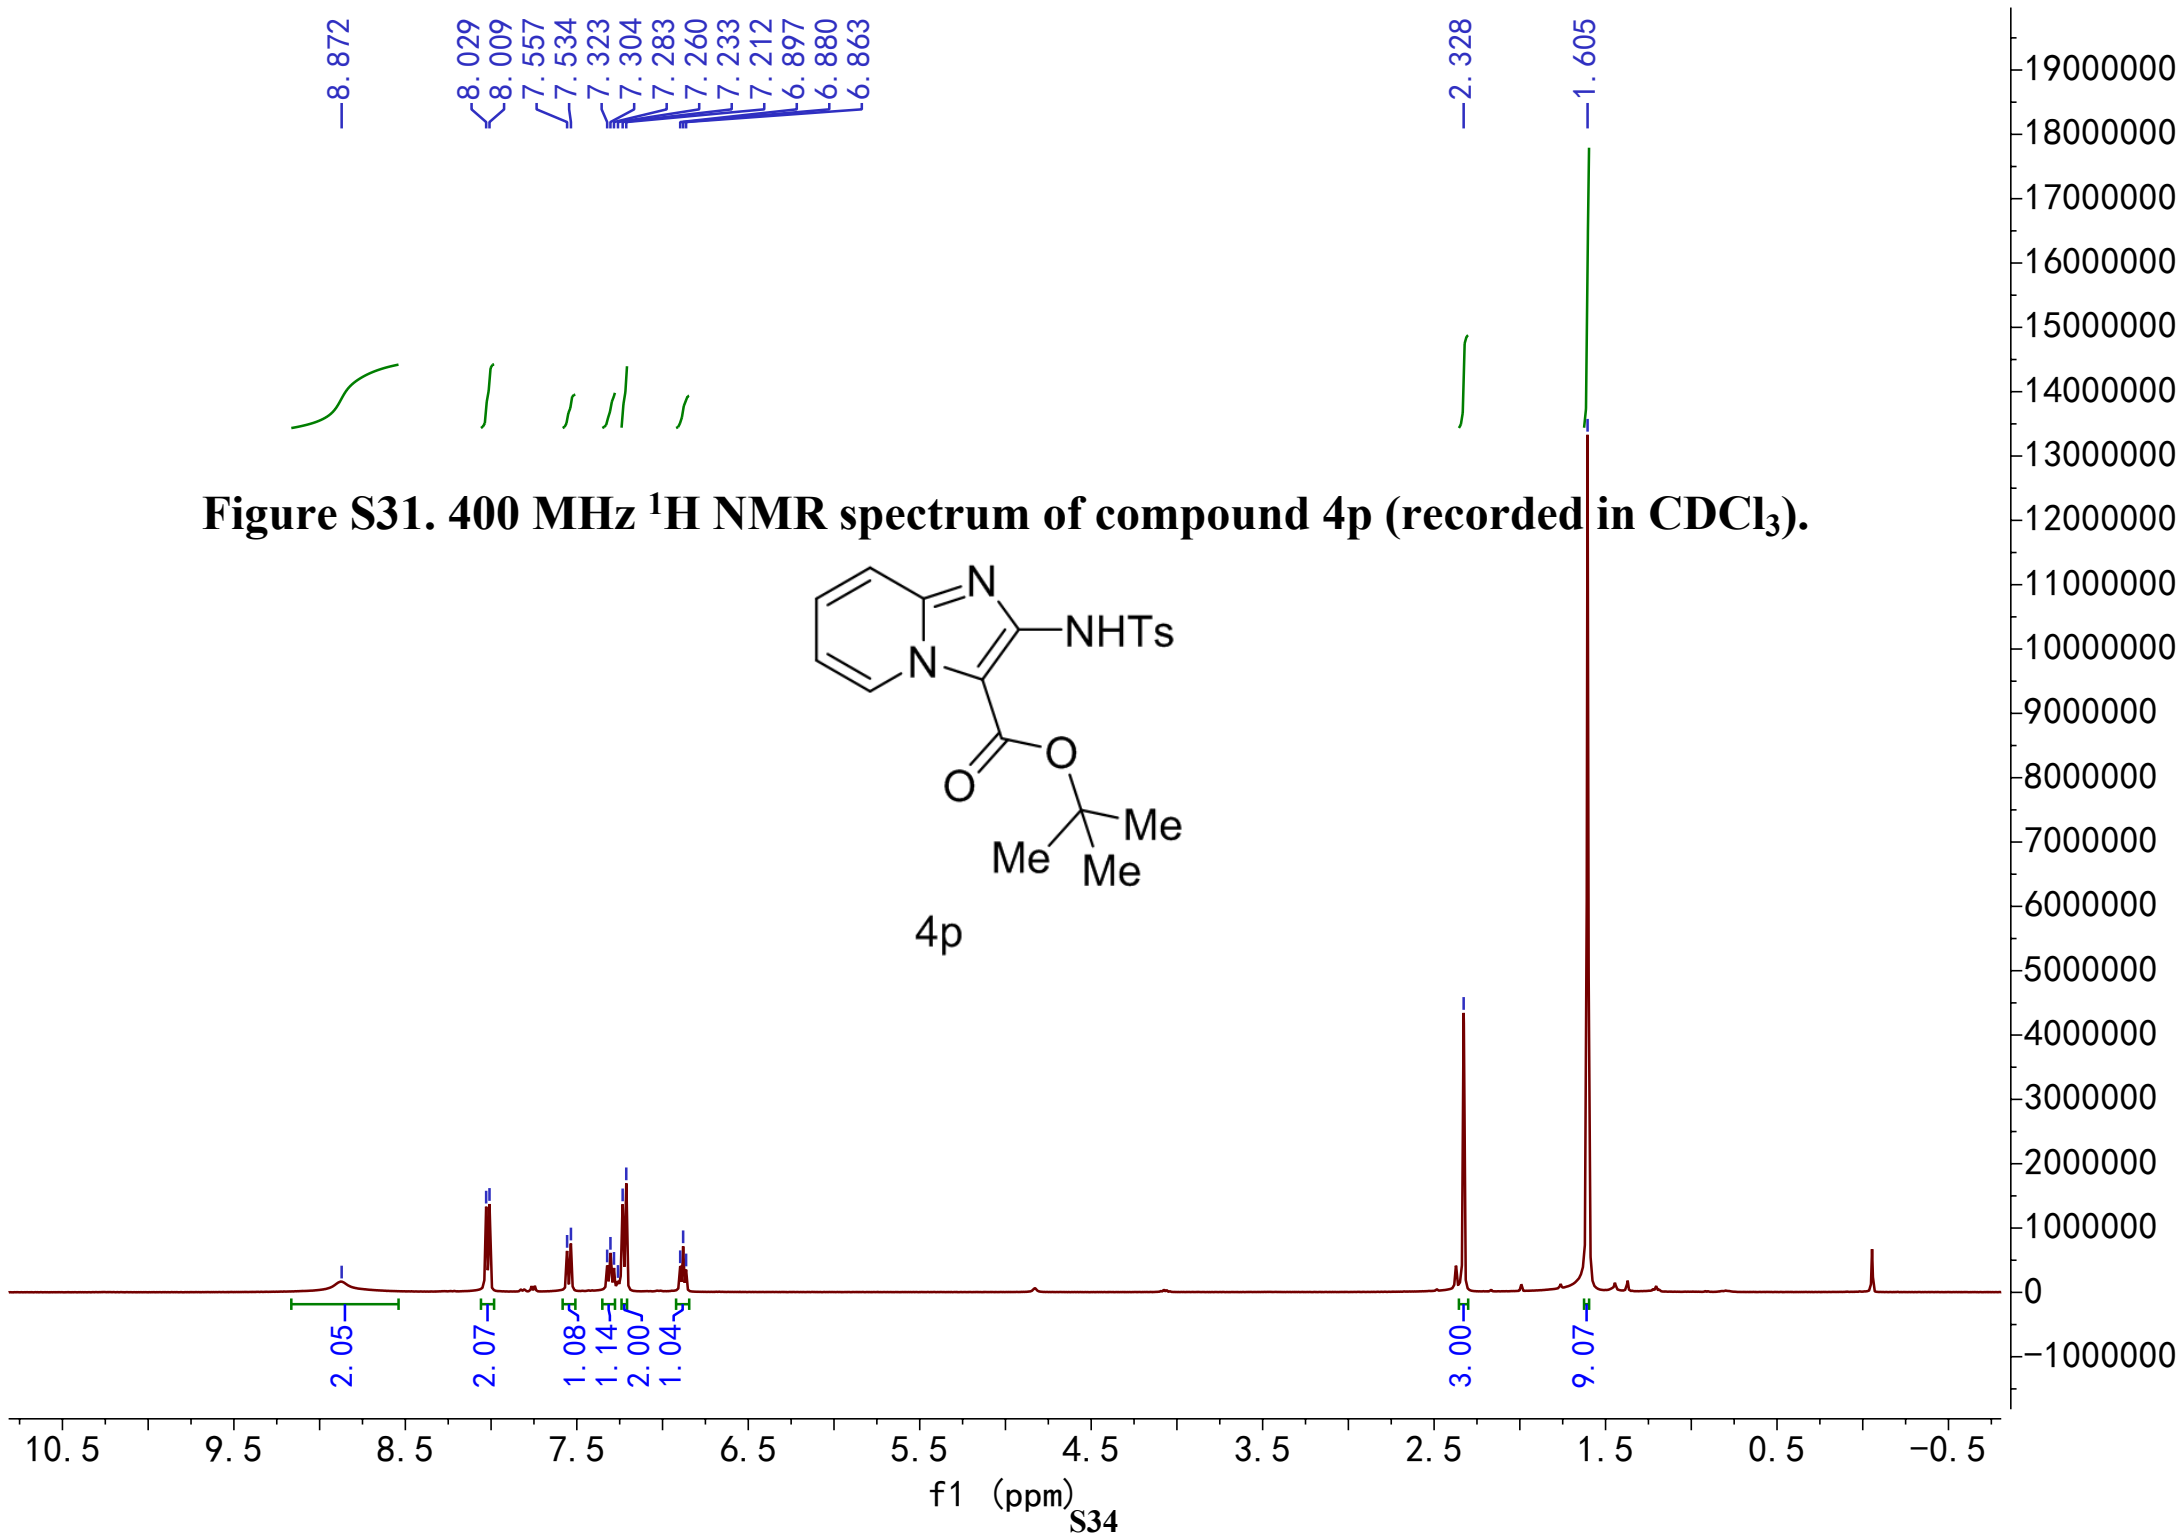

**Figure S32. 100 MHz  $^{13}\text{C}\{^1\text{H}\}$  NMR spectrum of compound 4p (recorded in  $\text{CDCl}_3$ ).**

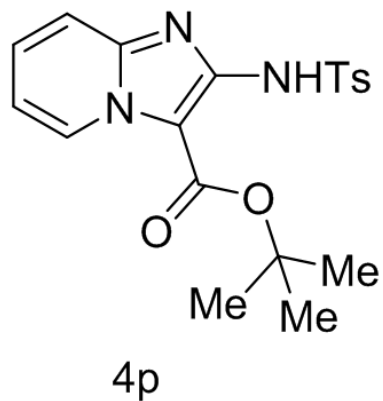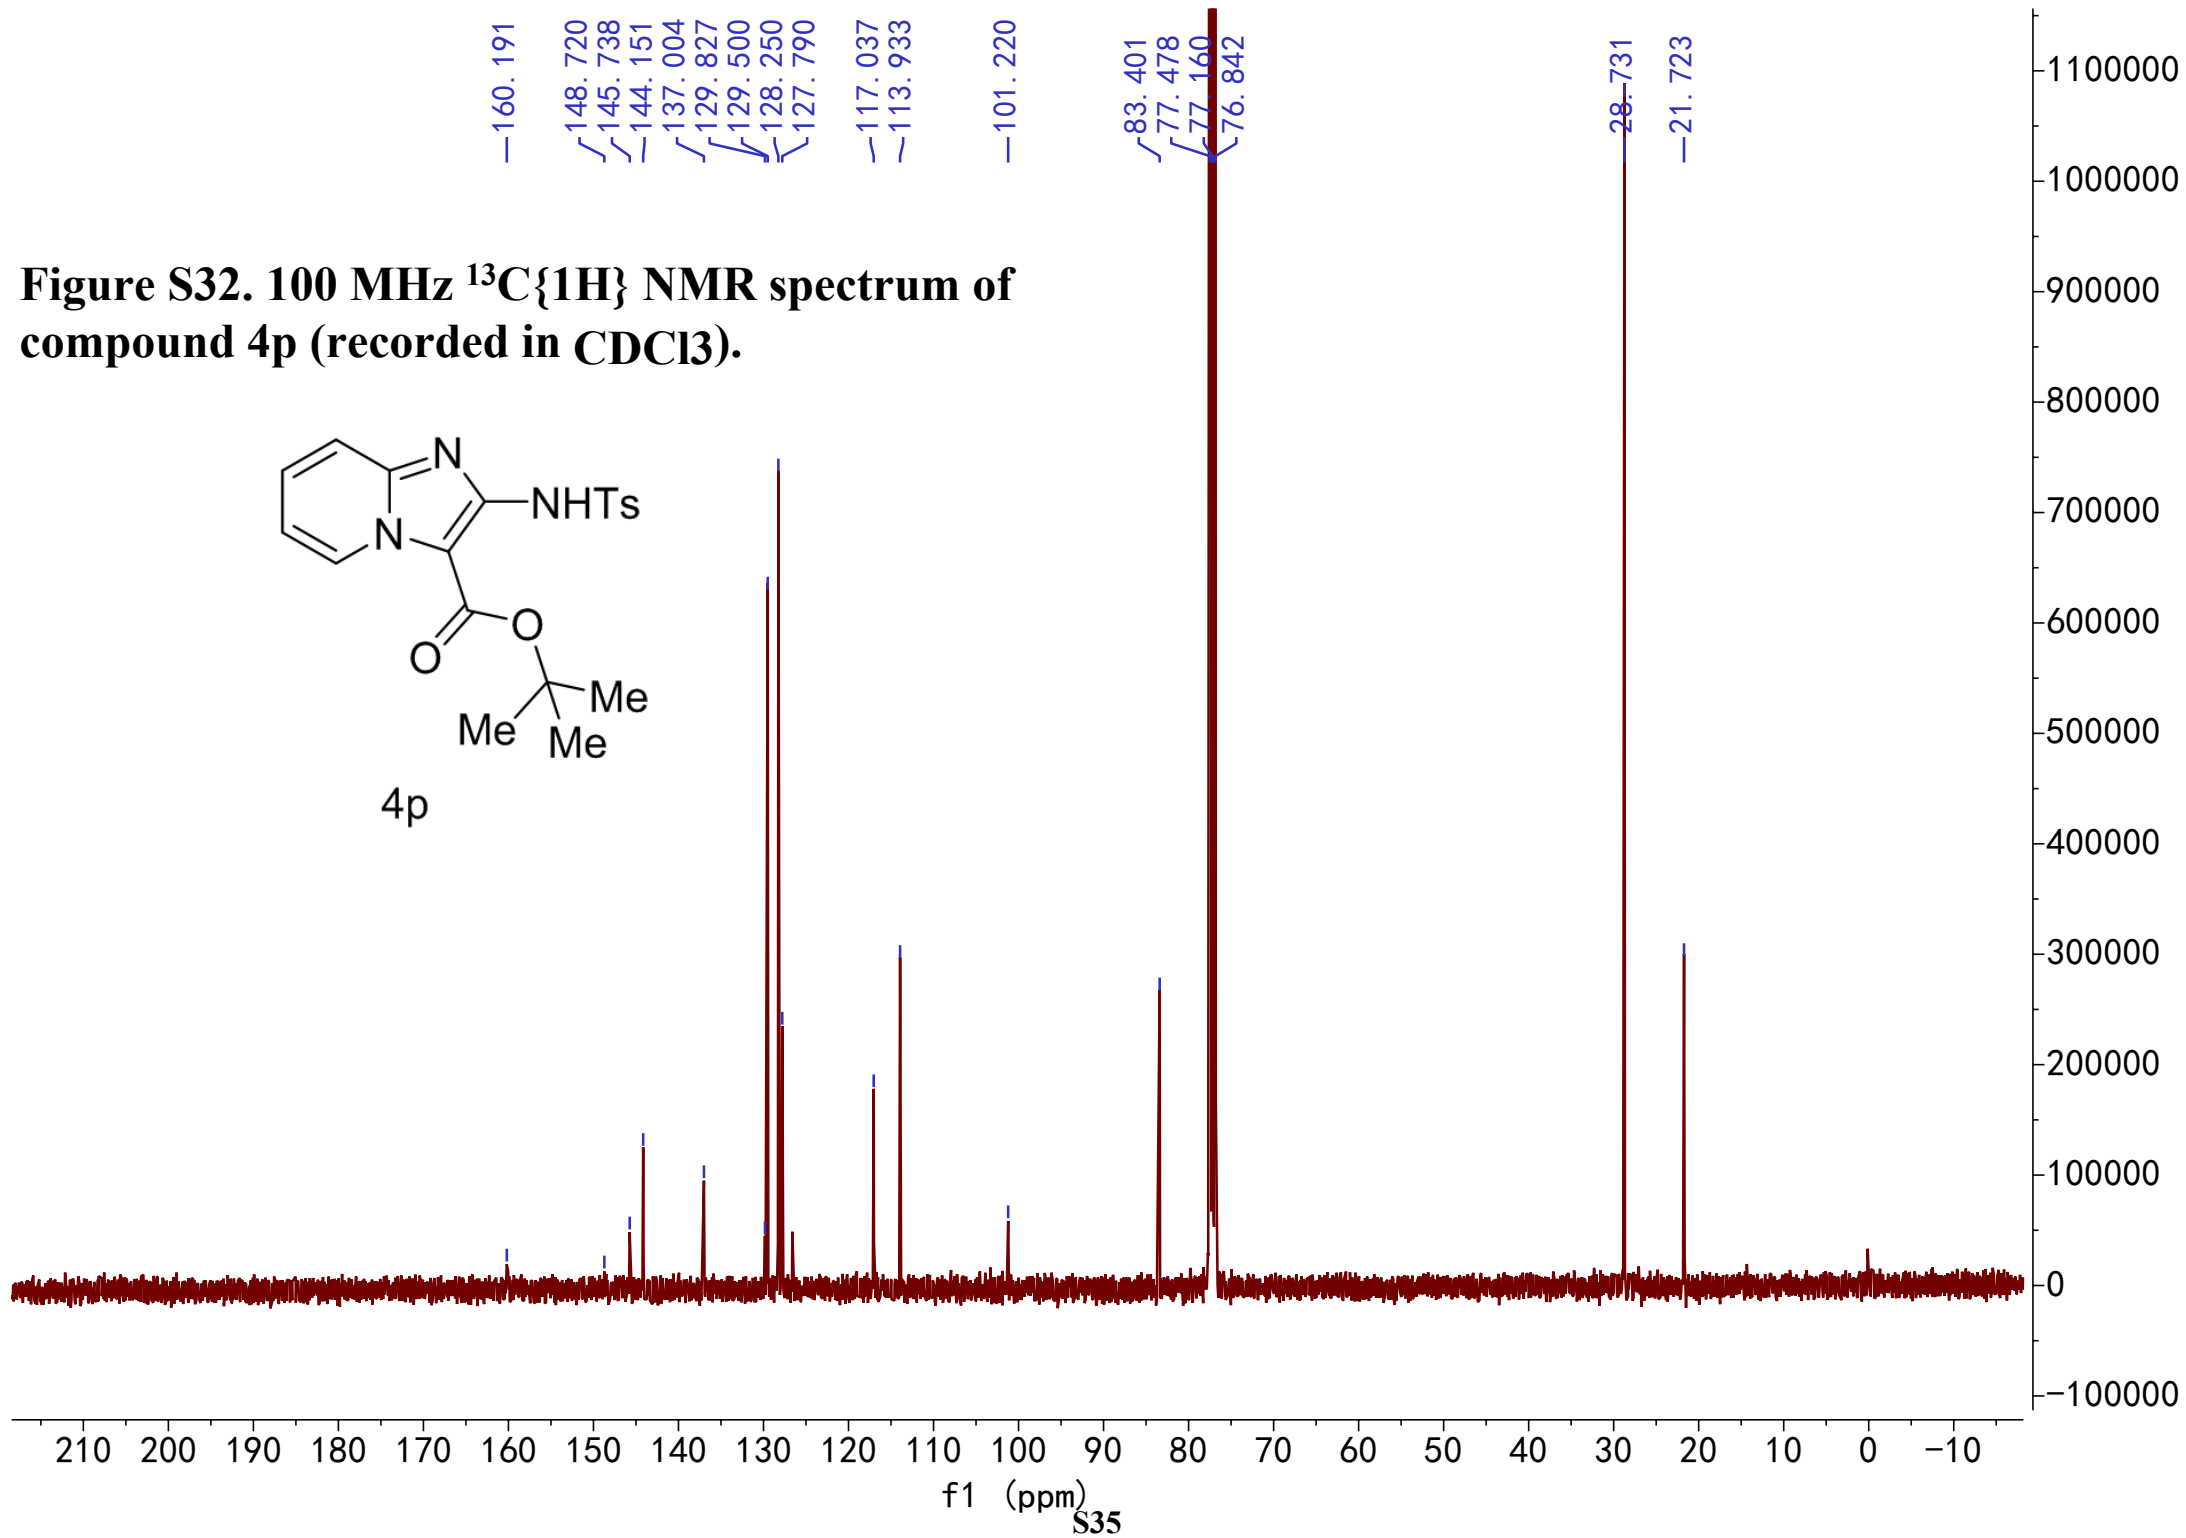

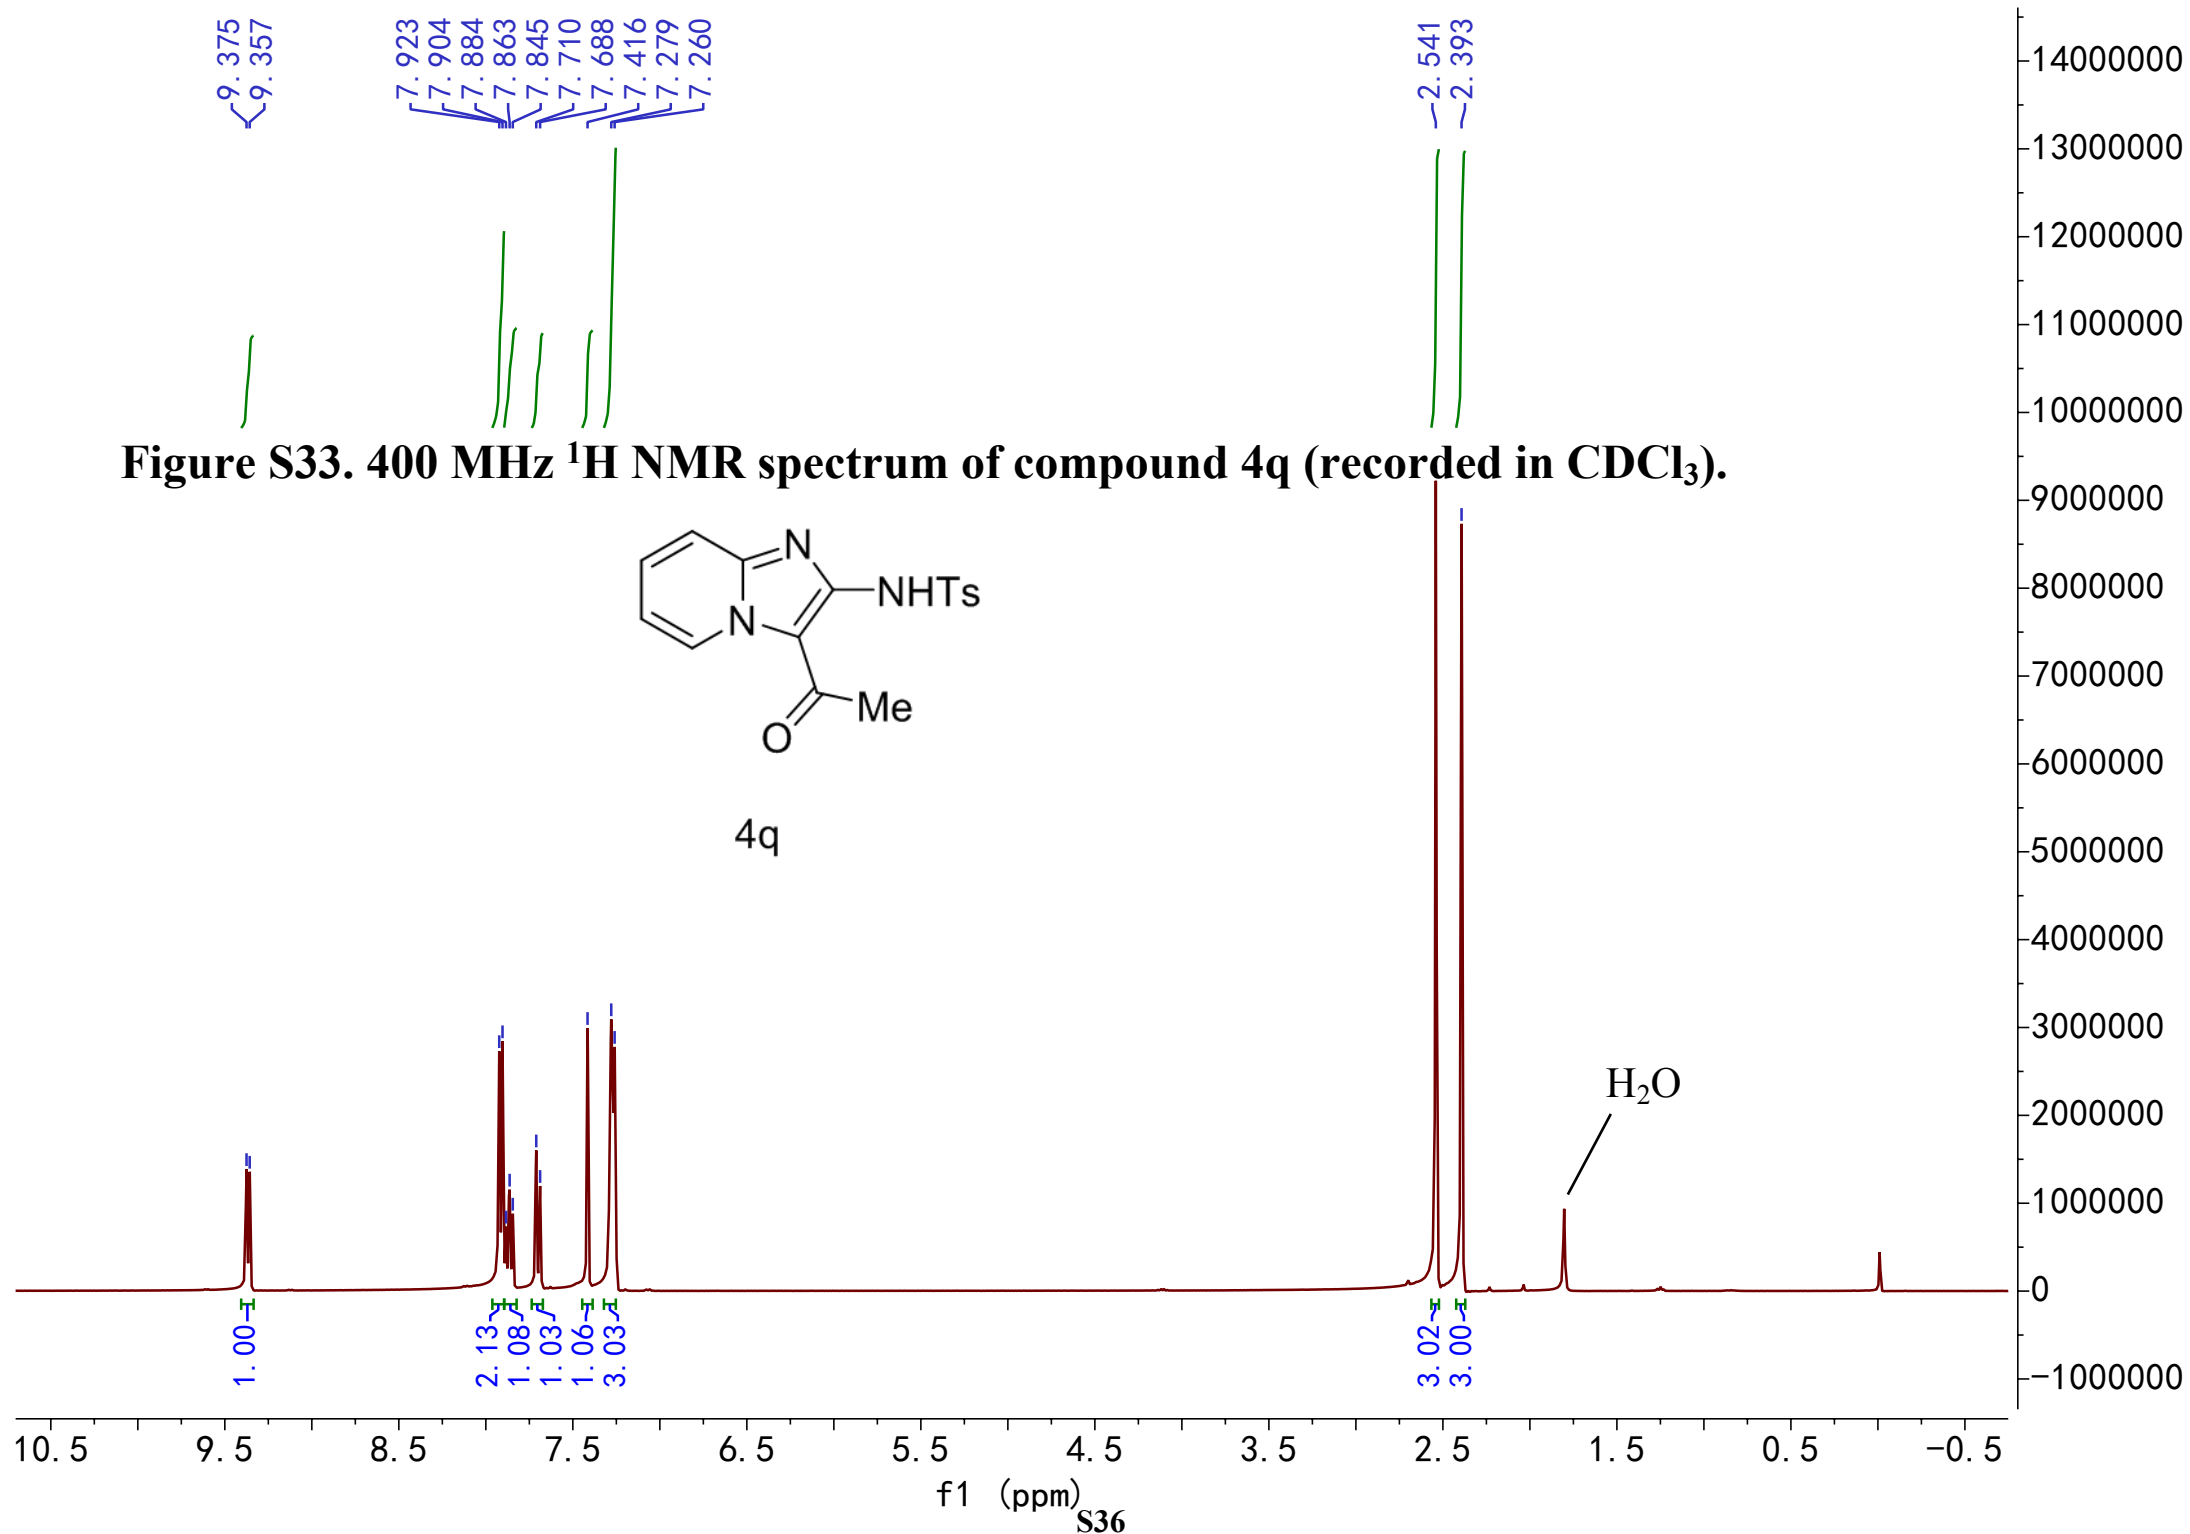

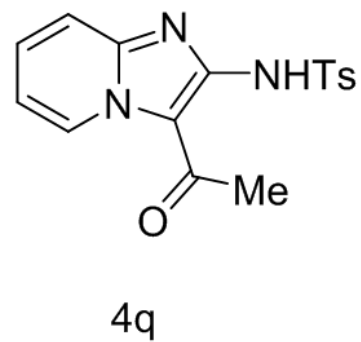

— 165.571  
— 152.051  
— 149.515  
— 142.534  
— 140.068  
— 137.054  
— 129.382  
— 128.562  
— 126.675  
— 126.465  
— 117.354  
— 103.279  
— 77.478  
— 77.160  
— 76.842  
— 25.183  
— 21.593

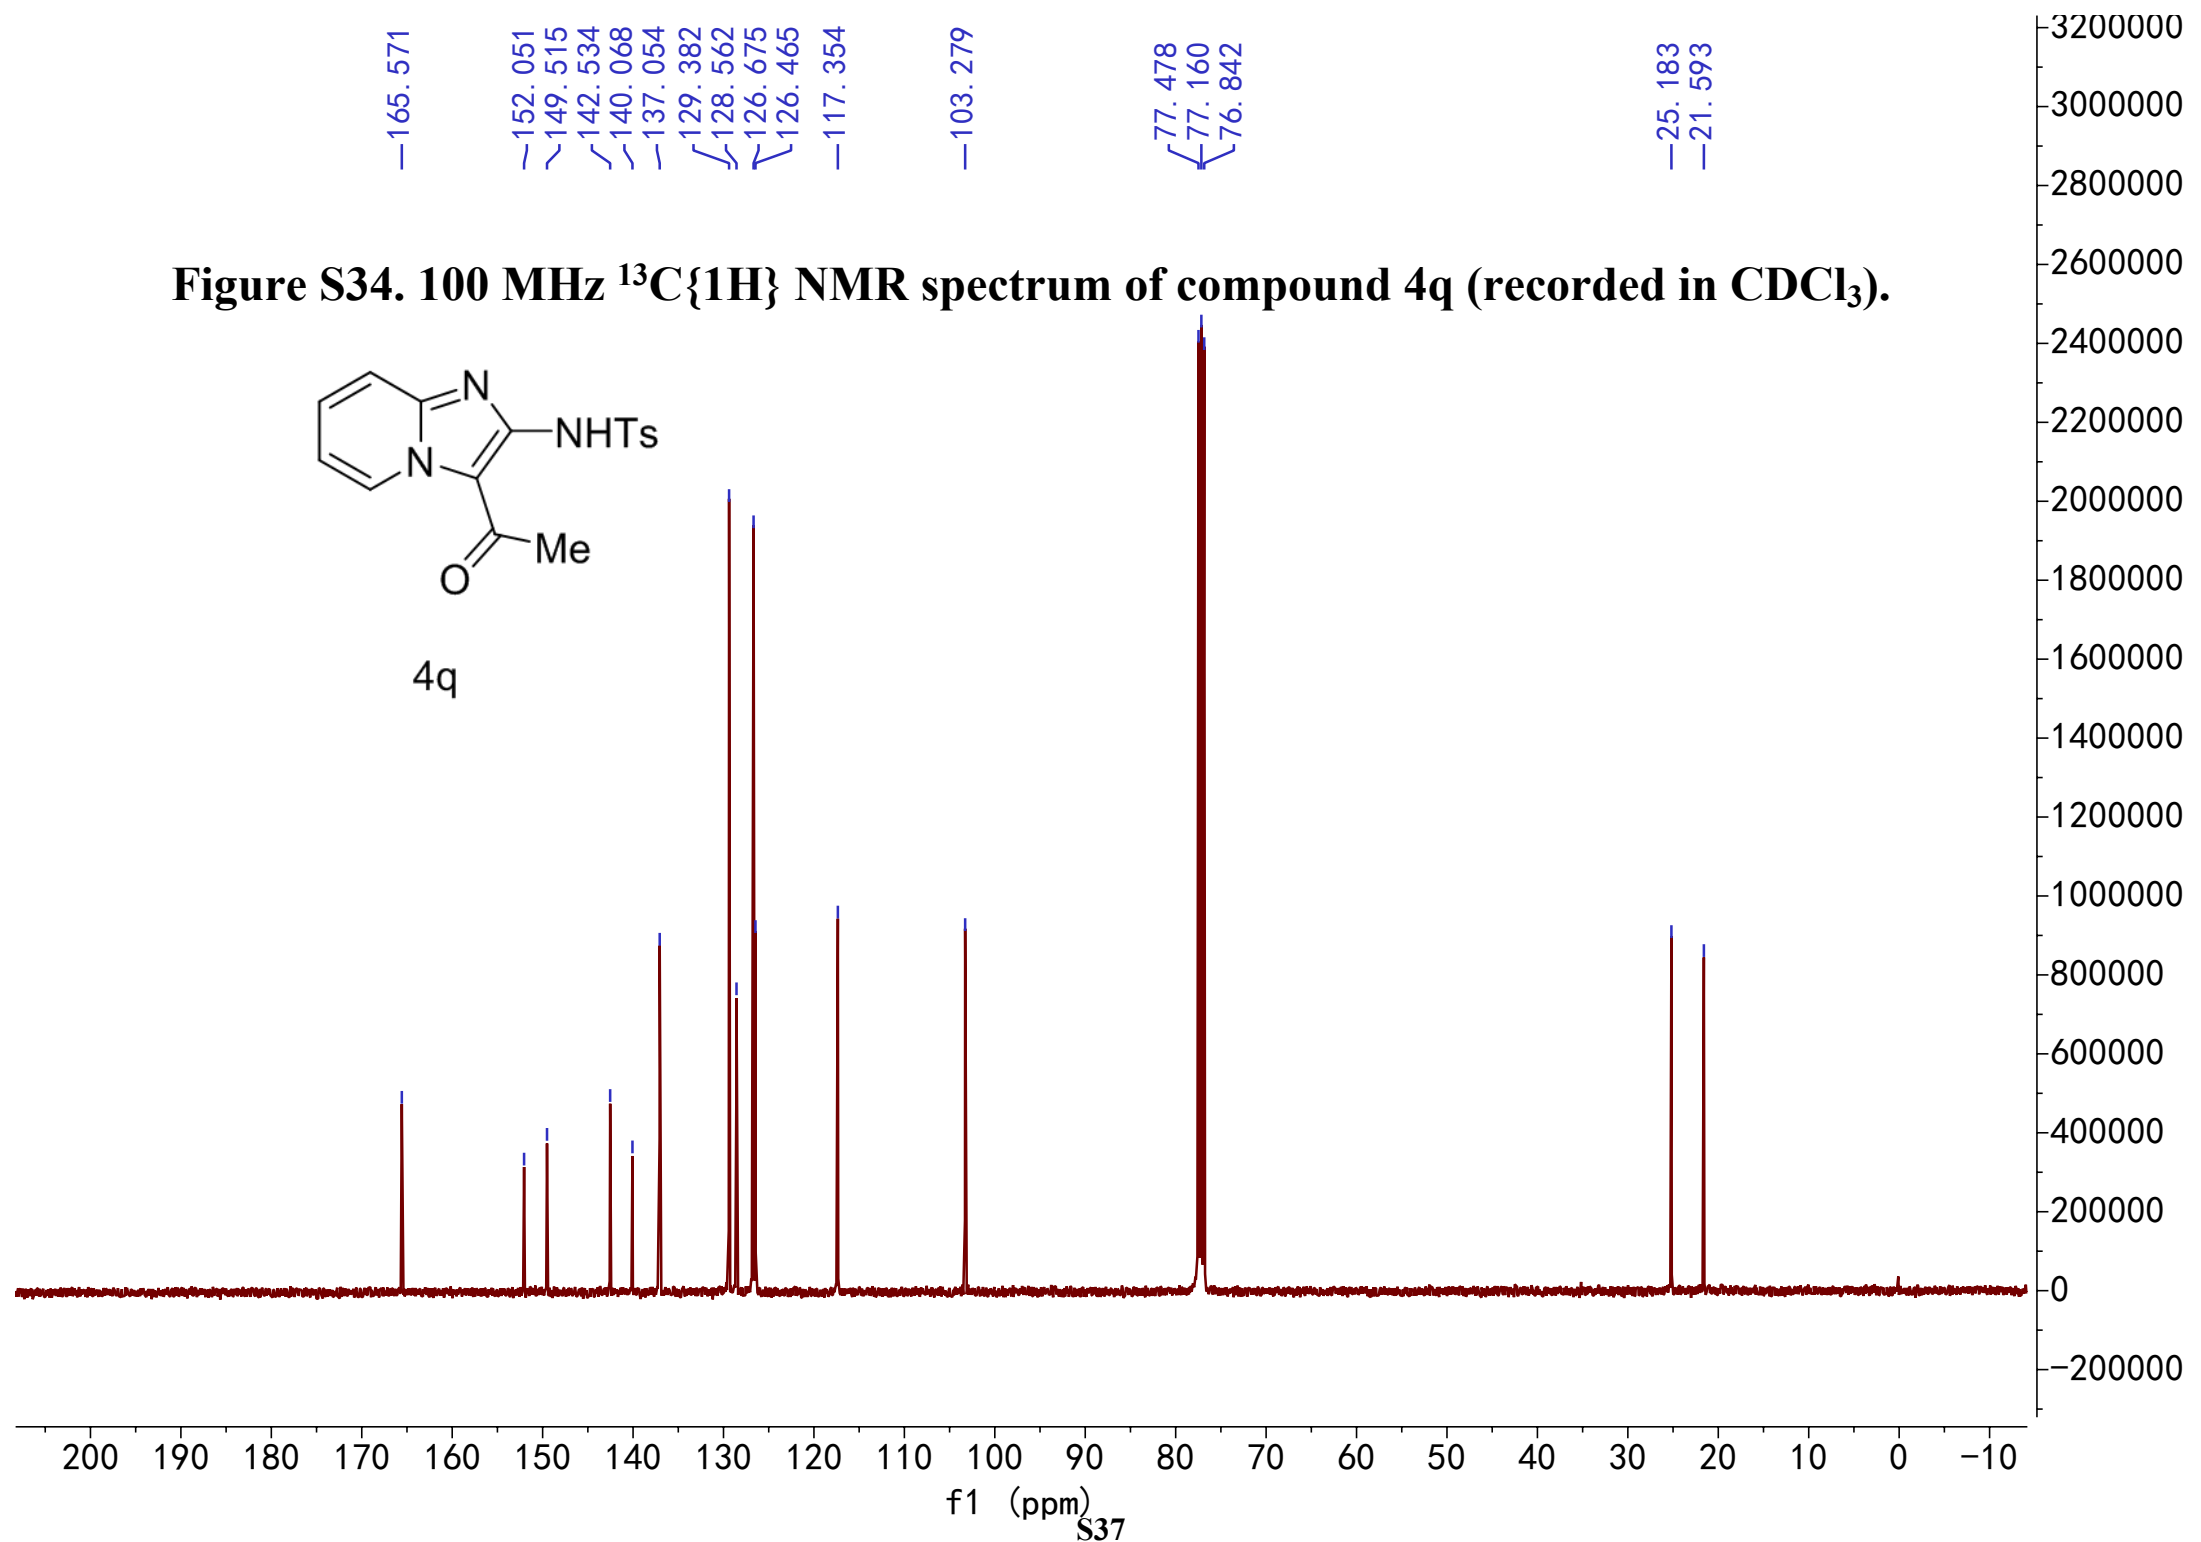

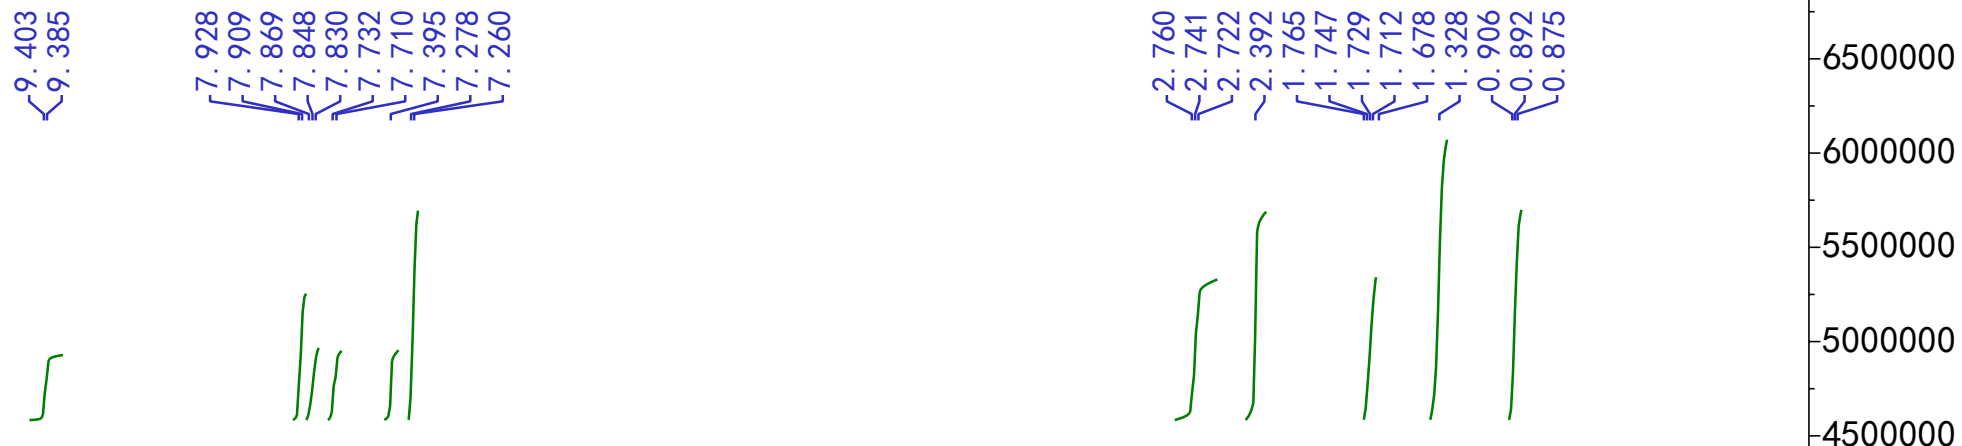

**Figure S35. 400 MHz  $^1\text{H}$  NMR spectrum of compound 4r (recorded in  $\text{CDCl}_3$ ).**

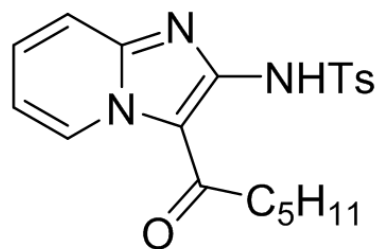

4r

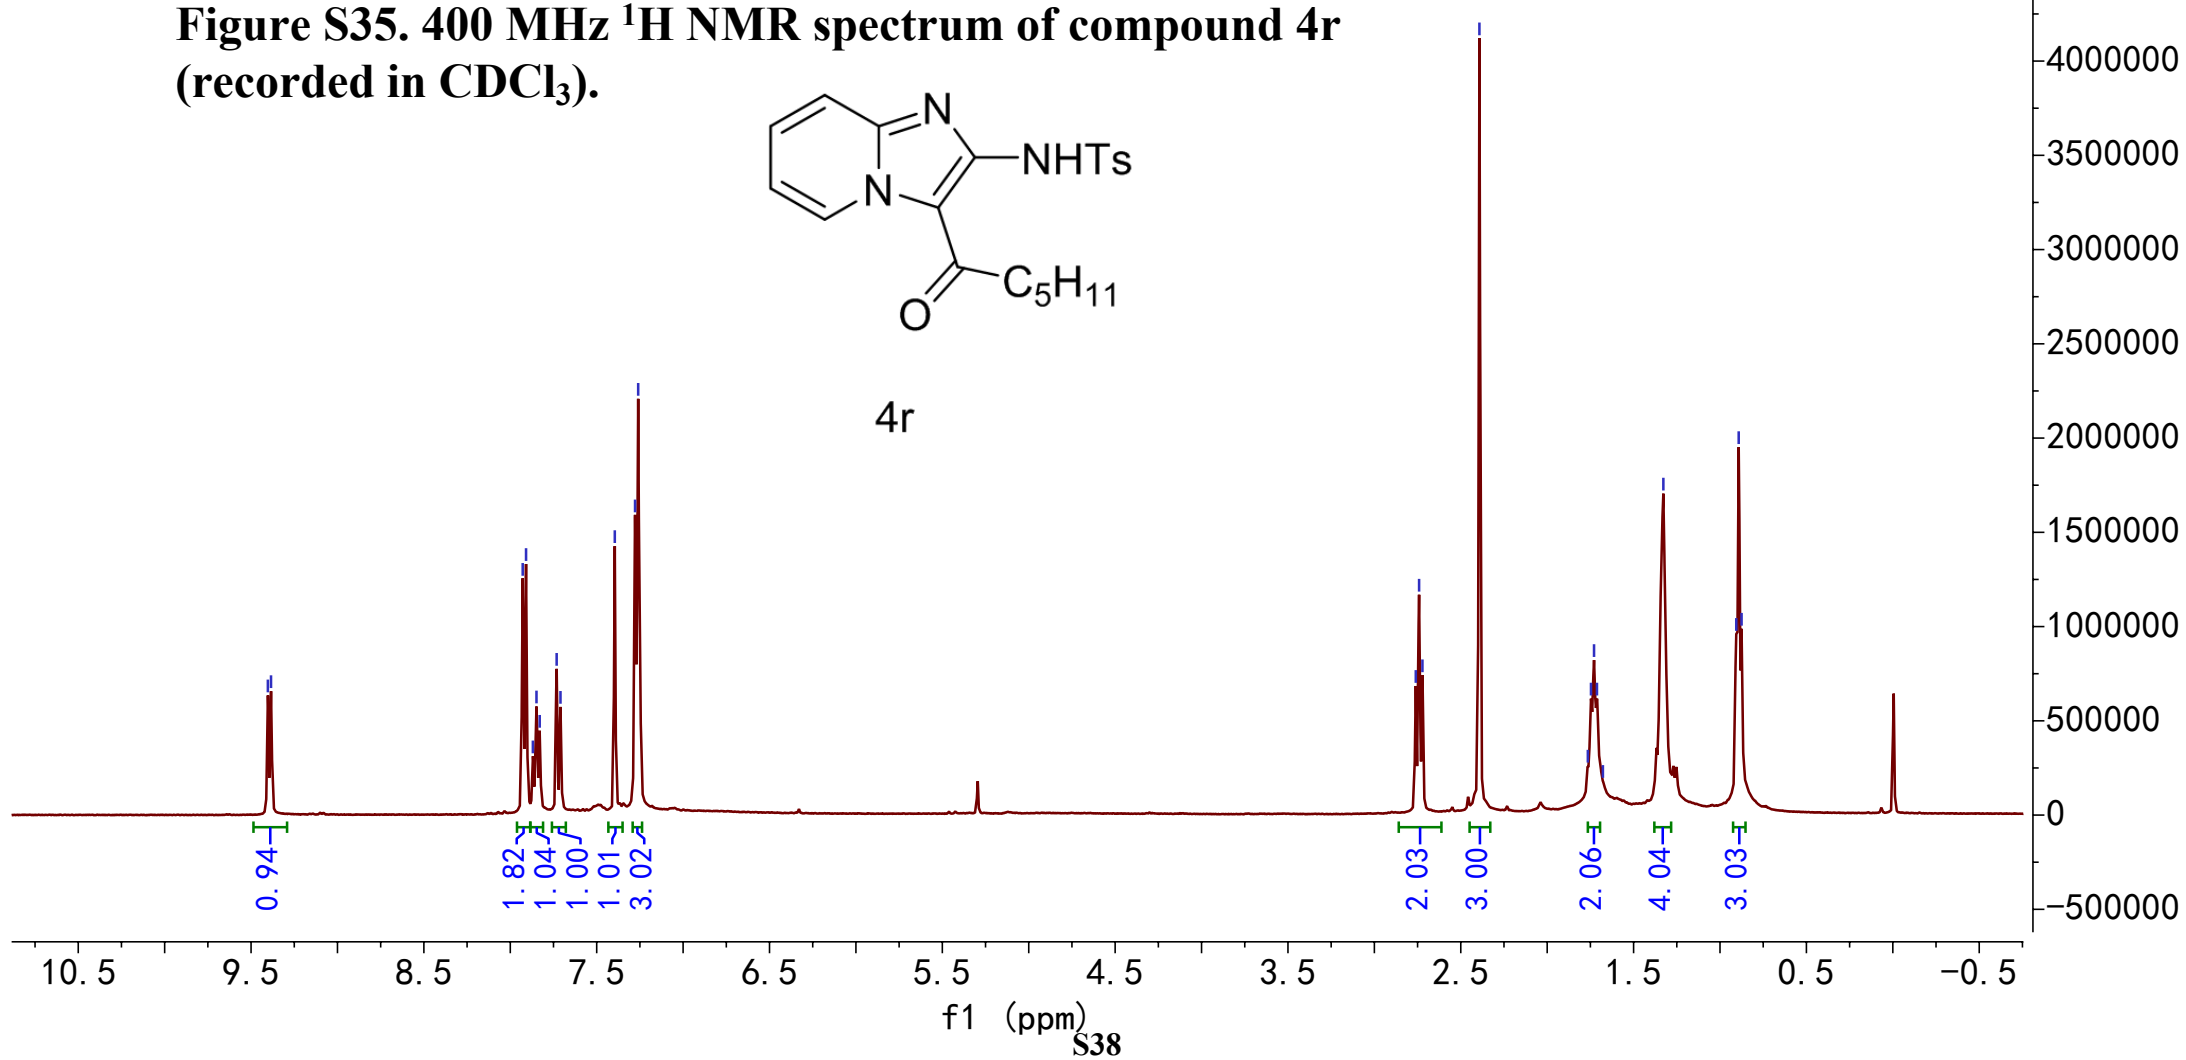

—169.496  
 —152.289  
 —149.689  
 —142.512  
 —140.078  
 —136.804  
 —129.387  
 —128.642  
 —126.791  
 —126.668  
 —117.255  
 —102.790  
 —77.478  
 —77.362  
 —77.160  
 —76.980  
 —76.843  
 —38.775  
 —31.586  
 —28.494  
 —22.577  
 —21.611  
 —14.077

**Figure S36. 100 MHz  $^{13}\text{C}\{^1\text{H}\}$  NMR spectrum of compound 4r (recorded in  $\text{CDCl}_3$ ).**

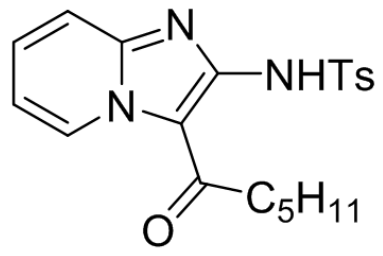

4r

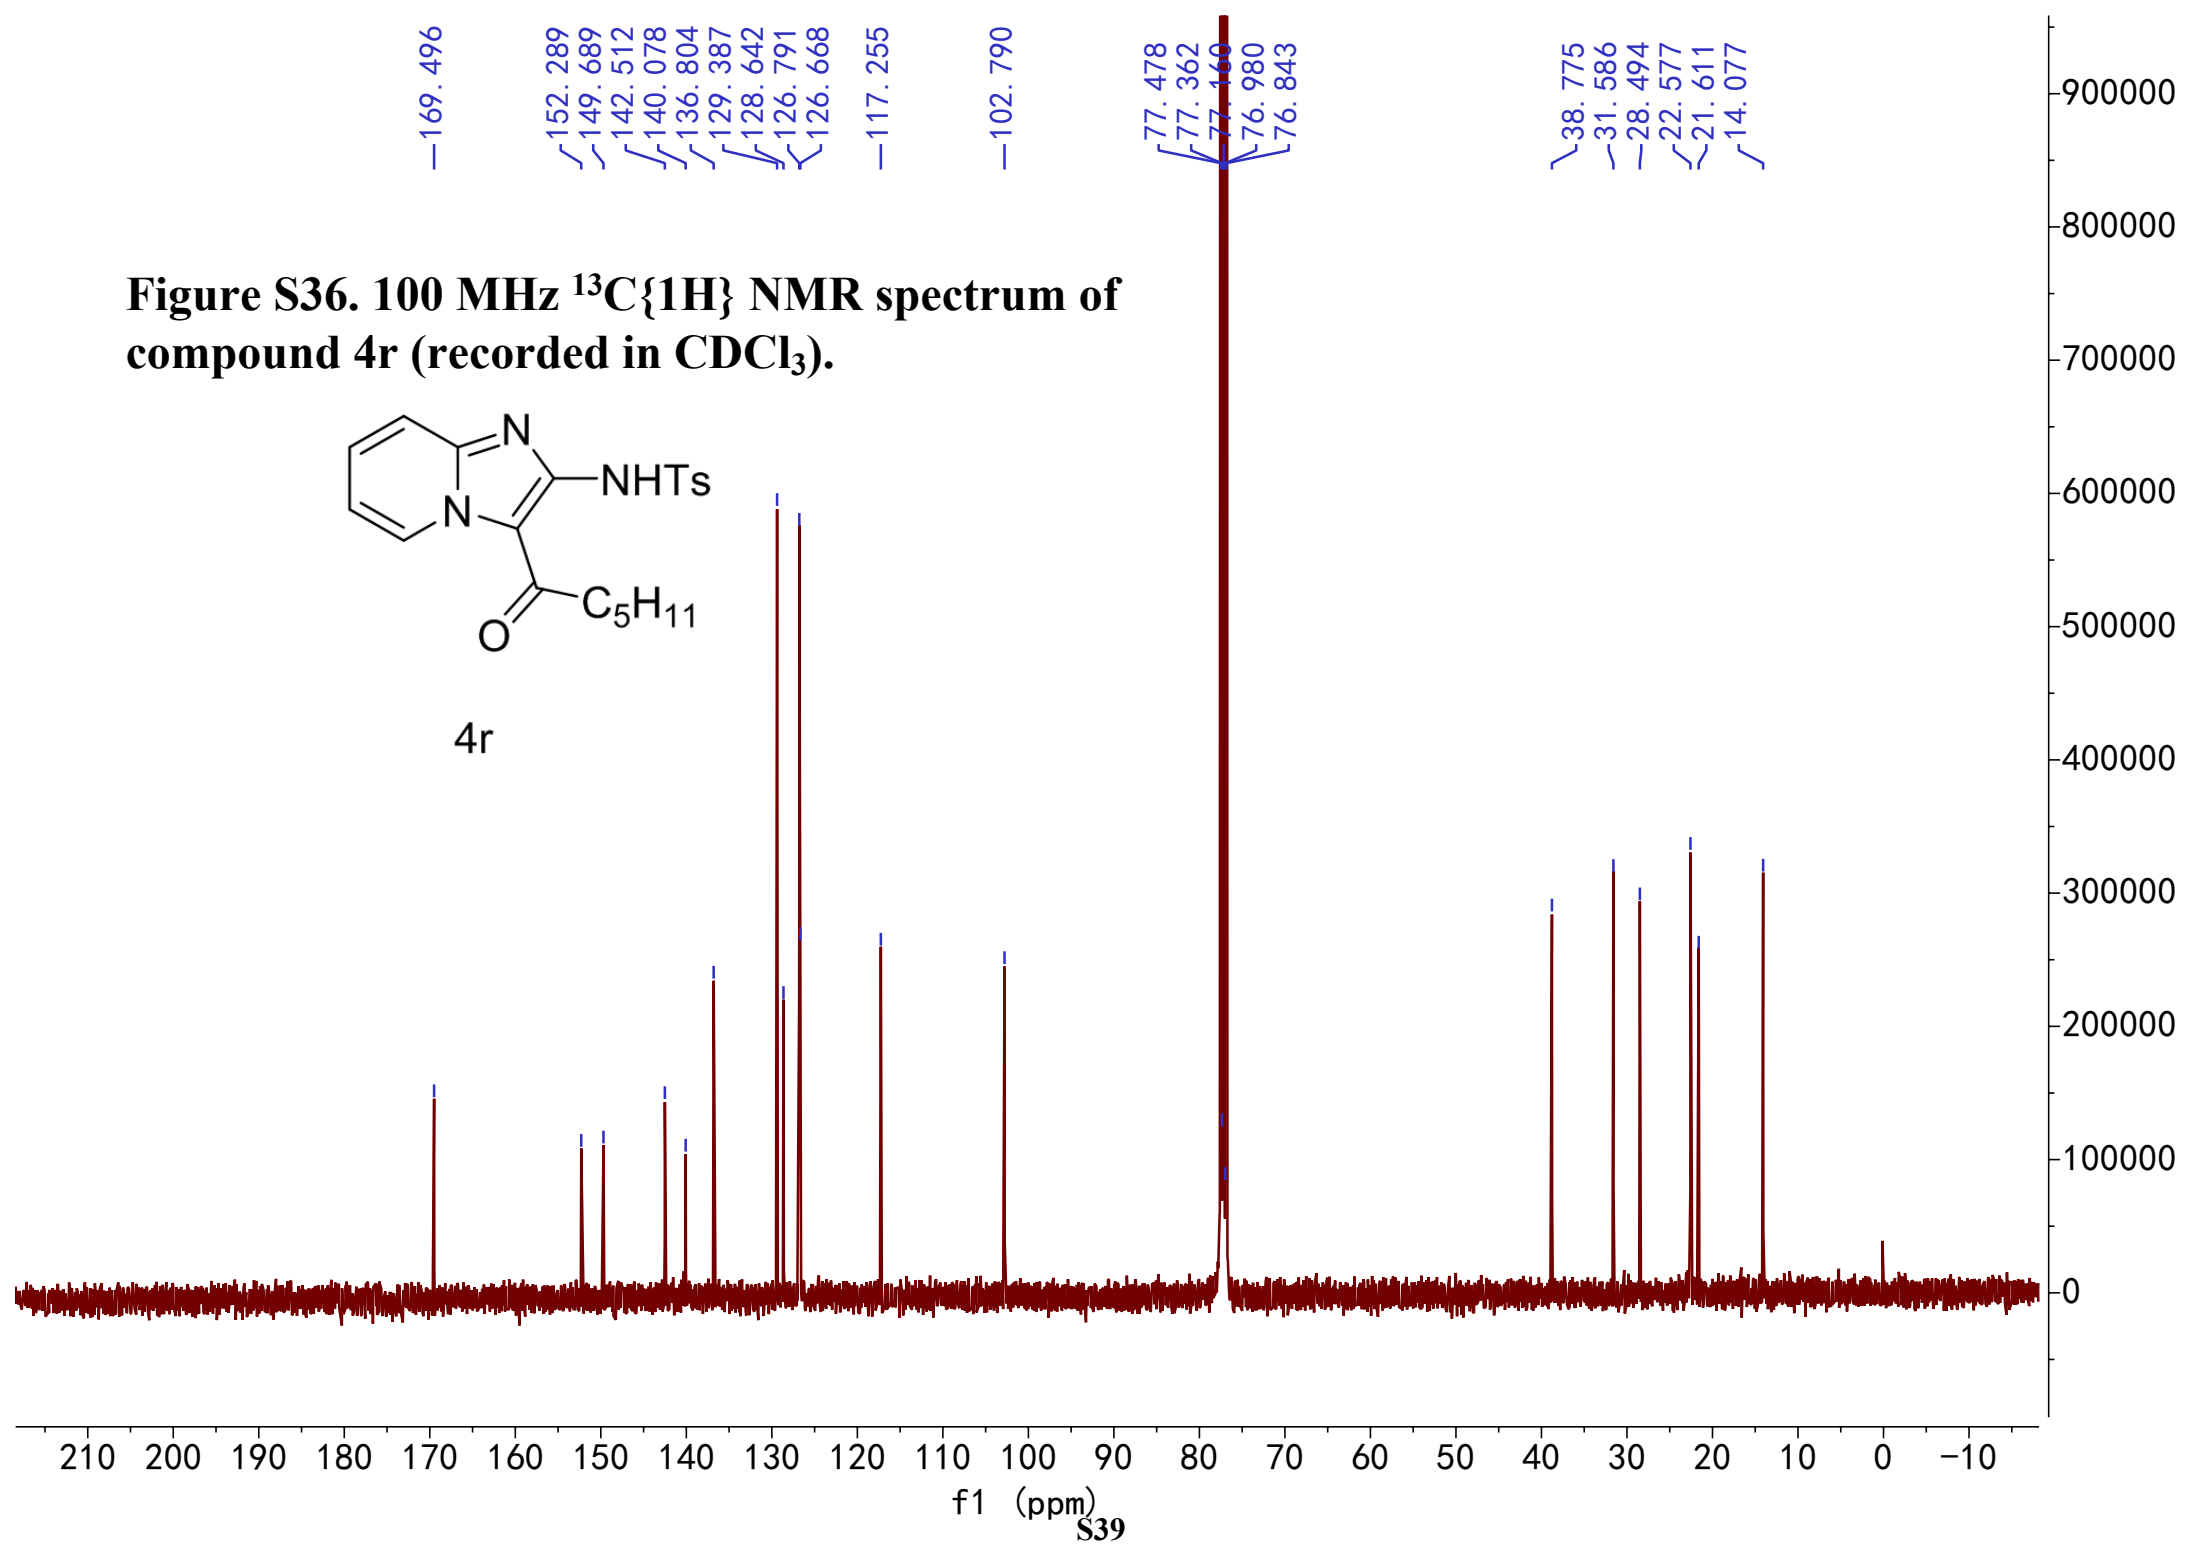

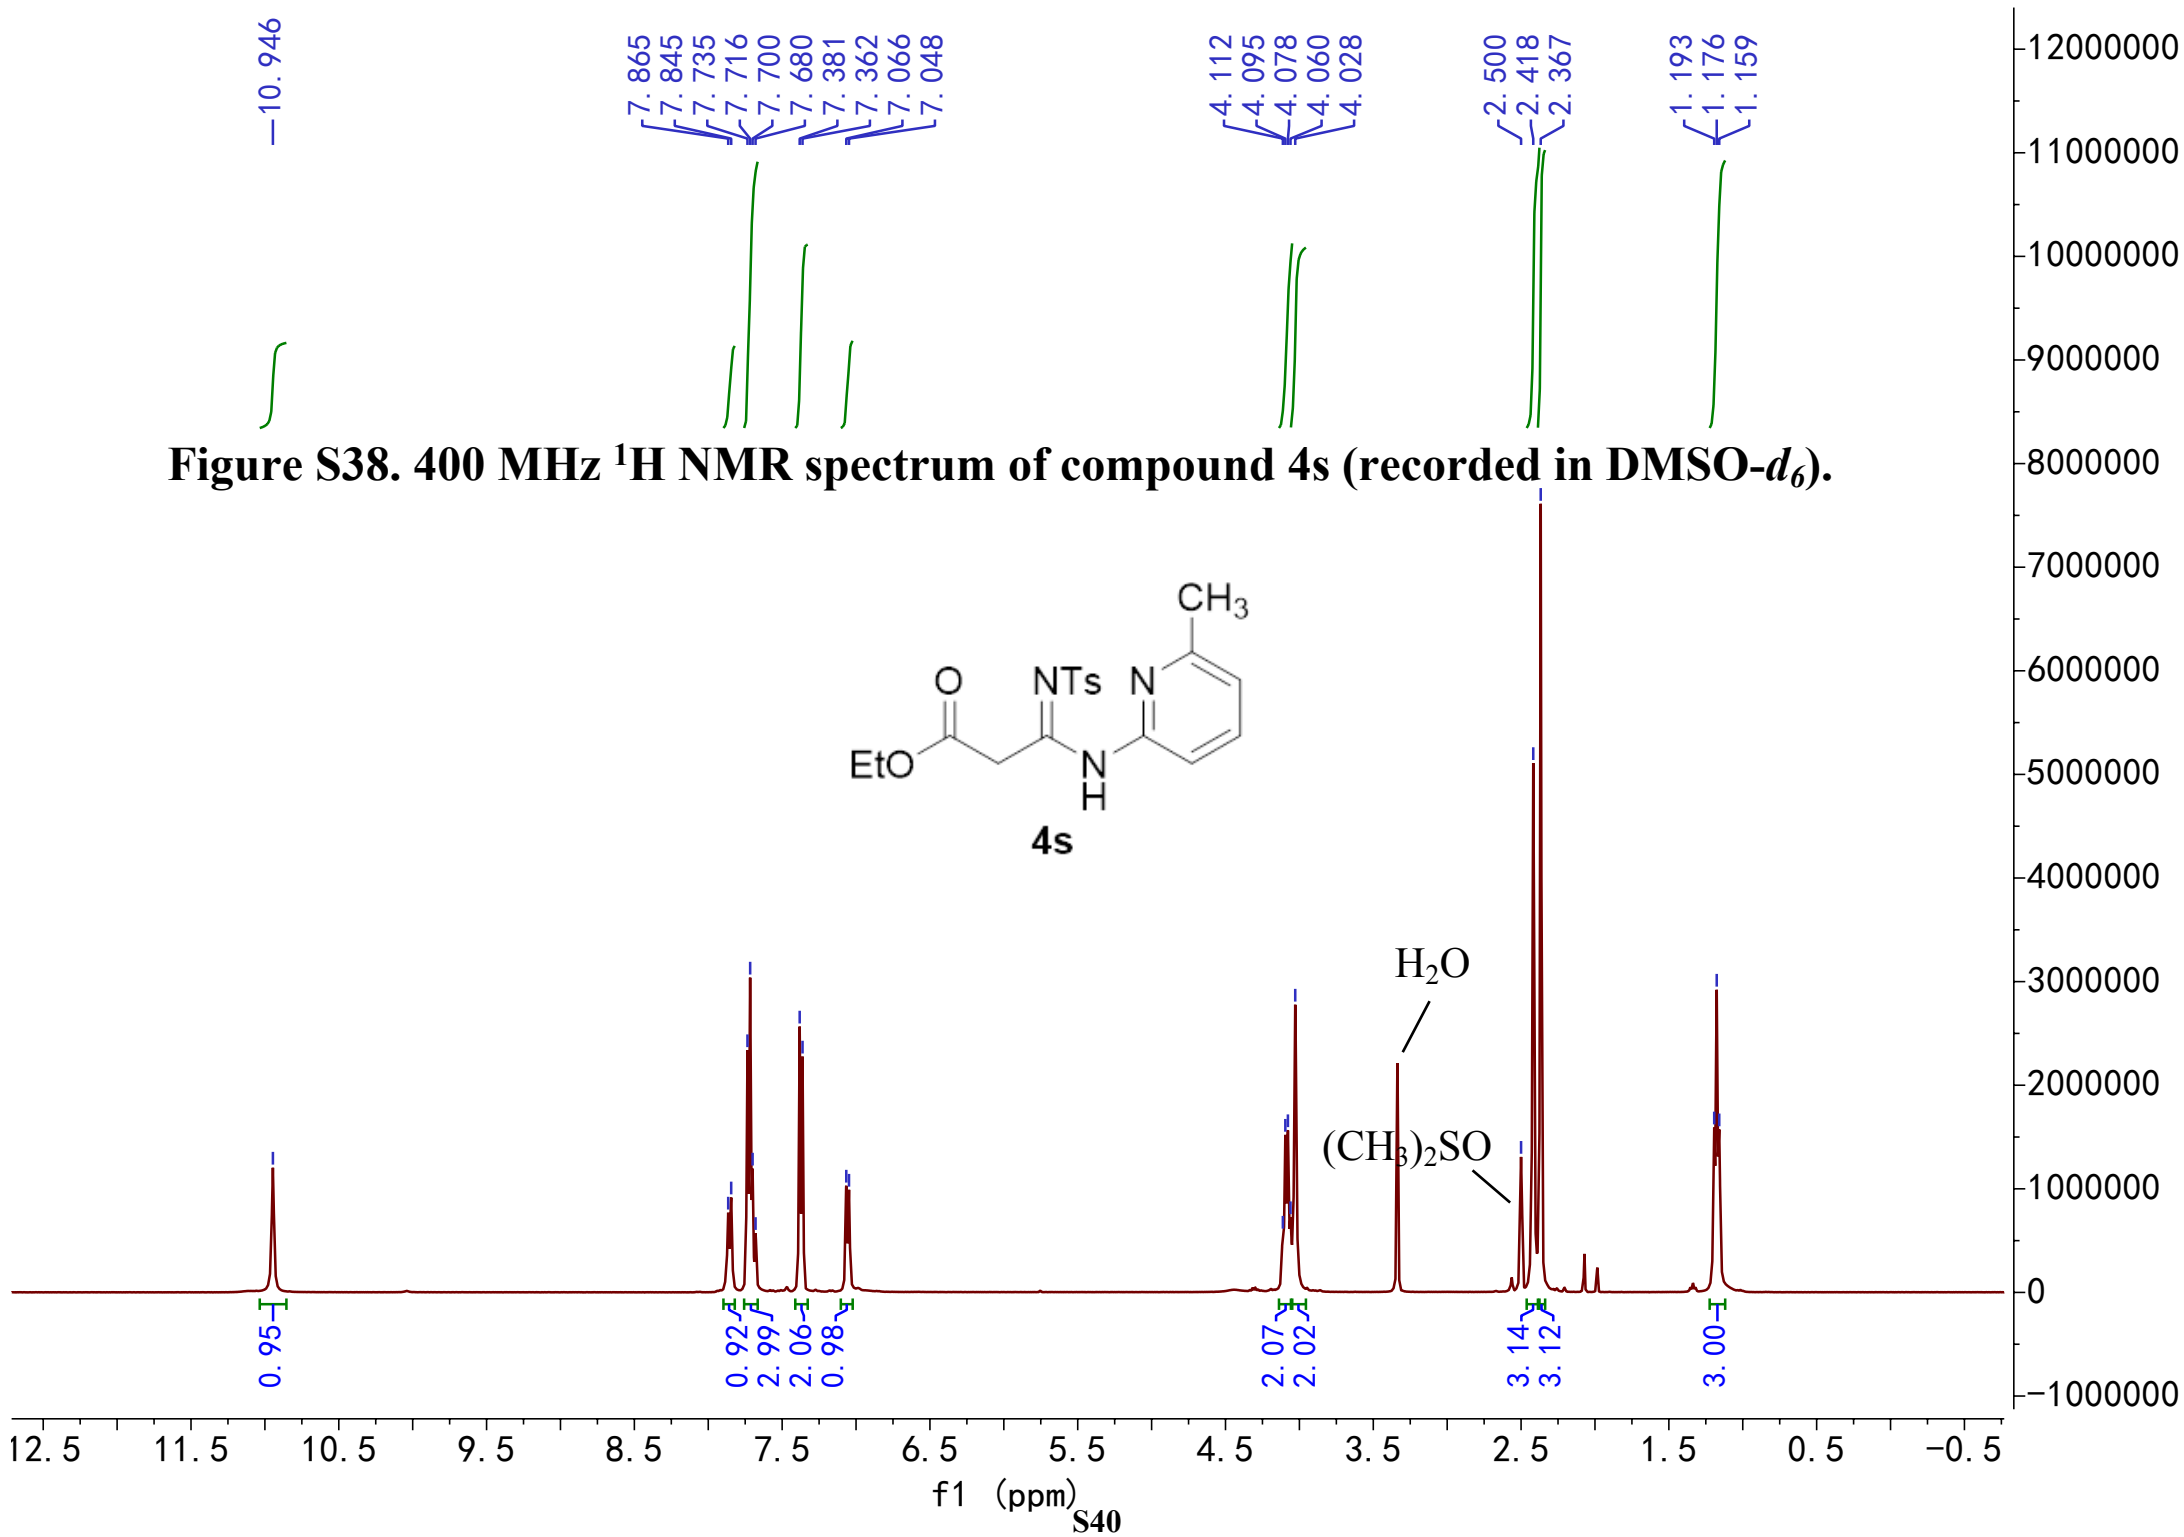



— 166.864  
~ 158.399  
~ 156.913  
~ 150.013  
~ 142.472  
~ 139.905  
~ 138.697  
~ 129.459  
~ 125.989  
~ 120.239  
— 112.348

— 60.917  
~ 40.147  
~ 39.938  
~ 39.729  
~ 39.520  
~ 39.311  
~ 39.104  
~ 38.894  
~ 23.412  
~ 20.936  
~ 13.943

**Figure S37. 100 MHz  $^{13}\text{C}\{^1\text{H}\}$  NMR spectrum of compound 4s (recorded in DMSO- $d_6$ ).**

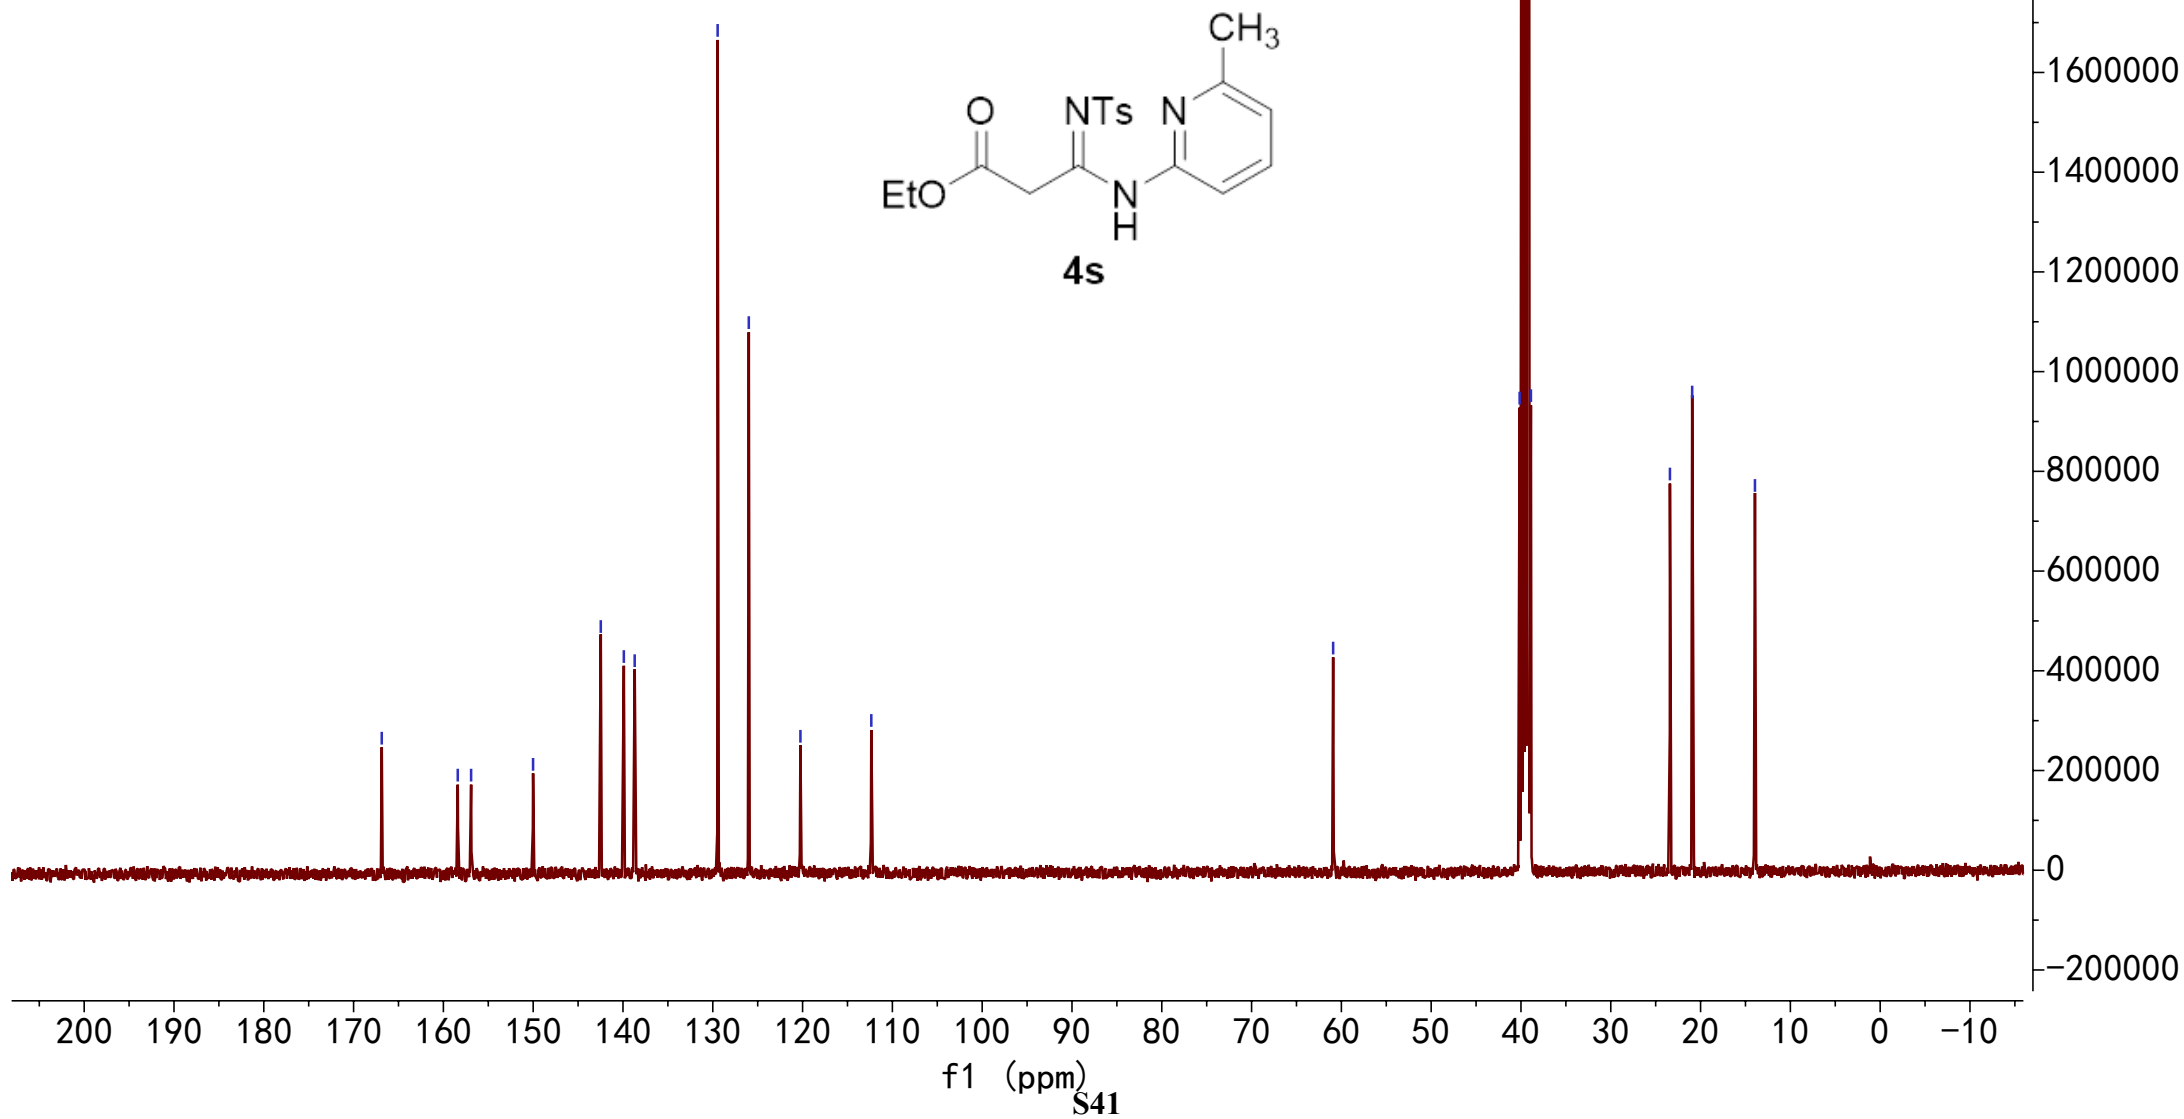

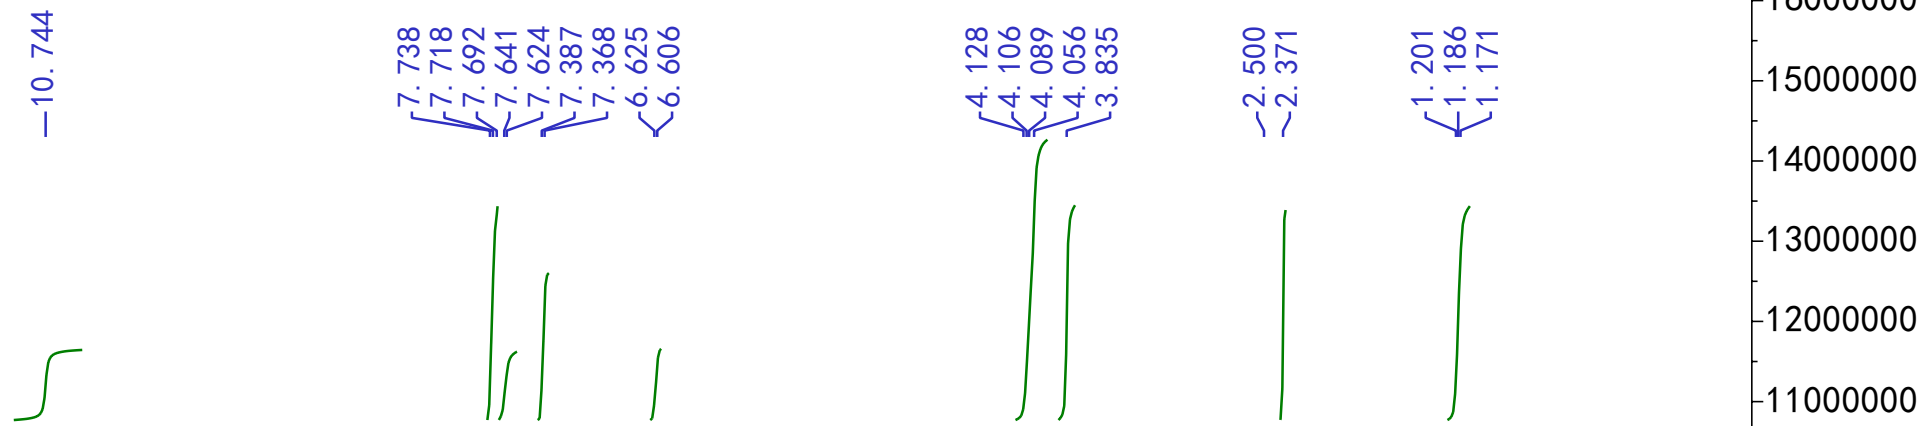

**Figure S39. 400 MHz  $^1\text{H}$  NMR spectrum of compound 4t (recorded in  $\text{DMSO-}d_6$ ).**

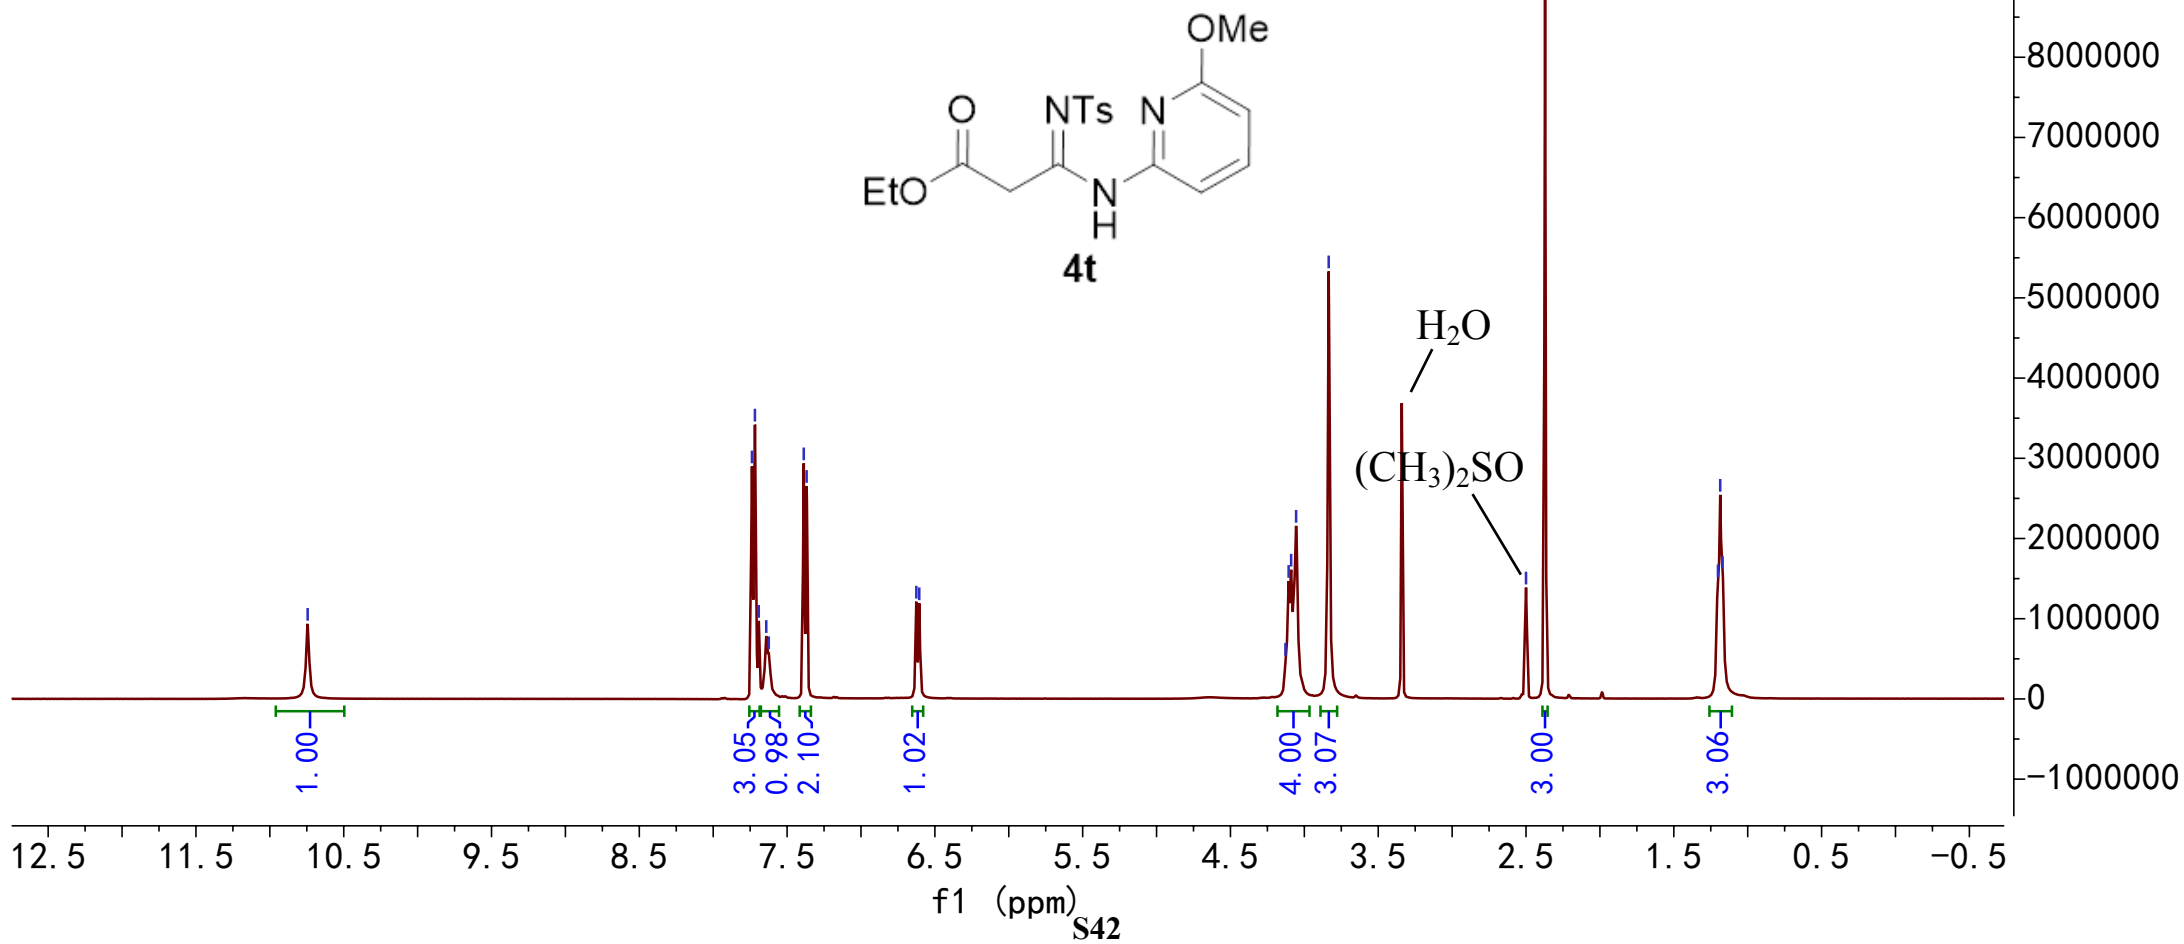

166.909  
 162.368  
 158.365  
 148.449  
 142.518  
 141.101  
 139.848  
 129.466  
 126.011  
 107.594  
 106.964  
 60.951  
 53.292  
 40.147  
 39.938  
 39.729  
 39.520  
 39.312  
 39.104  
 38.894  
 20.939  
 13.947

**Figure S40. 100 MHz  $^{13}\text{C}\{^1\text{H}\}$  NMR spectrum of compound 4t (recorded in  $\text{DMSO-}d_6$ ).**

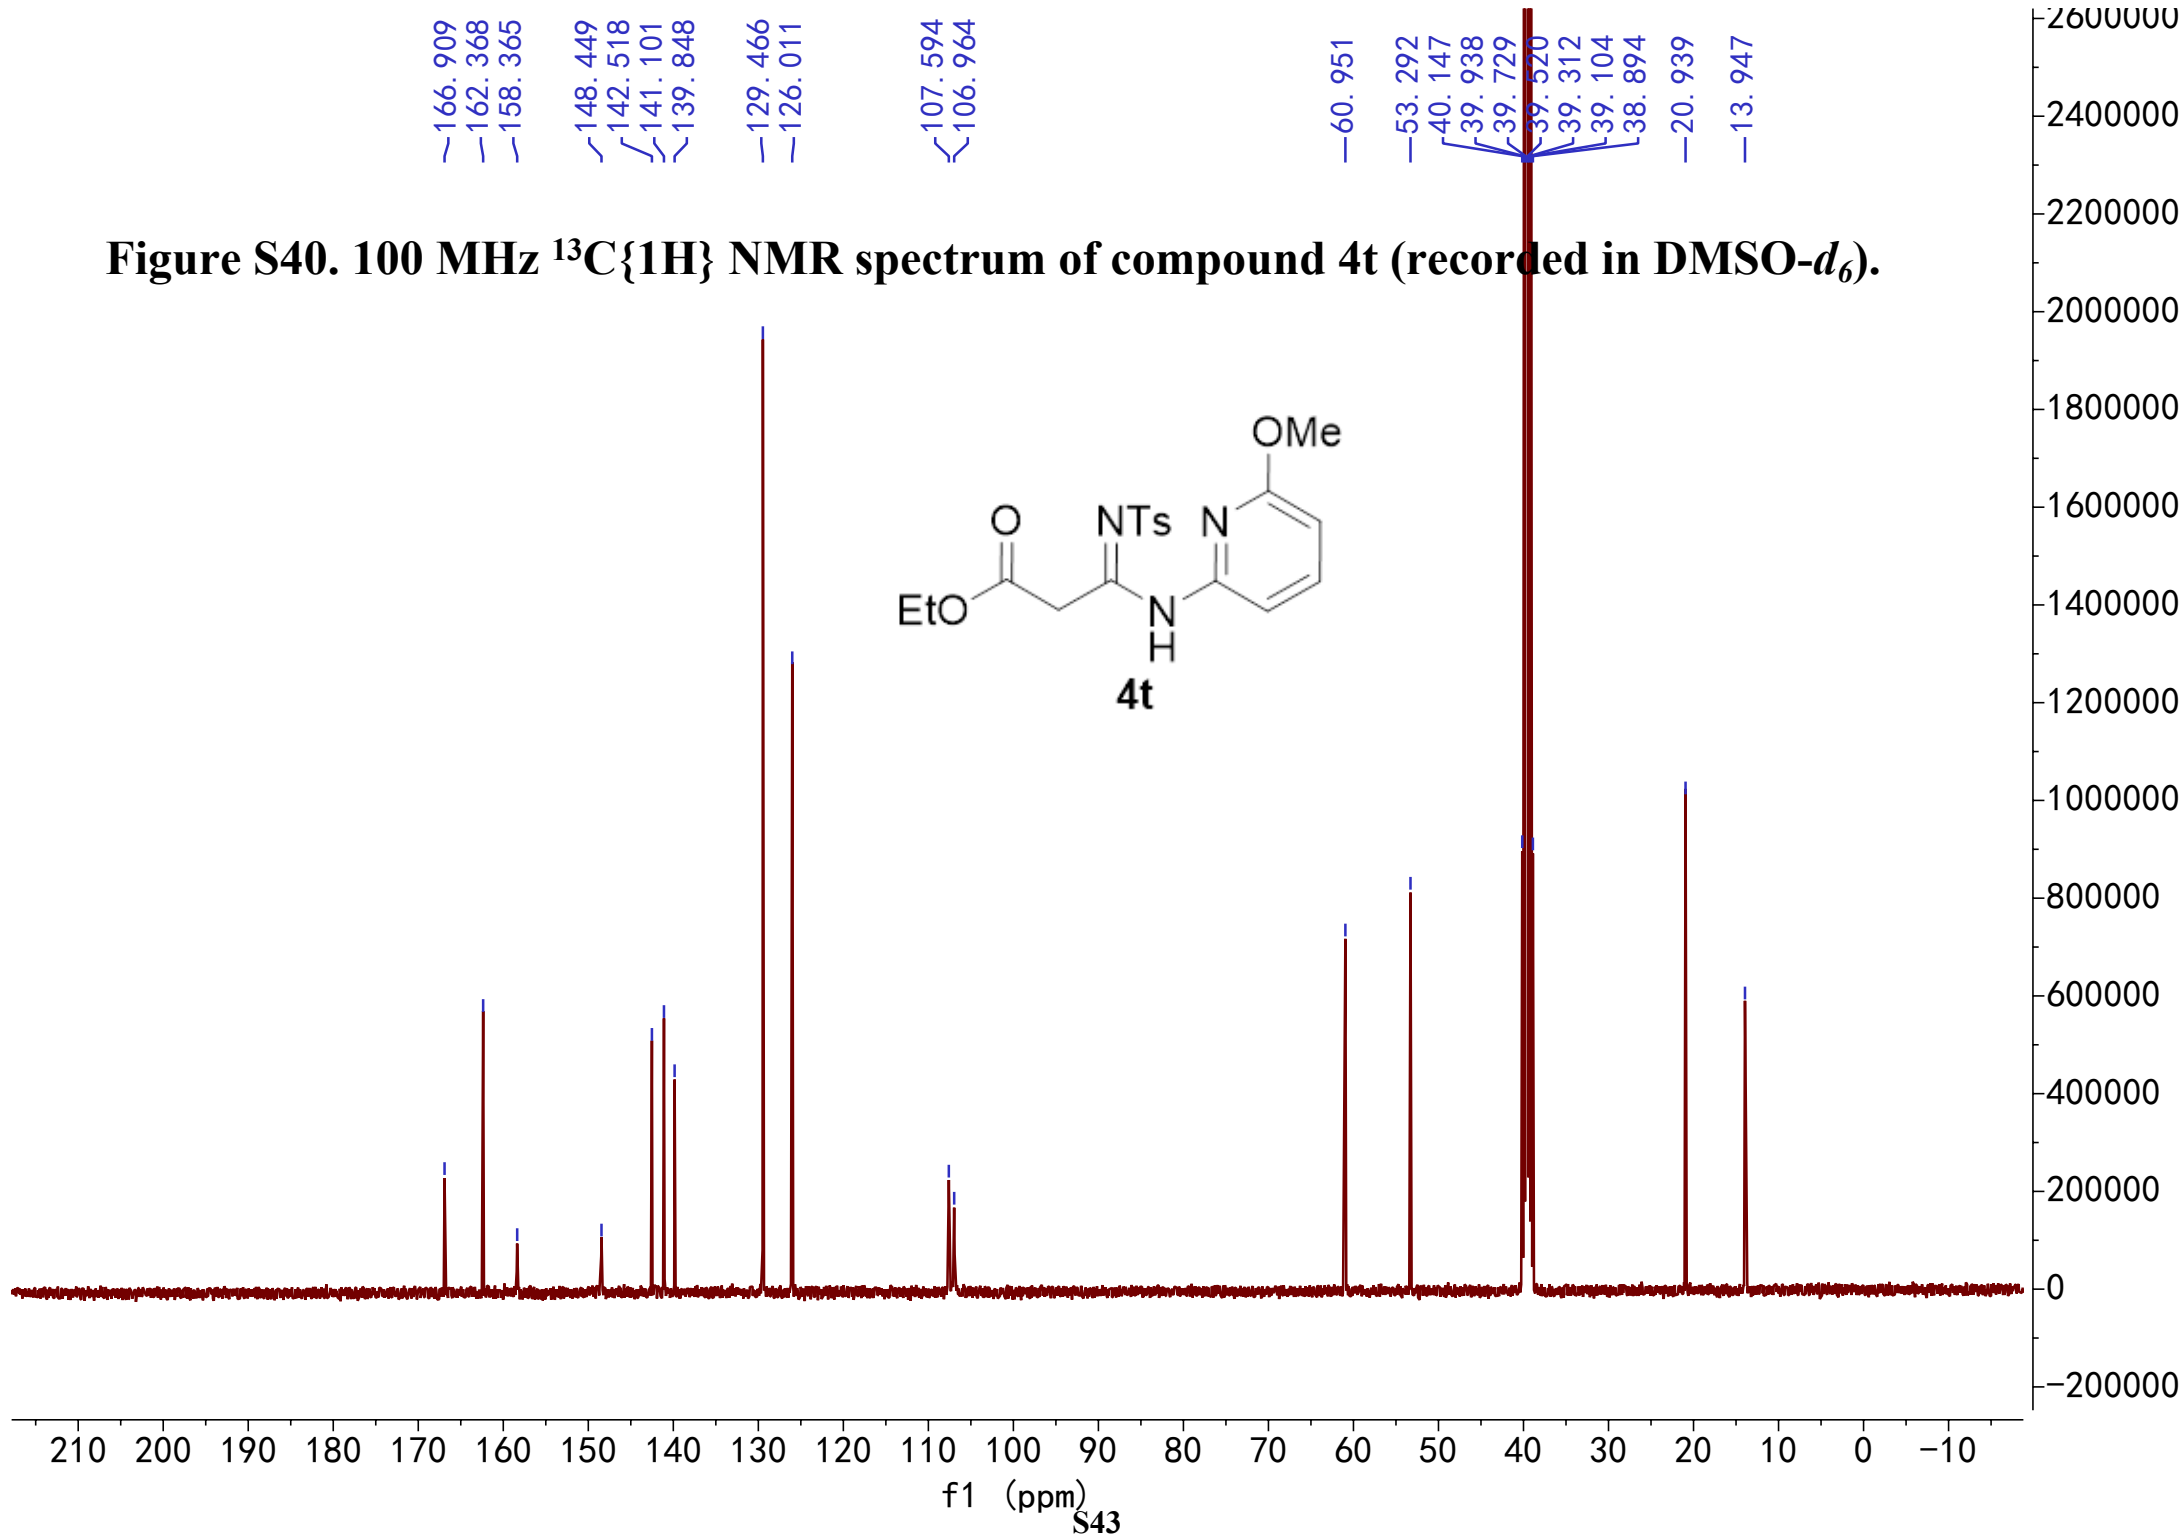

8.744  
8.094  
8.078  
8.053  
8.034  
7.677  
7.659  
7.381  
7.359  
7.277  
7.259  
7.223  
7.205  
7.041  
7.026  
7.009  
6.989  
6.971

**Figure S41. 400 MHz <sup>1</sup>H NMR spectrum of compound 4u (recorded in DMSO-d<sub>6</sub>).**

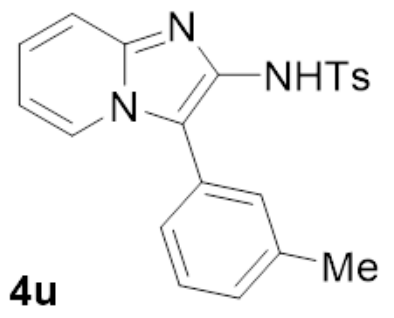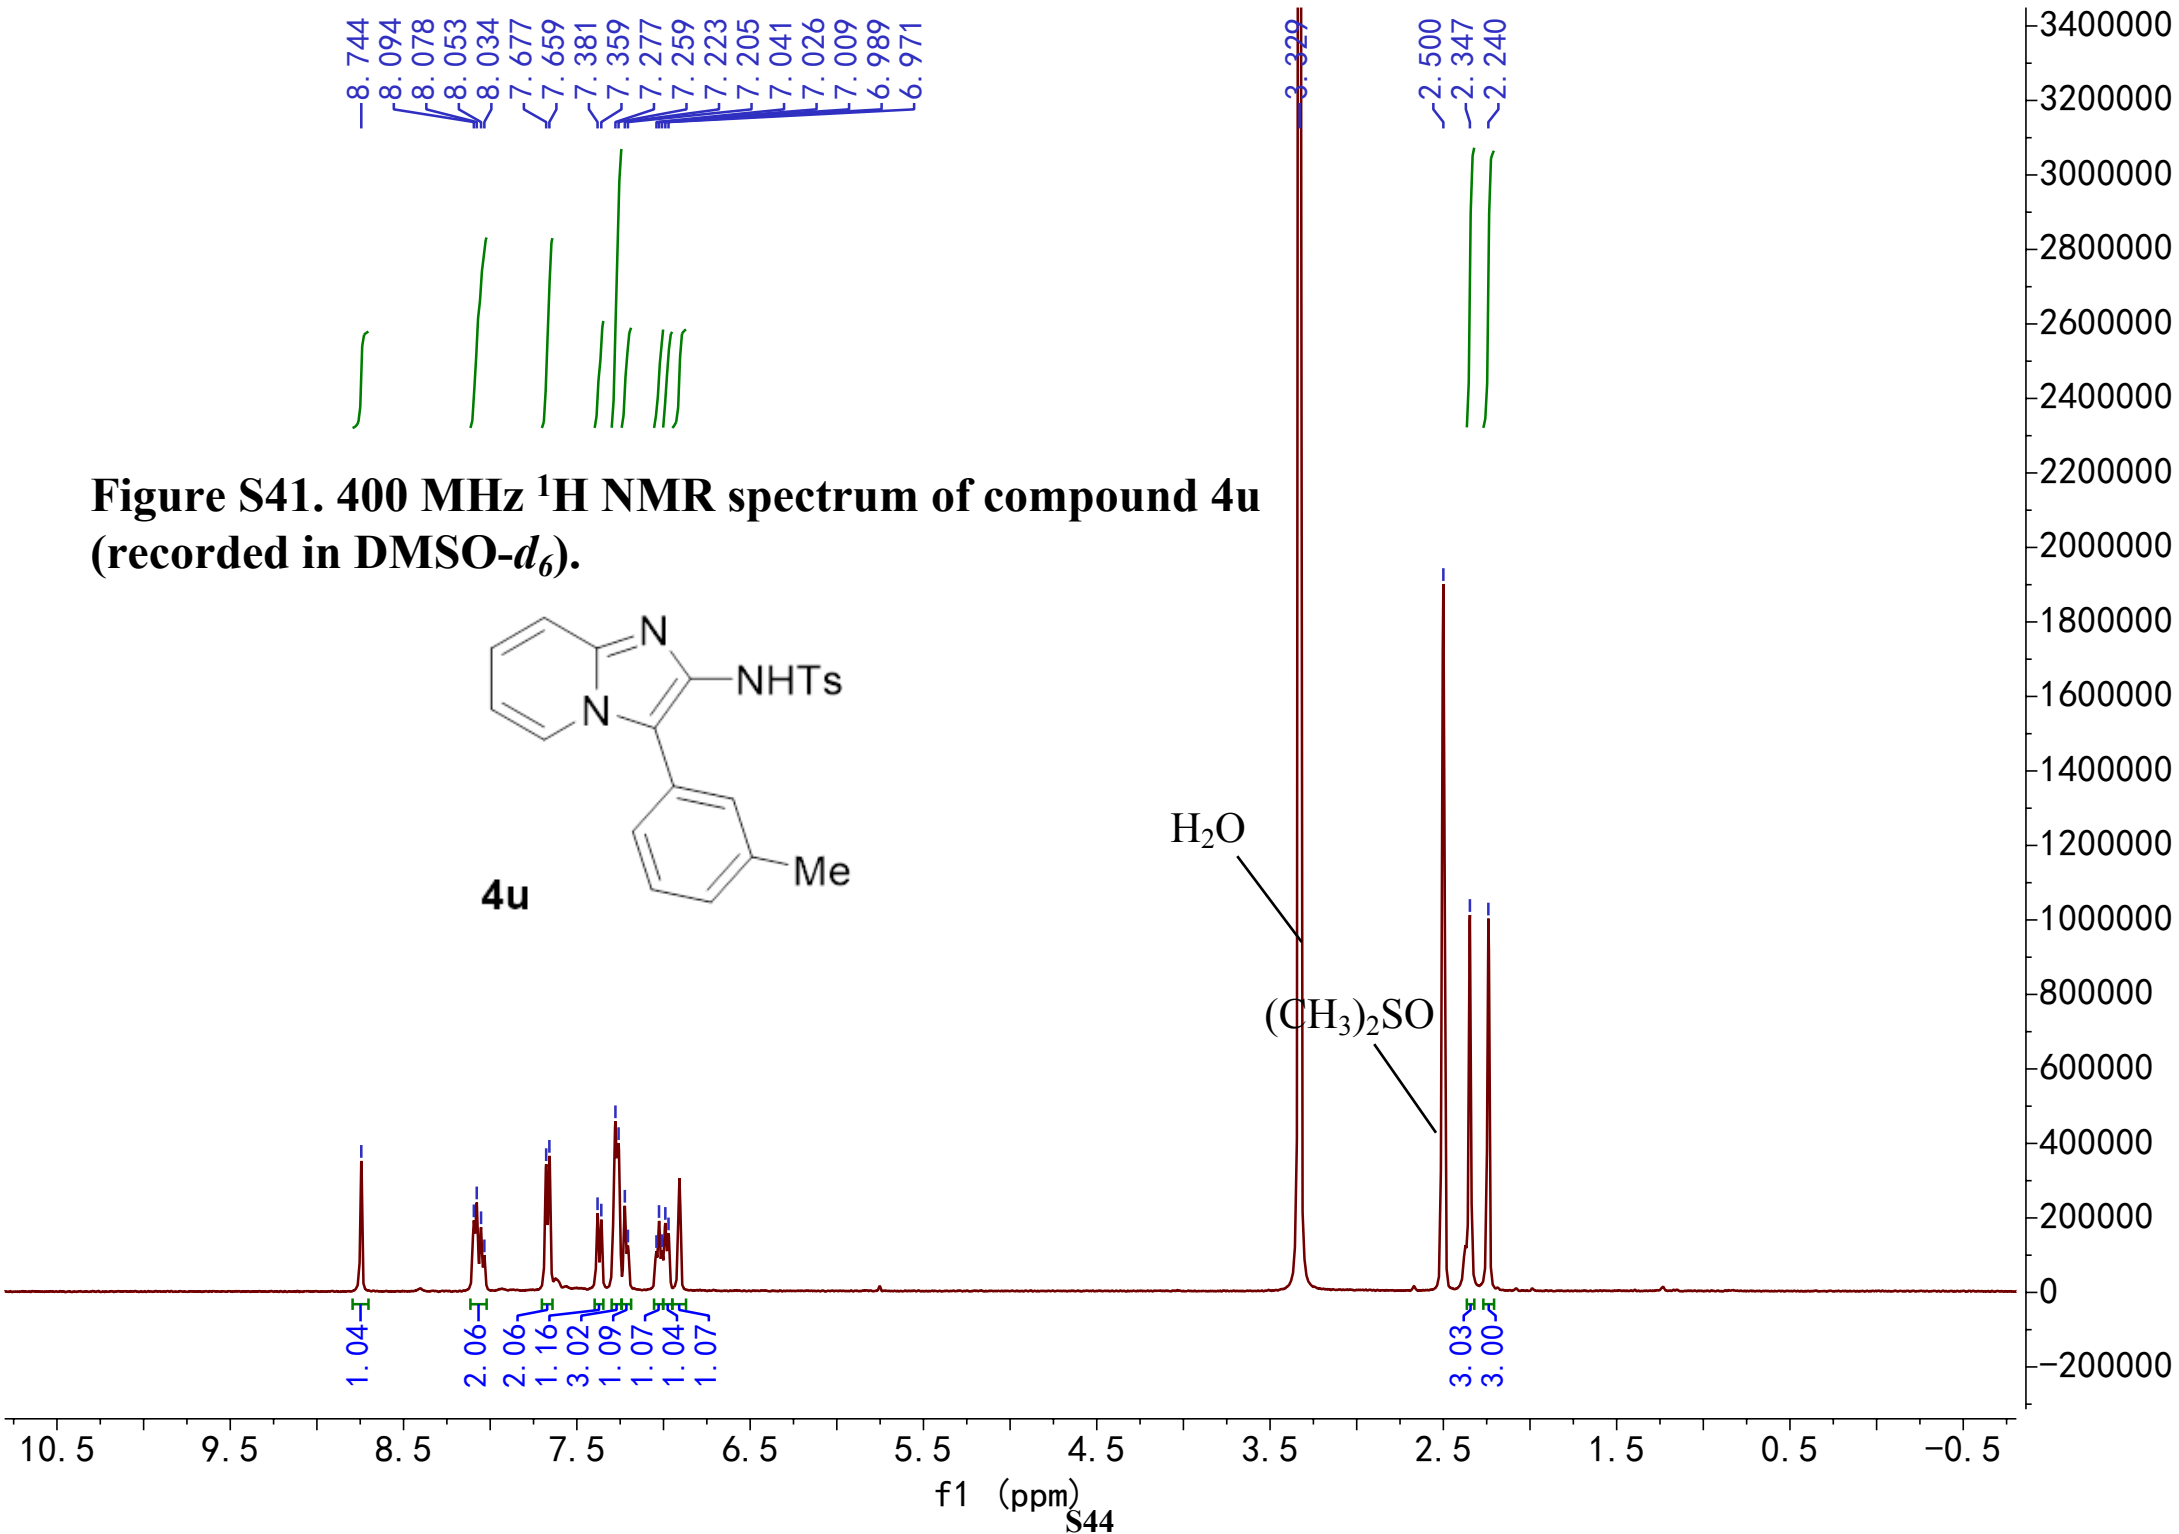

—178.039  
 —162.517  
 146.506  
 141.471  
 140.152  
 138.001  
 137.524  
 135.477  
 130.145  
 128.626  
 128.602  
 126.948  
 125.398  
 122.101  
 116.128  
 115.729  
 —95.901  
 40.146  
 39.938  
 39.730  
 39.520  
 39.312  
 39.103  
 38.894  
 21.002  
 20.947

**Figure S42. 100 MHz  $^{13}\text{C}\{^1\text{H}\}$  NMR spectrum of compound 4u (recorded in DMSO- $d_6$ ).**

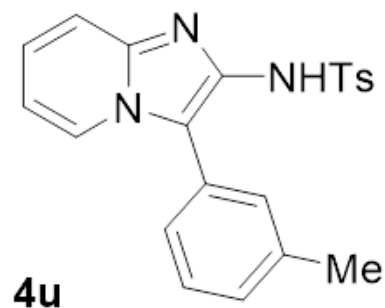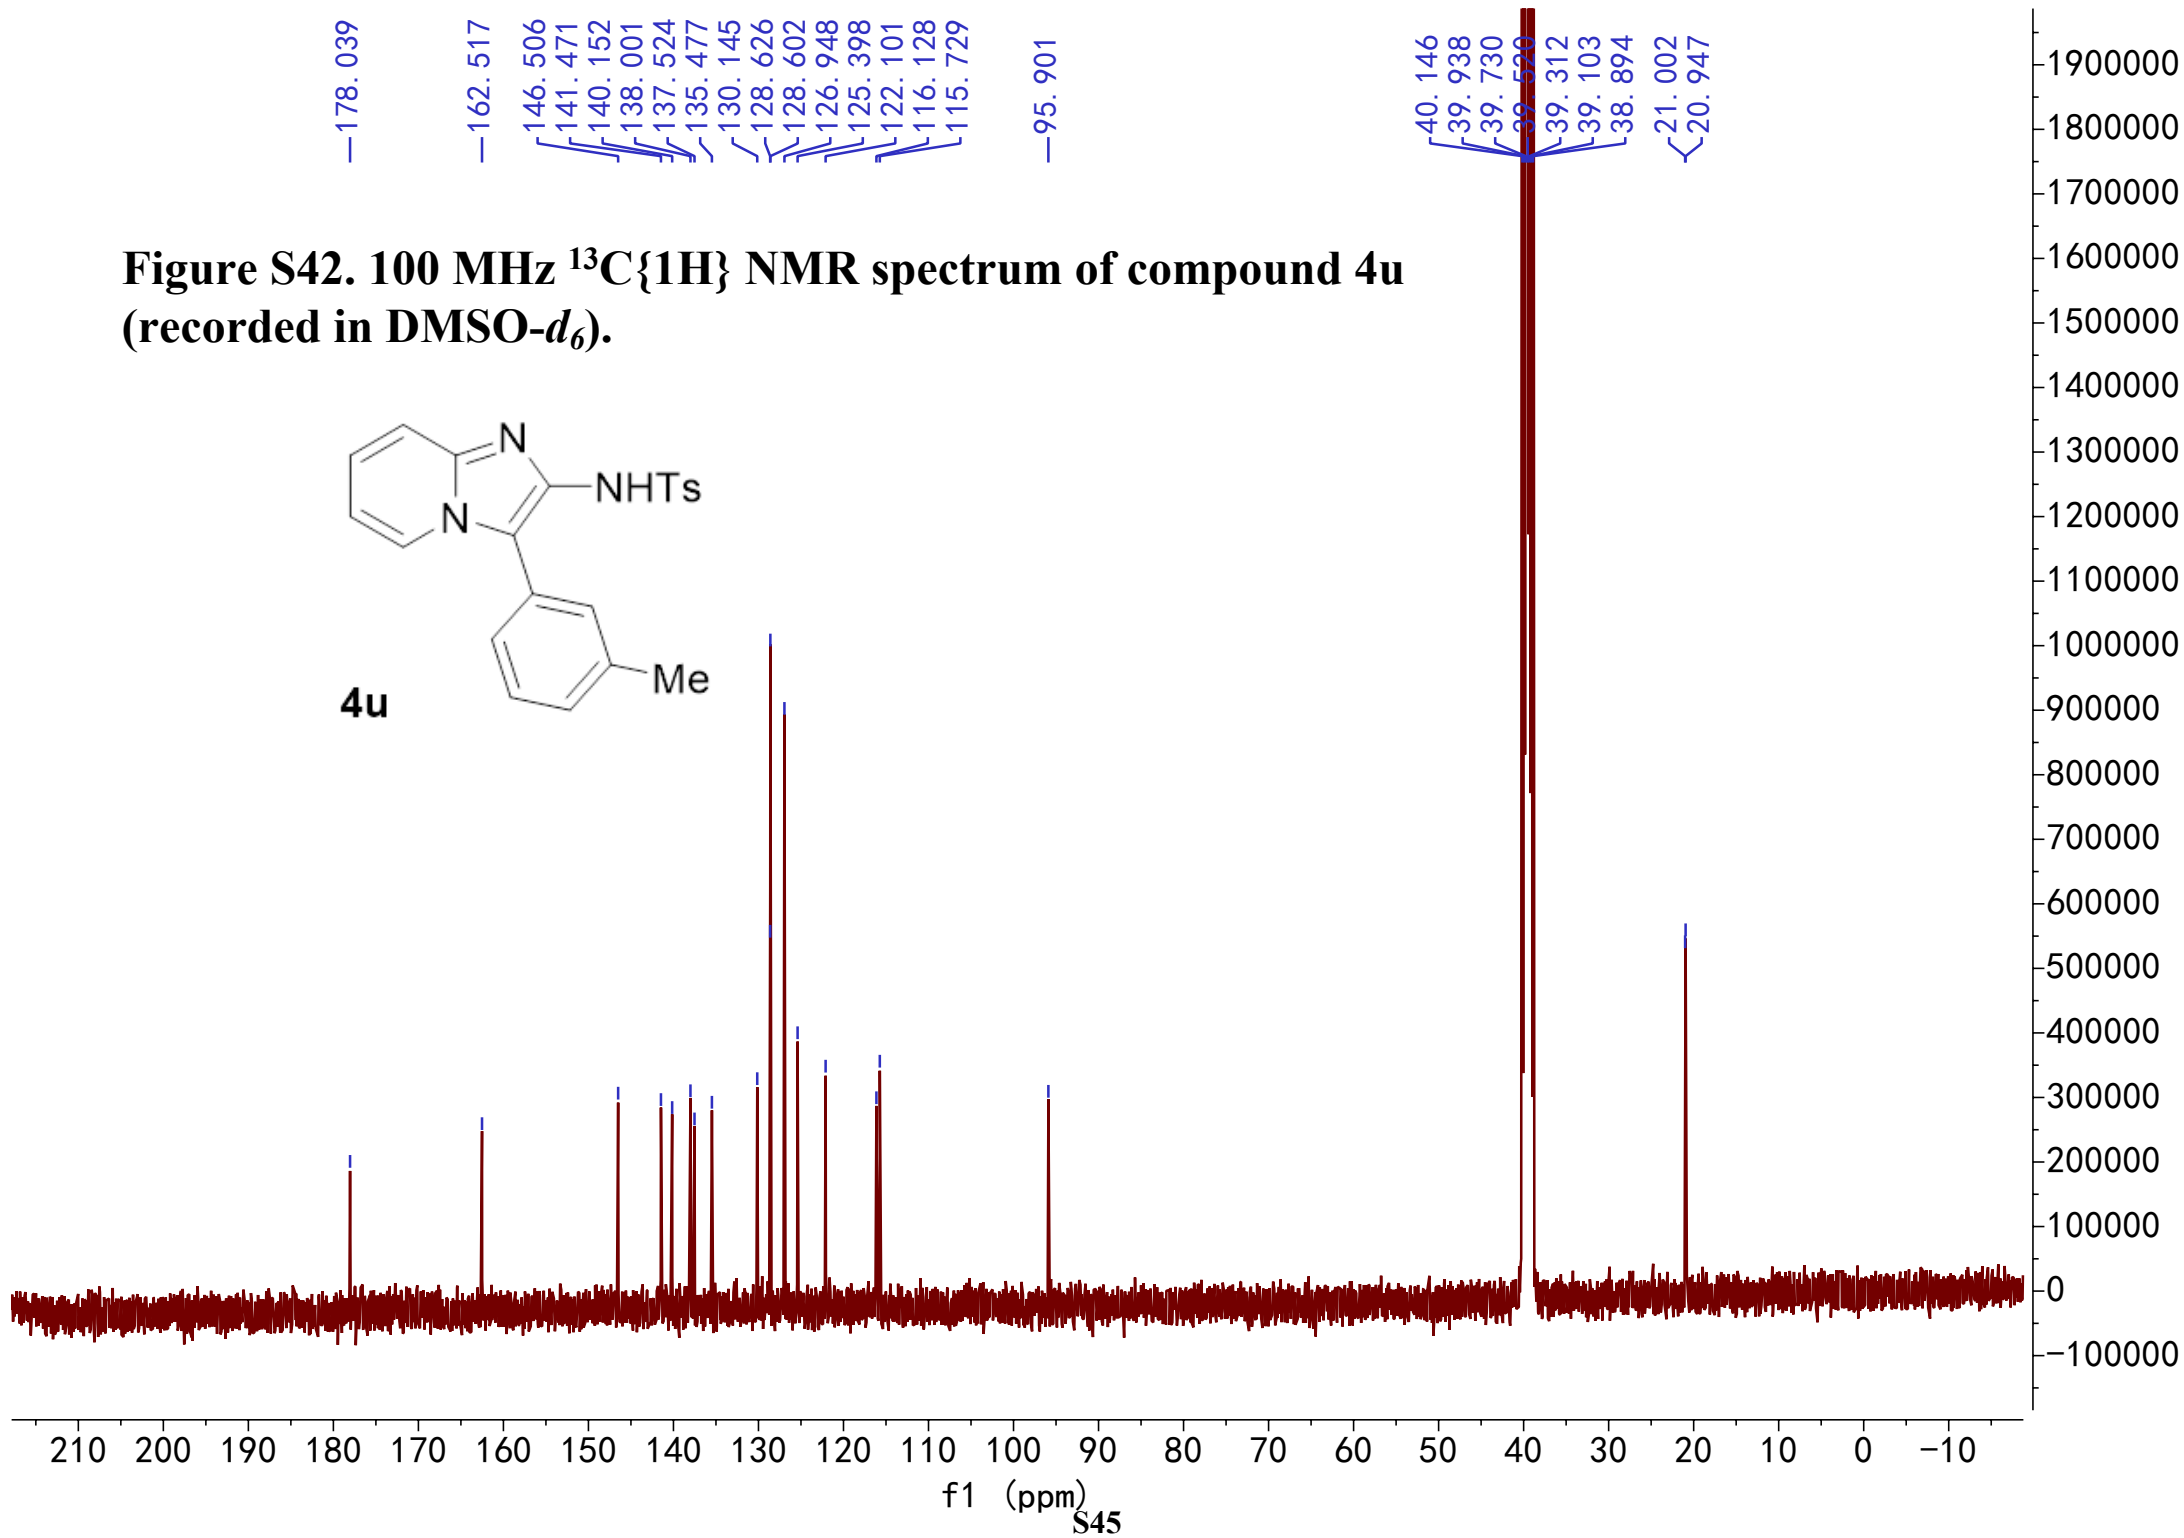

8.151  
7.909  
7.890  
7.614  
7.595  
7.576  
7.320  
7.301  
7.260  
7.158  
7.085  
6.998

-4.423

-2.431  
-2.329

**Figure S43. 400 MHz  $^1\text{H}$  NMR spectrum of compound 4v (recorded in  $\text{CDCl}_3$ ).**

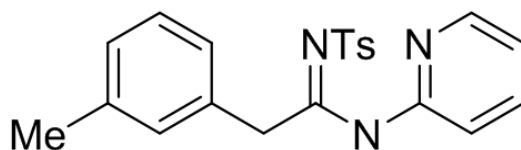

4v

10.5 9.5 8.5 7.5 6.5 5.5 4.5 3.5 2.5 1.5 0.5 -0.5

f1 (ppm)

S46

1.99

2.00

2.03

3.00

4.00

2.04

3.02

2.96

1000000  
900000  
800000  
700000  
600000  
500000  
400000  
300000  
200000  
100000  
0

Figure S44. 100 MHz  $^{13}\text{C}\{^1\text{H}\}$  NMR spectrum of compound 4v (recorded in  $\text{CDCl}_3$ ).

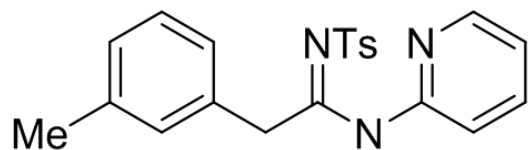

4v

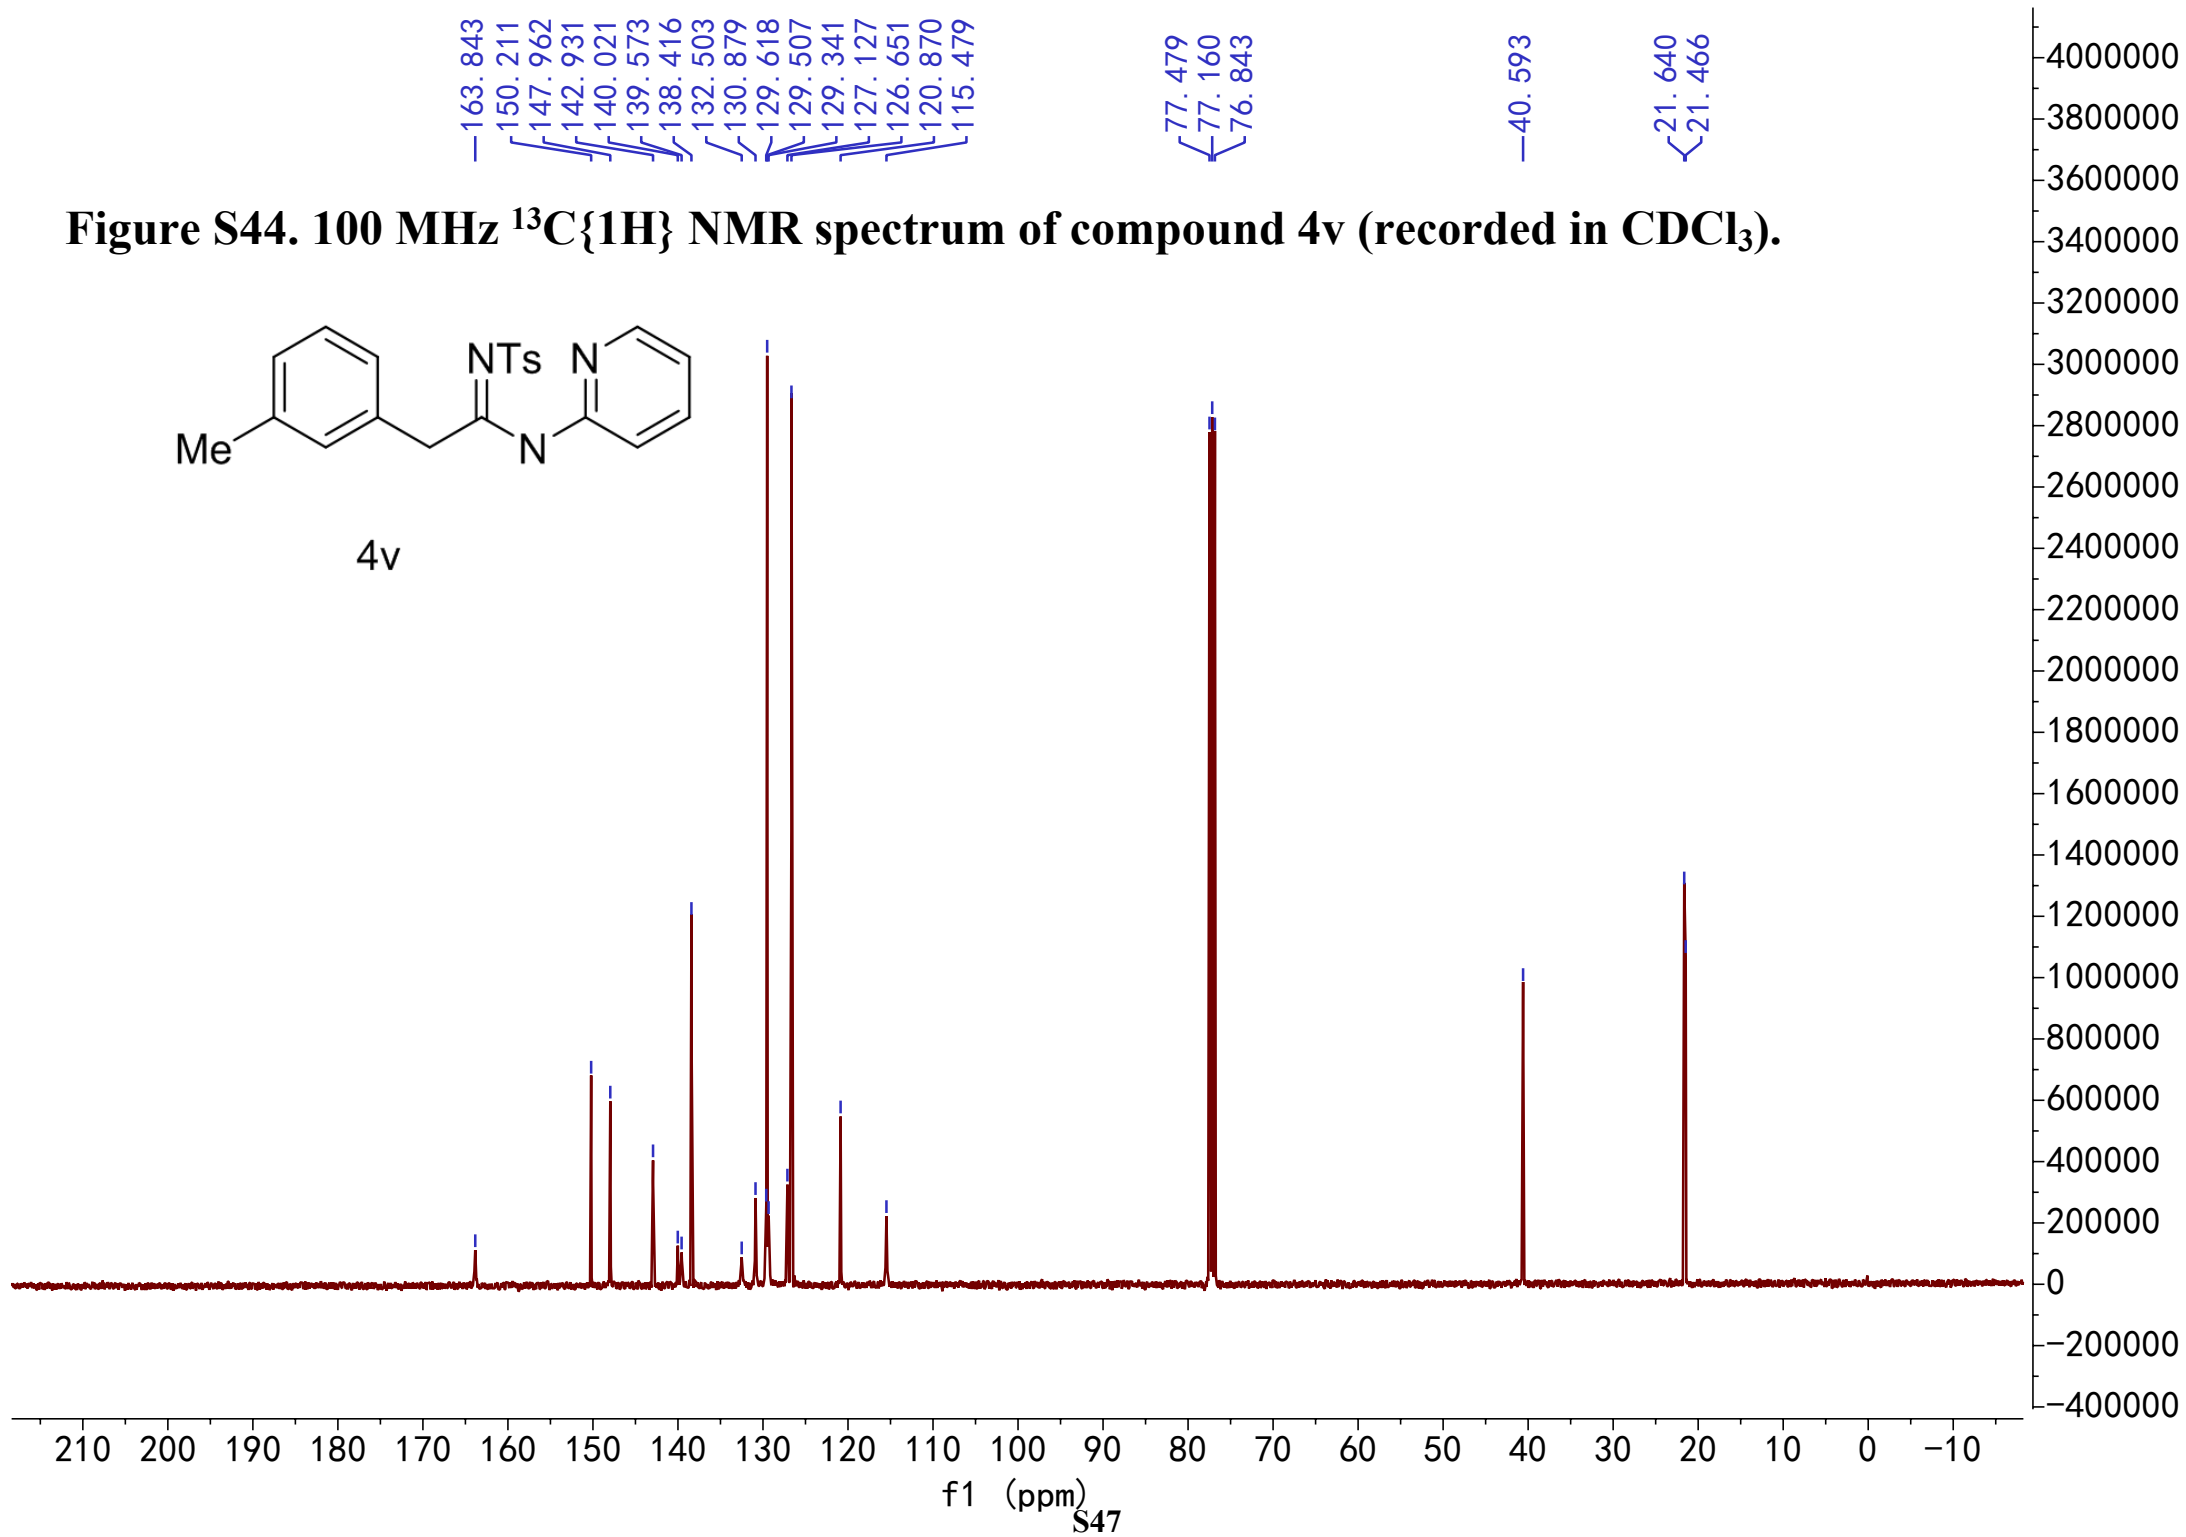

8.178  
8.113  
7.916  
7.897  
7.622  
7.602  
7.582  
7.508  
7.332  
7.313  
7.260  
7.242  
7.225  
7.024  
7.010  
6.995  
6.947  
6.930

-4.422

-3.819

-2.443

**Figure S45. 400 MHz  $^1\text{H}$  NMR spectrum of compound 4x (recorded in  $\text{CDCl}_3$ ).**

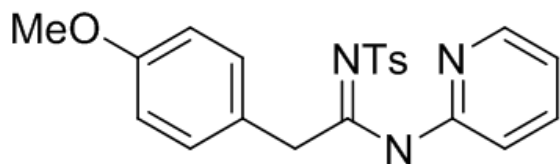

4x

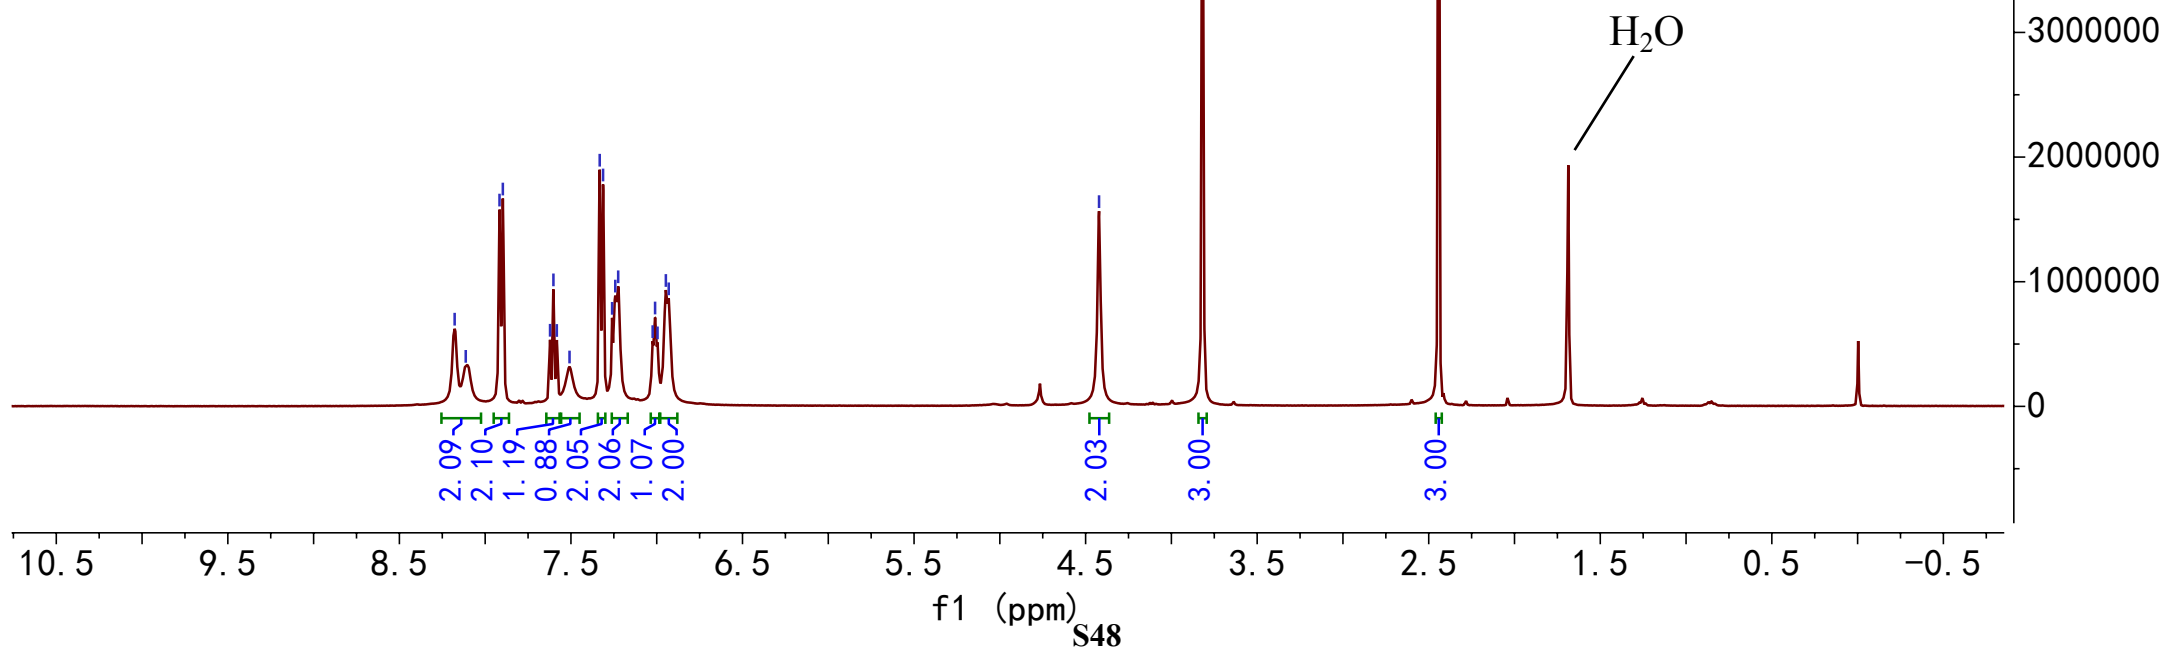



— 164.206  
— 159.765  
/ 150.210  
/ 148.032  
/ 142.952  
/ 140.082  
/ 138.461  
/ 131.502  
/ 129.538  
/ 126.664  
/ 124.235  
/ 120.911  
/ 115.397  
/ 115.264

{ 77.479  
{ 77.161  
{ 76.843  
— 55.428  
— 39.941  
— 21.681

**Figure S46. 100 MHz  $^{13}\text{C}\{^1\text{H}\}$  NMR spectrum of compound 4x (recorded in  $\text{CDCl}_3$ ).**

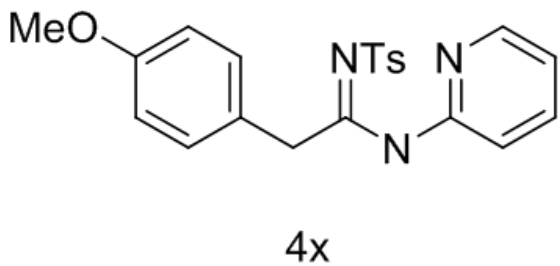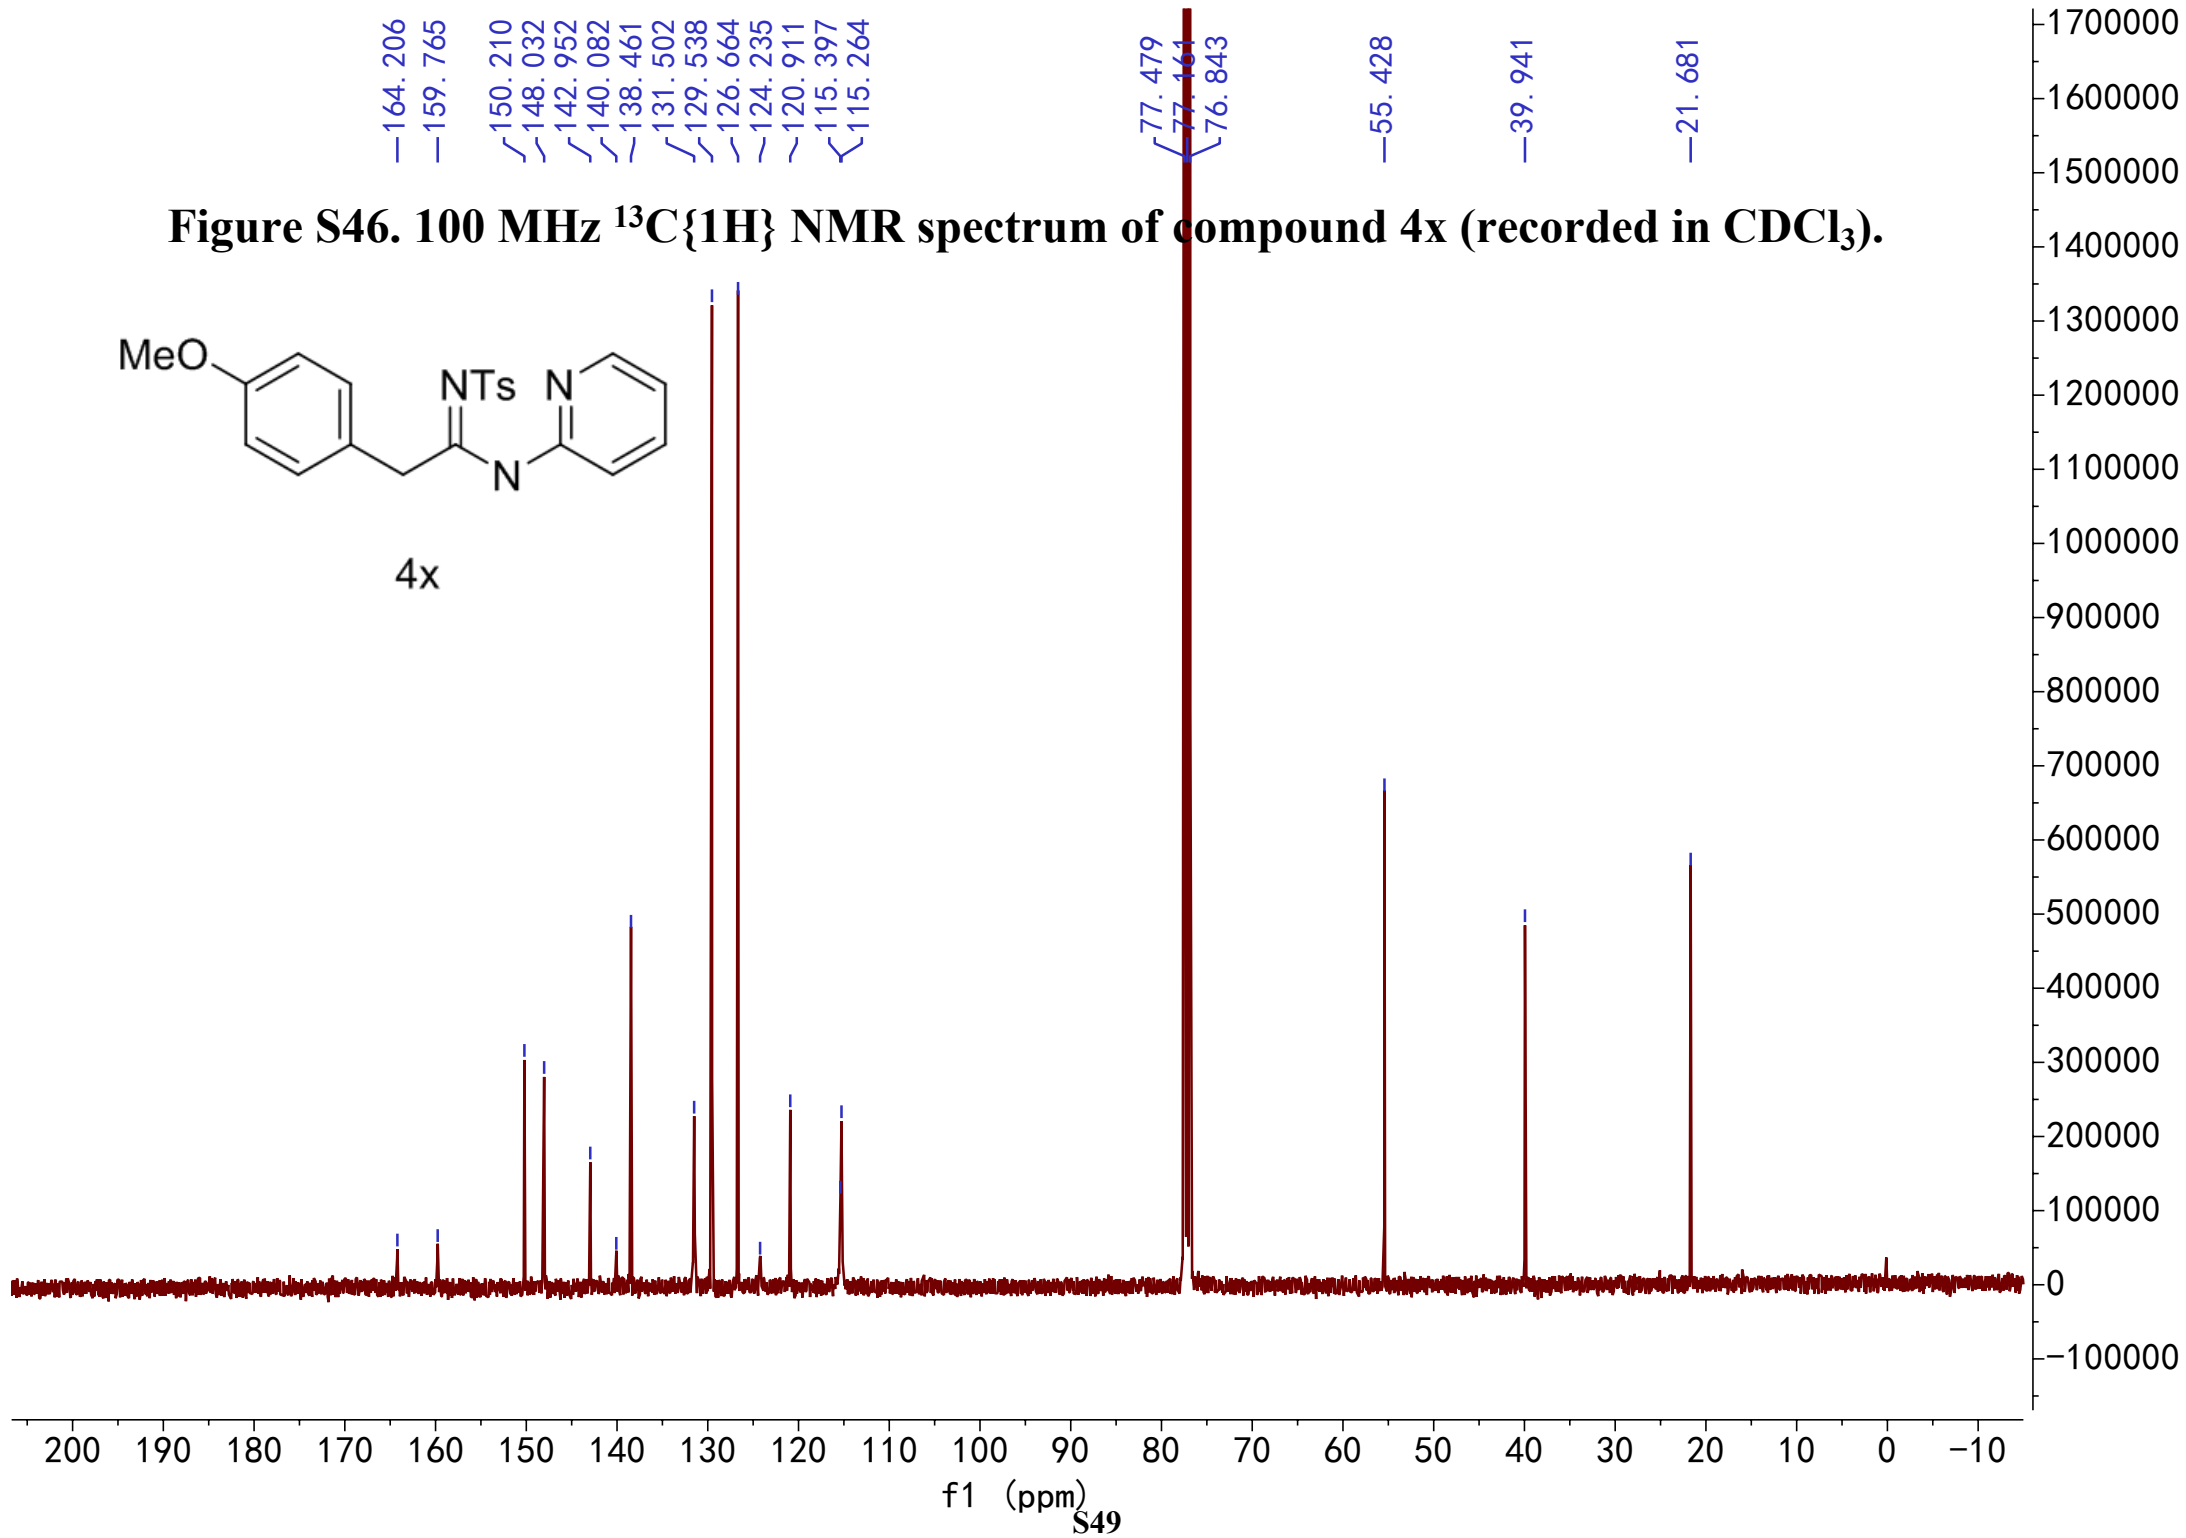

Supplement: d2ra02722d1.pdf [file d2ra02722d1.pdf]
